# Supplementary material for: Development and applications of remote stereocontrol using allylic organobismuth reagents
Source: Royal Society of Chemistry journal article supplement (doi:10.1039/c3ob41931b), 2013-01-01
Supplement: c3ob41931b.pdf [file c3ob41931b.pdf]

SD25F11-14  
STANDARD IN OBSERVE

Solvent: CDCl<sub>3</sub>  
Ambient temperature  
Sample #35  
File: 3501  
Queue name Nov19b  
DATE Nov 19 01  
INNOVA-300 "athos"

PULSE SEQUENCE  
Relax. delay 3.300 sec  
Pulse 90.0 degrees  
Acq. time 3.641 sec  
Width 4499.9 Hz  
16 repetitions

OBSERVE ML, 299.8458793 MHz  
DATA PROCESSING  
Line broadening 0.3 Hz  
PT size 65536  
Total time 1 minutes

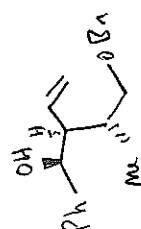

3 (major - LM peak)

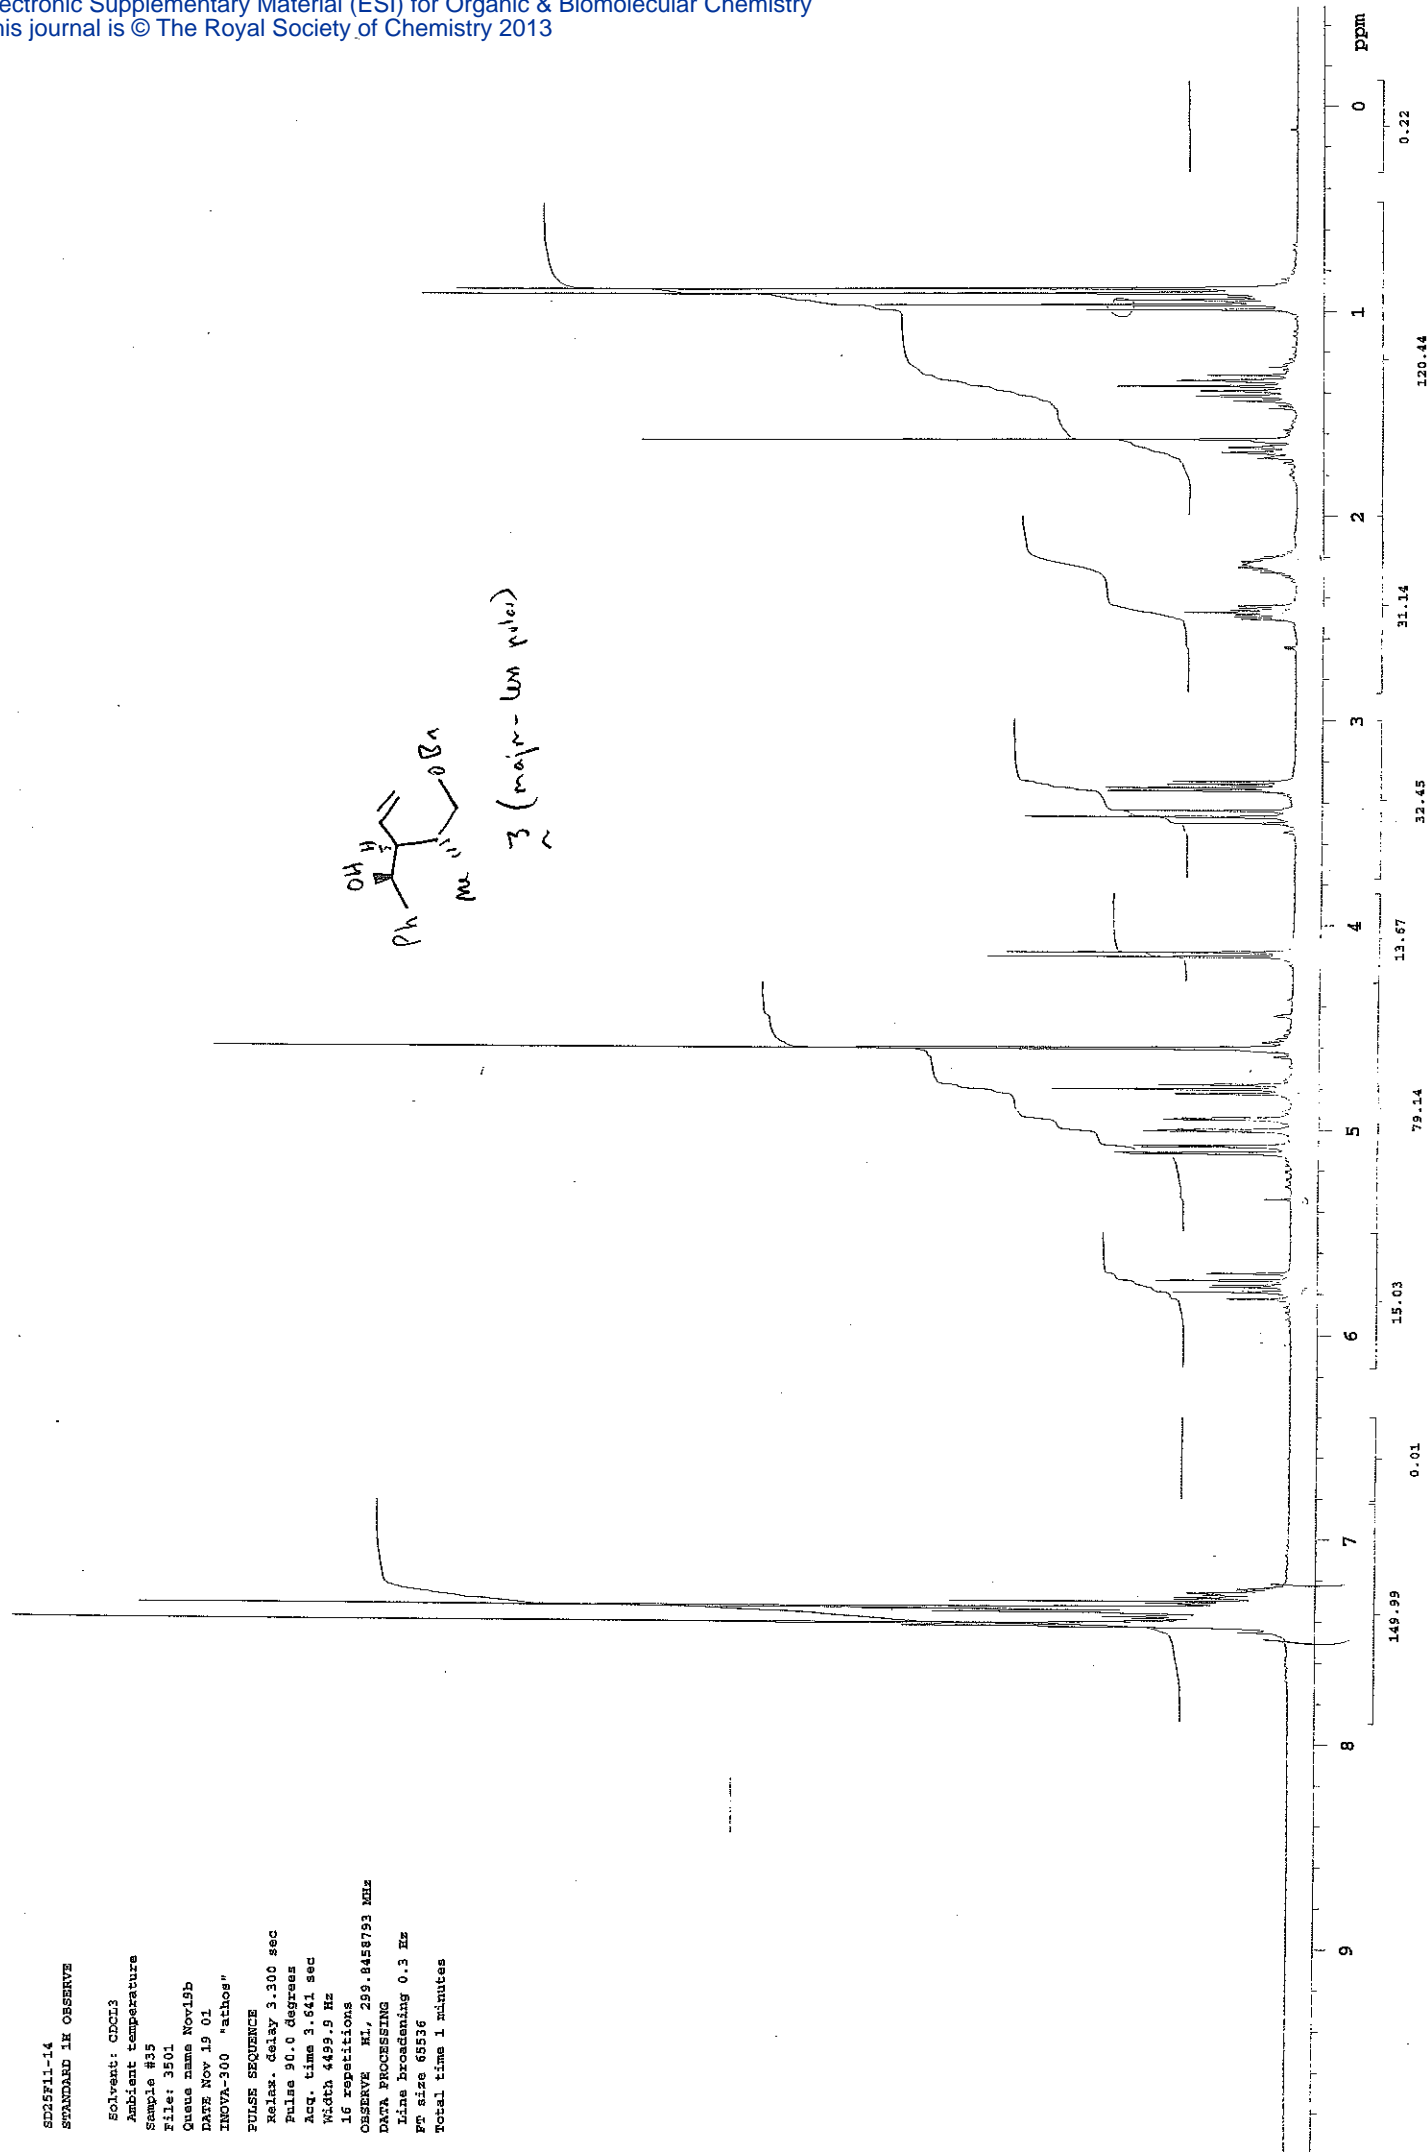

5

SIEMENS 1344

SCHUMMERLE H. 1000000000

BAJOER  
SOLLINGER  
PACHO

Solvent: CDCl<sub>3</sub>

Acquisition date: 2013-01-15

Sample ID: 435

Q1 file: 1344-2013-01-15

Q2 file: 1344-2013-01-15

Q3 file: 1344-2013-01-15

Q4 file: 1344-2013-01-15

Q5 file: 1344-2013-01-15

Q6 file: 1344-2013-01-15

Q7 file: 1344-2013-01-15

Q8 file: 1344-2013-01-15

Q9 file: 1344-2013-01-15

Q10 file: 1344-2013-01-15

Q11 file: 1344-2013-01-15

Q12 file: 1344-2013-01-15

Q13 file: 1344-2013-01-15

Q14 file: 1344-2013-01-15

Q15 file: 1344-2013-01-15

Q16 file: 1344-2013-01-15

Q17 file: 1344-2013-01-15

Q18 file: 1344-2013-01-15

Q19 file: 1344-2013-01-15

Q20 file: 1344-2013-01-15

Q21 file: 1344-2013-01-15

Q22 file: 1344-2013-01-15

Q23 file: 1344-2013-01-15

Q24 file: 1344-2013-01-15

Q25 file: 1344-2013-01-15

Q26 file: 1344-2013-01-15

Q27 file: 1344-2013-01-15

Q28 file: 1344-2013-01-15

Q29 file: 1344-2013-01-15

Q30 file: 1344-2013-01-15

Q31 file: 1344-2013-01-15

Q32 file: 1344-2013-01-15

Q33 file: 1344-2013-01-15

Q34 file: 1344-2013-01-15

Q35 file: 1344-2013-01-15

Q36 file: 1344-2013-01-15

Q37 file: 1344-2013-01-15

Q38 file: 1344-2013-01-15

Q39 file: 1344-2013-01-15

Q40 file: 1344-2013-01-15

Q41 file: 1344-2013-01-15

Q42 file: 1344-2013-01-15

Q43 file: 1344-2013-01-15

Q44 file: 1344-2013-01-15

Q45 file: 1344-2013-01-15

Q46 file: 1344-2013-01-15

Q47 file: 1344-2013-01-15

Q48 file: 1344-2013-01-15

Q49 file: 1344-2013-01-15

Q50 file: 1344-2013-01-15

Q51 file: 1344-2013-01-15

Q52 file: 1344-2013-01-15

Q53 file: 1344-2013-01-15

Q54 file: 1344-2013-01-15

Q55 file: 1344-2013-01-15

Q56 file: 1344-2013-01-15

Q57 file: 1344-2013-01-15

Q58 file: 1344-2013-01-15

Q59 file: 1344-2013-01-15

Q60 file: 1344-2013-01-15

Q61 file: 1344-2013-01-15

Q62 file: 1344-2013-01-15

Q63 file: 1344-2013-01-15

Q64 file: 1344-2013-01-15

Q65 file: 1344-2013-01-15

Q66 file: 1344-2013-01-15

Q67 file: 1344-2013-01-15

Q68 file: 1344-2013-01-15

Q69 file: 1344-2013-01-15

Q70 file: 1344-2013-01-15

Q71 file: 1344-2013-01-15

Q72 file: 1344-2013-01-15

Q73 file: 1344-2013-01-15

Q74 file: 1344-2013-01-15

Q75 file: 1344-2013-01-15

Q76 file: 1344-2013-01-15

Q77 file: 1344-2013-01-15

Q78 file: 1344-2013-01-15

Q79 file: 1344-2013-01-15

Q80 file: 1344-2013-01-15

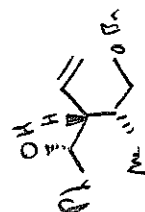

42 (minor - more polar)

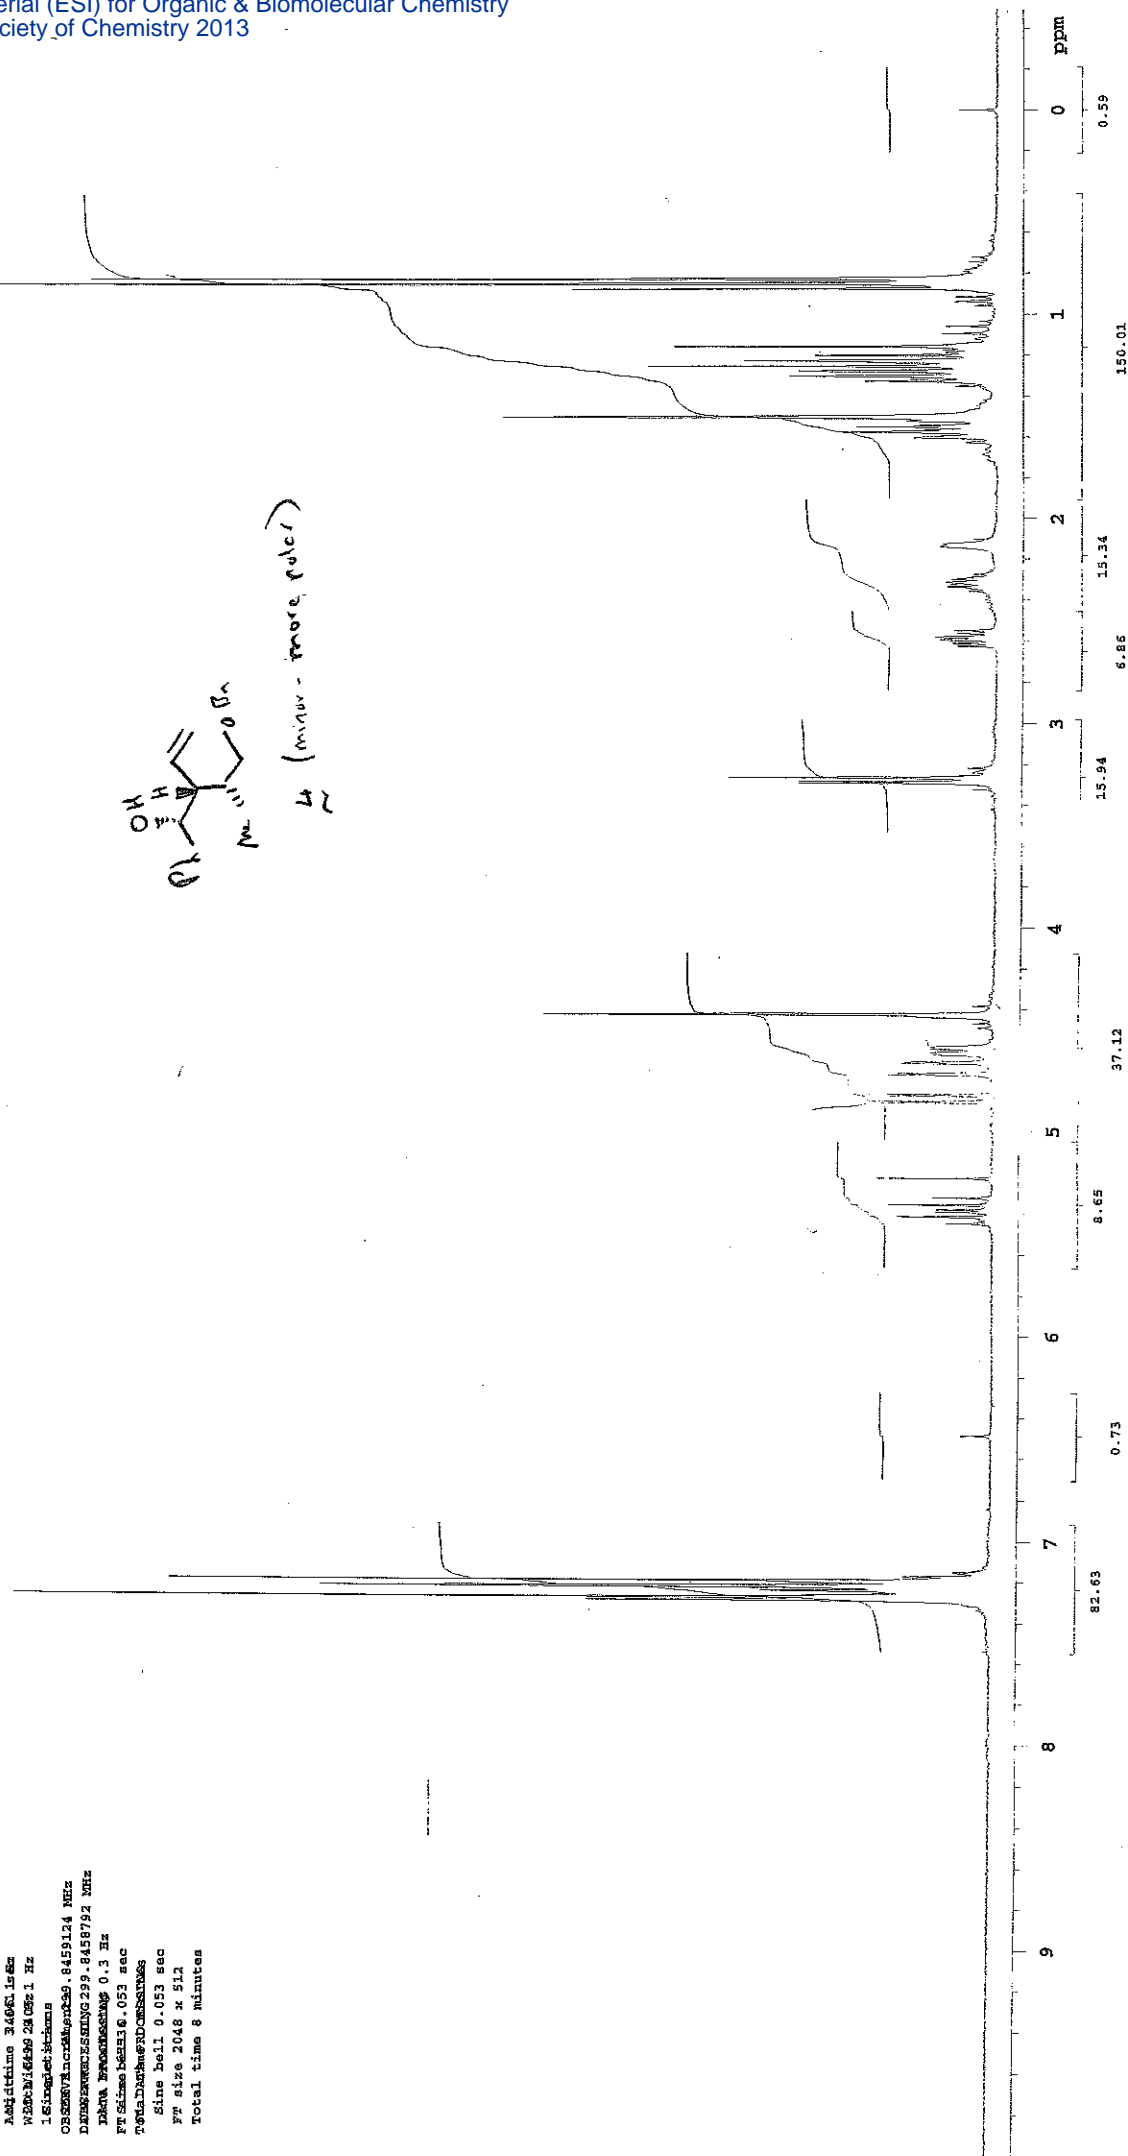

**PULSE SEQUENCE**  
Relax. delay 3.300 sec  
Pulse 90.0 degrees  
Acq. time 3.641 sec  
Width 4499.9 Hz  
16 repetitions

CC(C)(CO)C=C[C@H](O)C

5g (+ 20% loss)

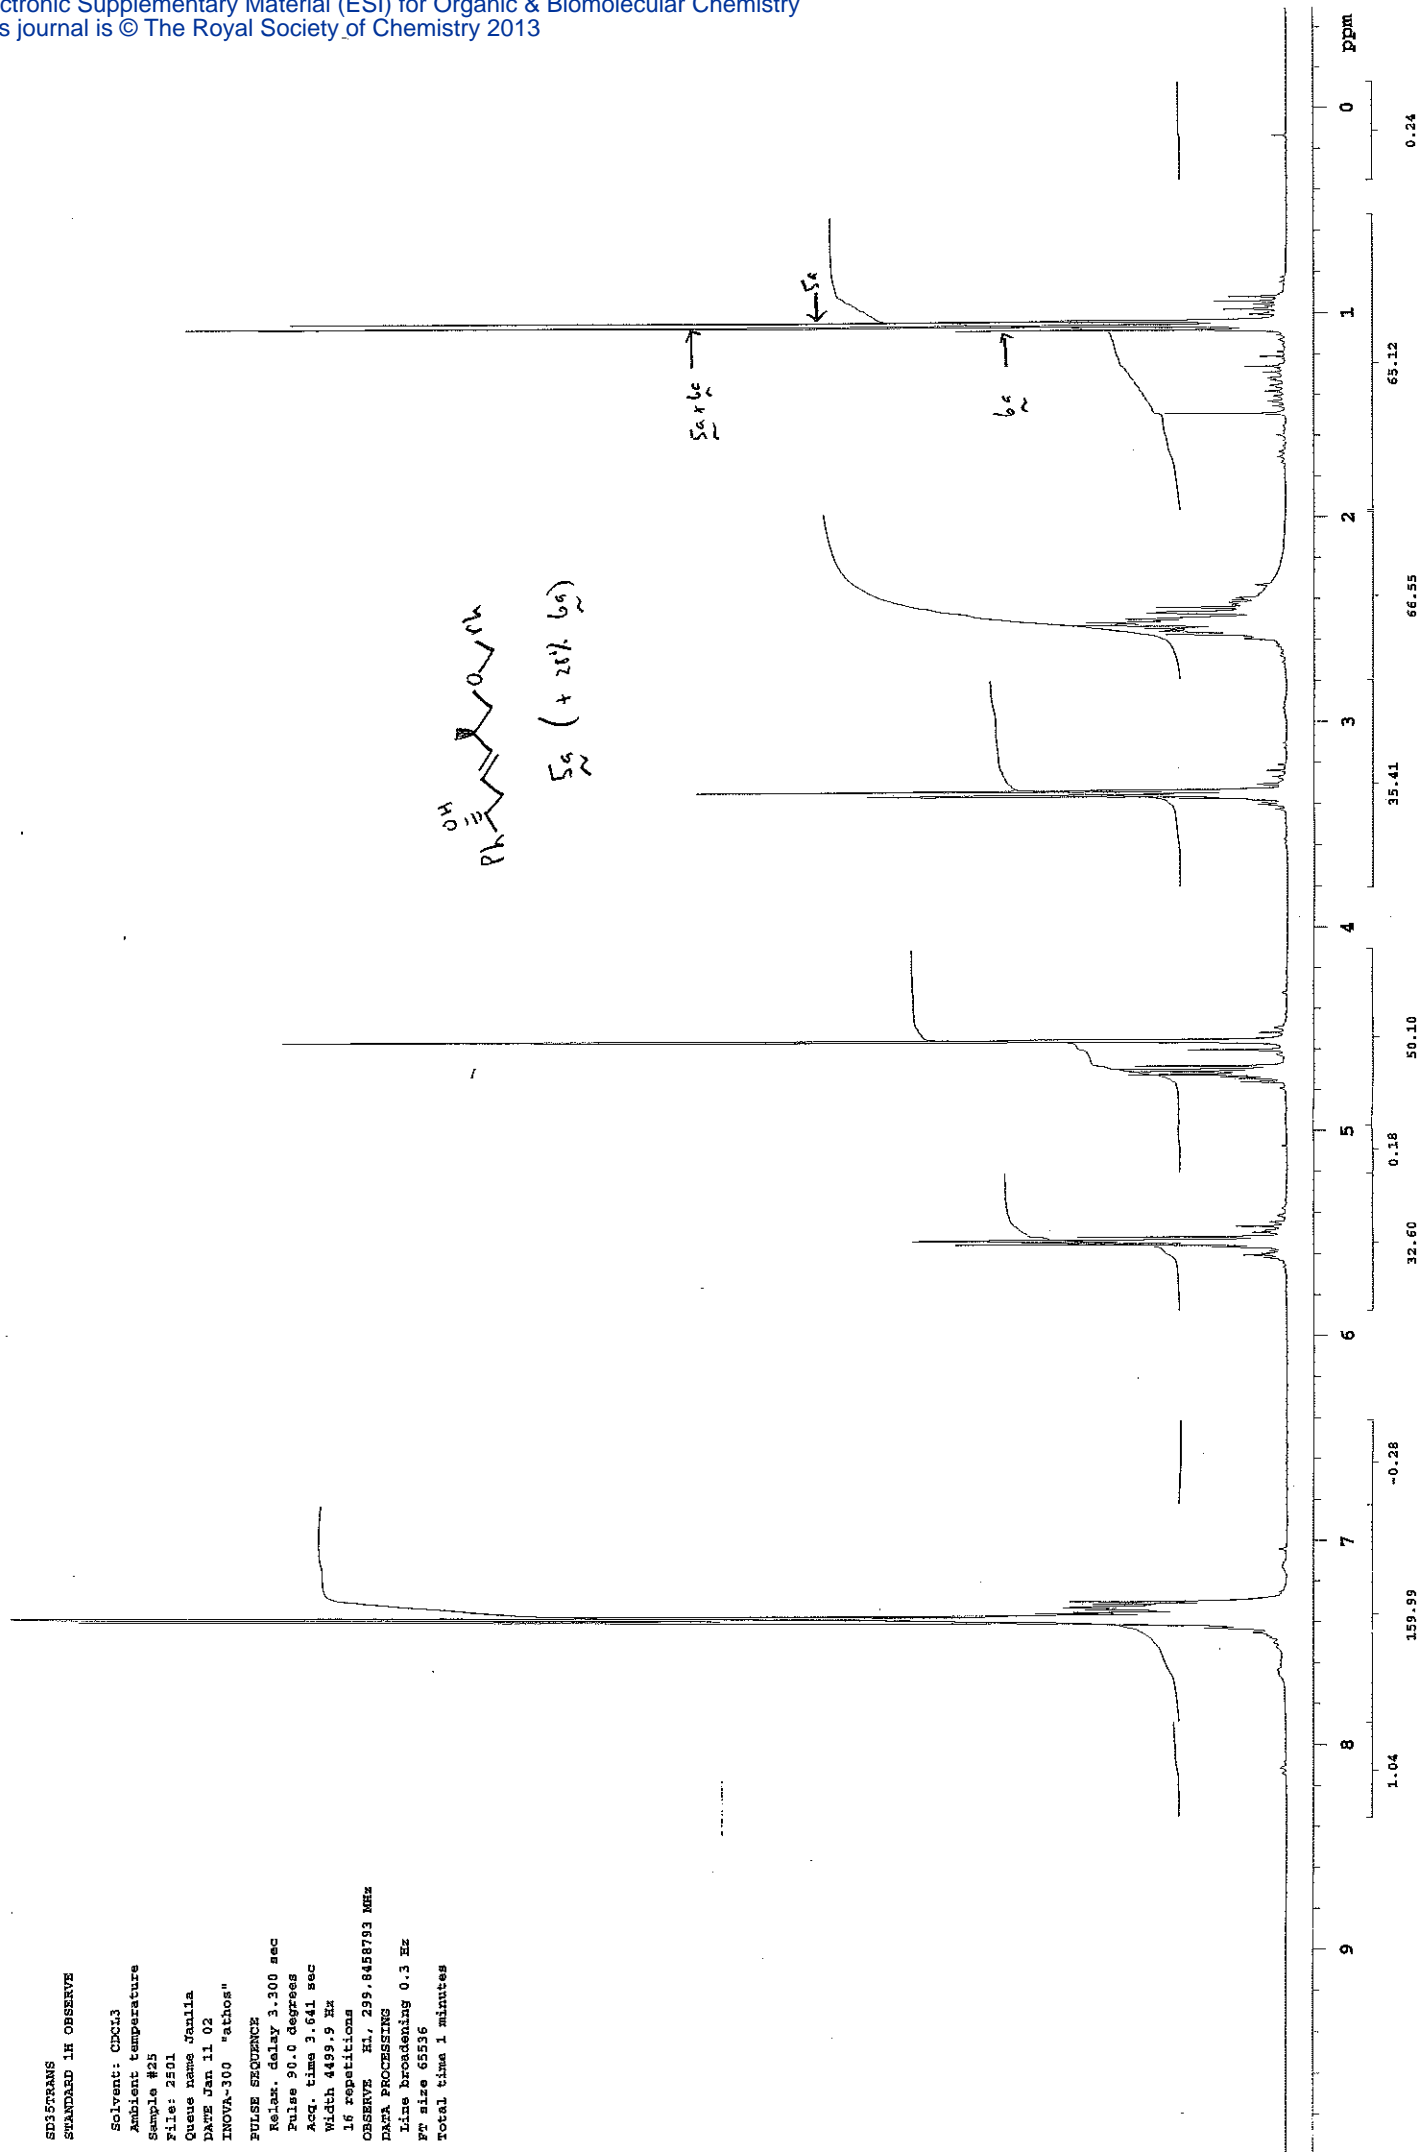

8427.1622-28  
13C OBSERVE

Solvent: CDCL3  
Ambient temperature  
Sample #31  
File: 3101  
Queue name Nov28b  
Date Nov 29 01  
INOVA-300 "athos"  
PULSE SEQUENCE  
Pulse 45.0 degrees  
Acq. time 1.638 sec  
Width 20000.0 Hz  
4096 repetitions  
OBSERVE C13, 75.3563141 MHz  
DECOUPLE E1, 299.8473785 MHz  
Power 40 dB  
continuously on  
WALTZ-16 modulated  
DATA PROCESSING  
Line broadening 1.0 Hz  
FT size 65536  
Total time 111 minutes

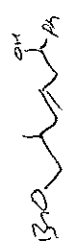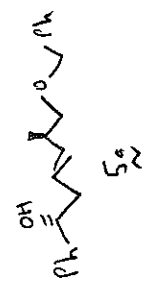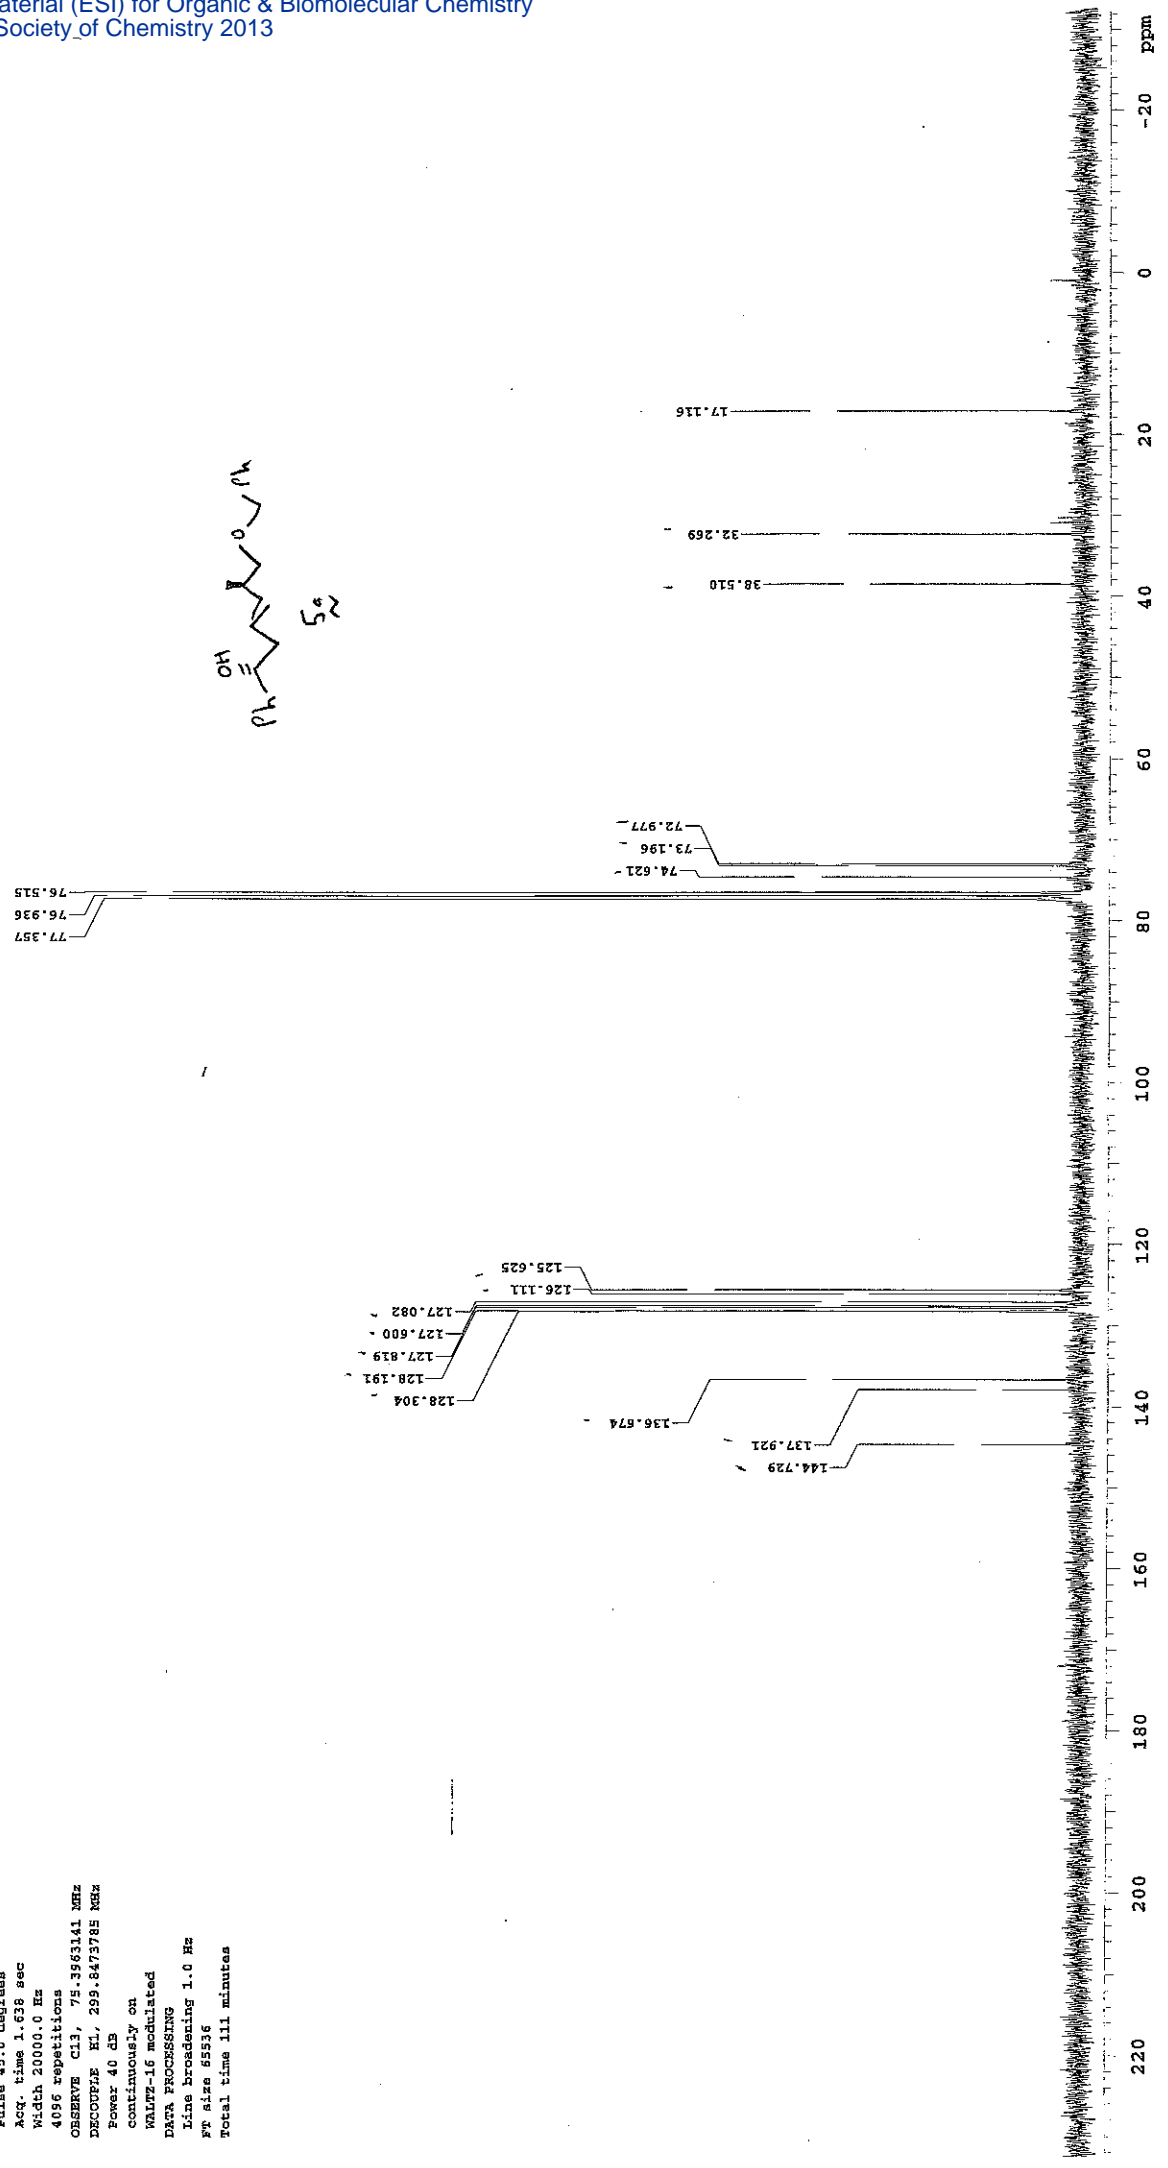

Solvent: CDCl<sub>3</sub>

52# STAIRS

Queene name Feb28a

INOVA-300 "Athog"

Relax. delay 3.300 sec

Acc. time 3.641 sec

Width 4499.9 Hz

OBSERVE AL, 291

### Line broadening

**total time 1 minutes**

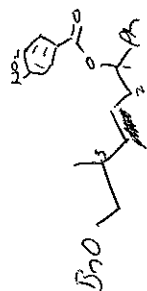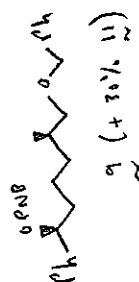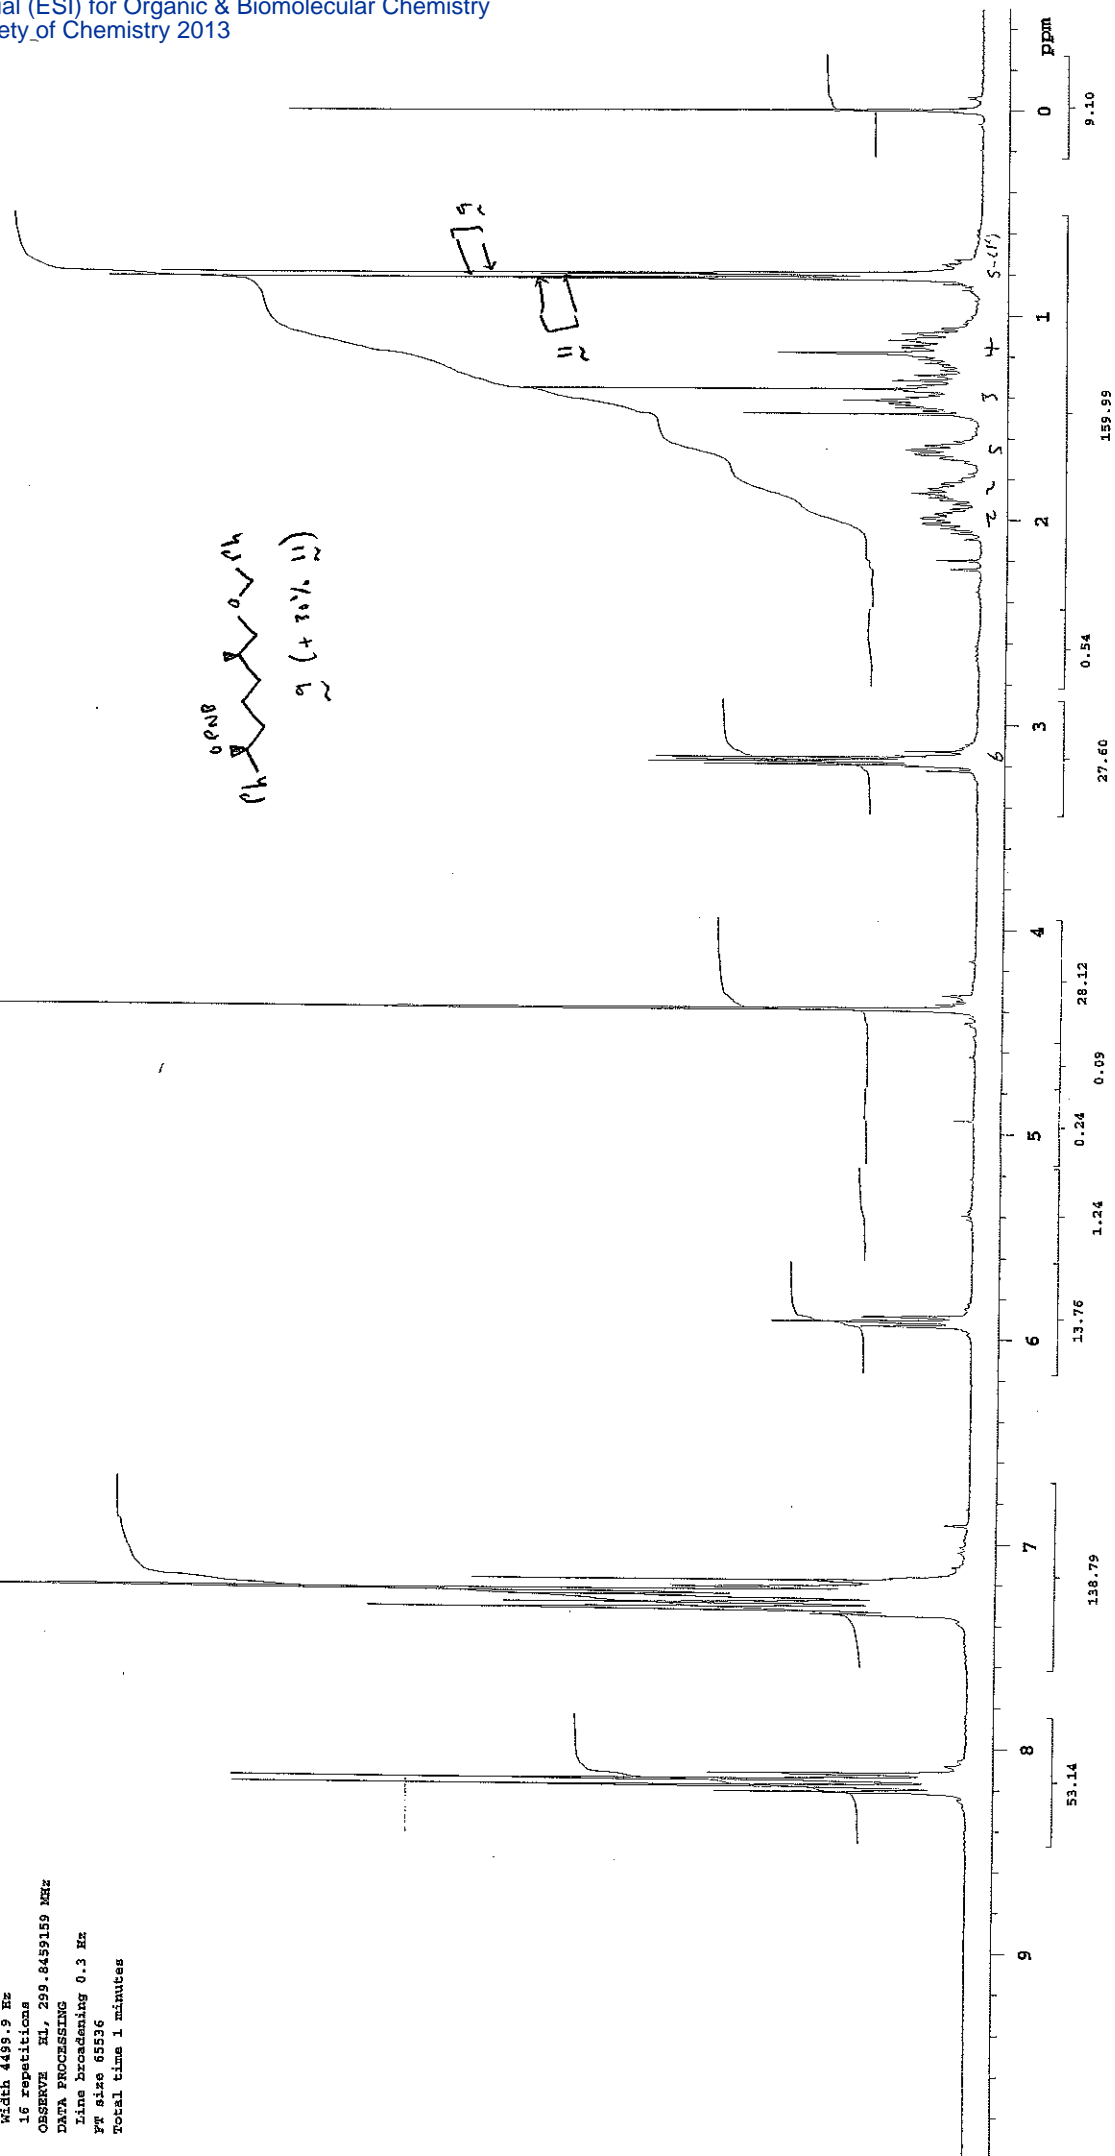

SD63 → entry same as  
SD69

Mixture 1 g ca 11

SD74  
STANDARD IN OBSERVE  
Solvent: CDCl3  
Ambient temperature  
Sample #29  
File: 2301  
Queue name Mar08b  
DATE Mar 8 02  
INOVA-300 "athos"  
PULSE SEQUENCE  
Relax. delay 3.300 sec  
Pulse 90.0 degrees  
Acq. time 3.641 sec  
Width 4499.9 Hz  
16 repetitions  
OBSERVE H1, 299.8459132 MHz  
DATA PROCESSING  
Line broadening 0.3 Hz  
FT size 65536  
Total time 1 minutes

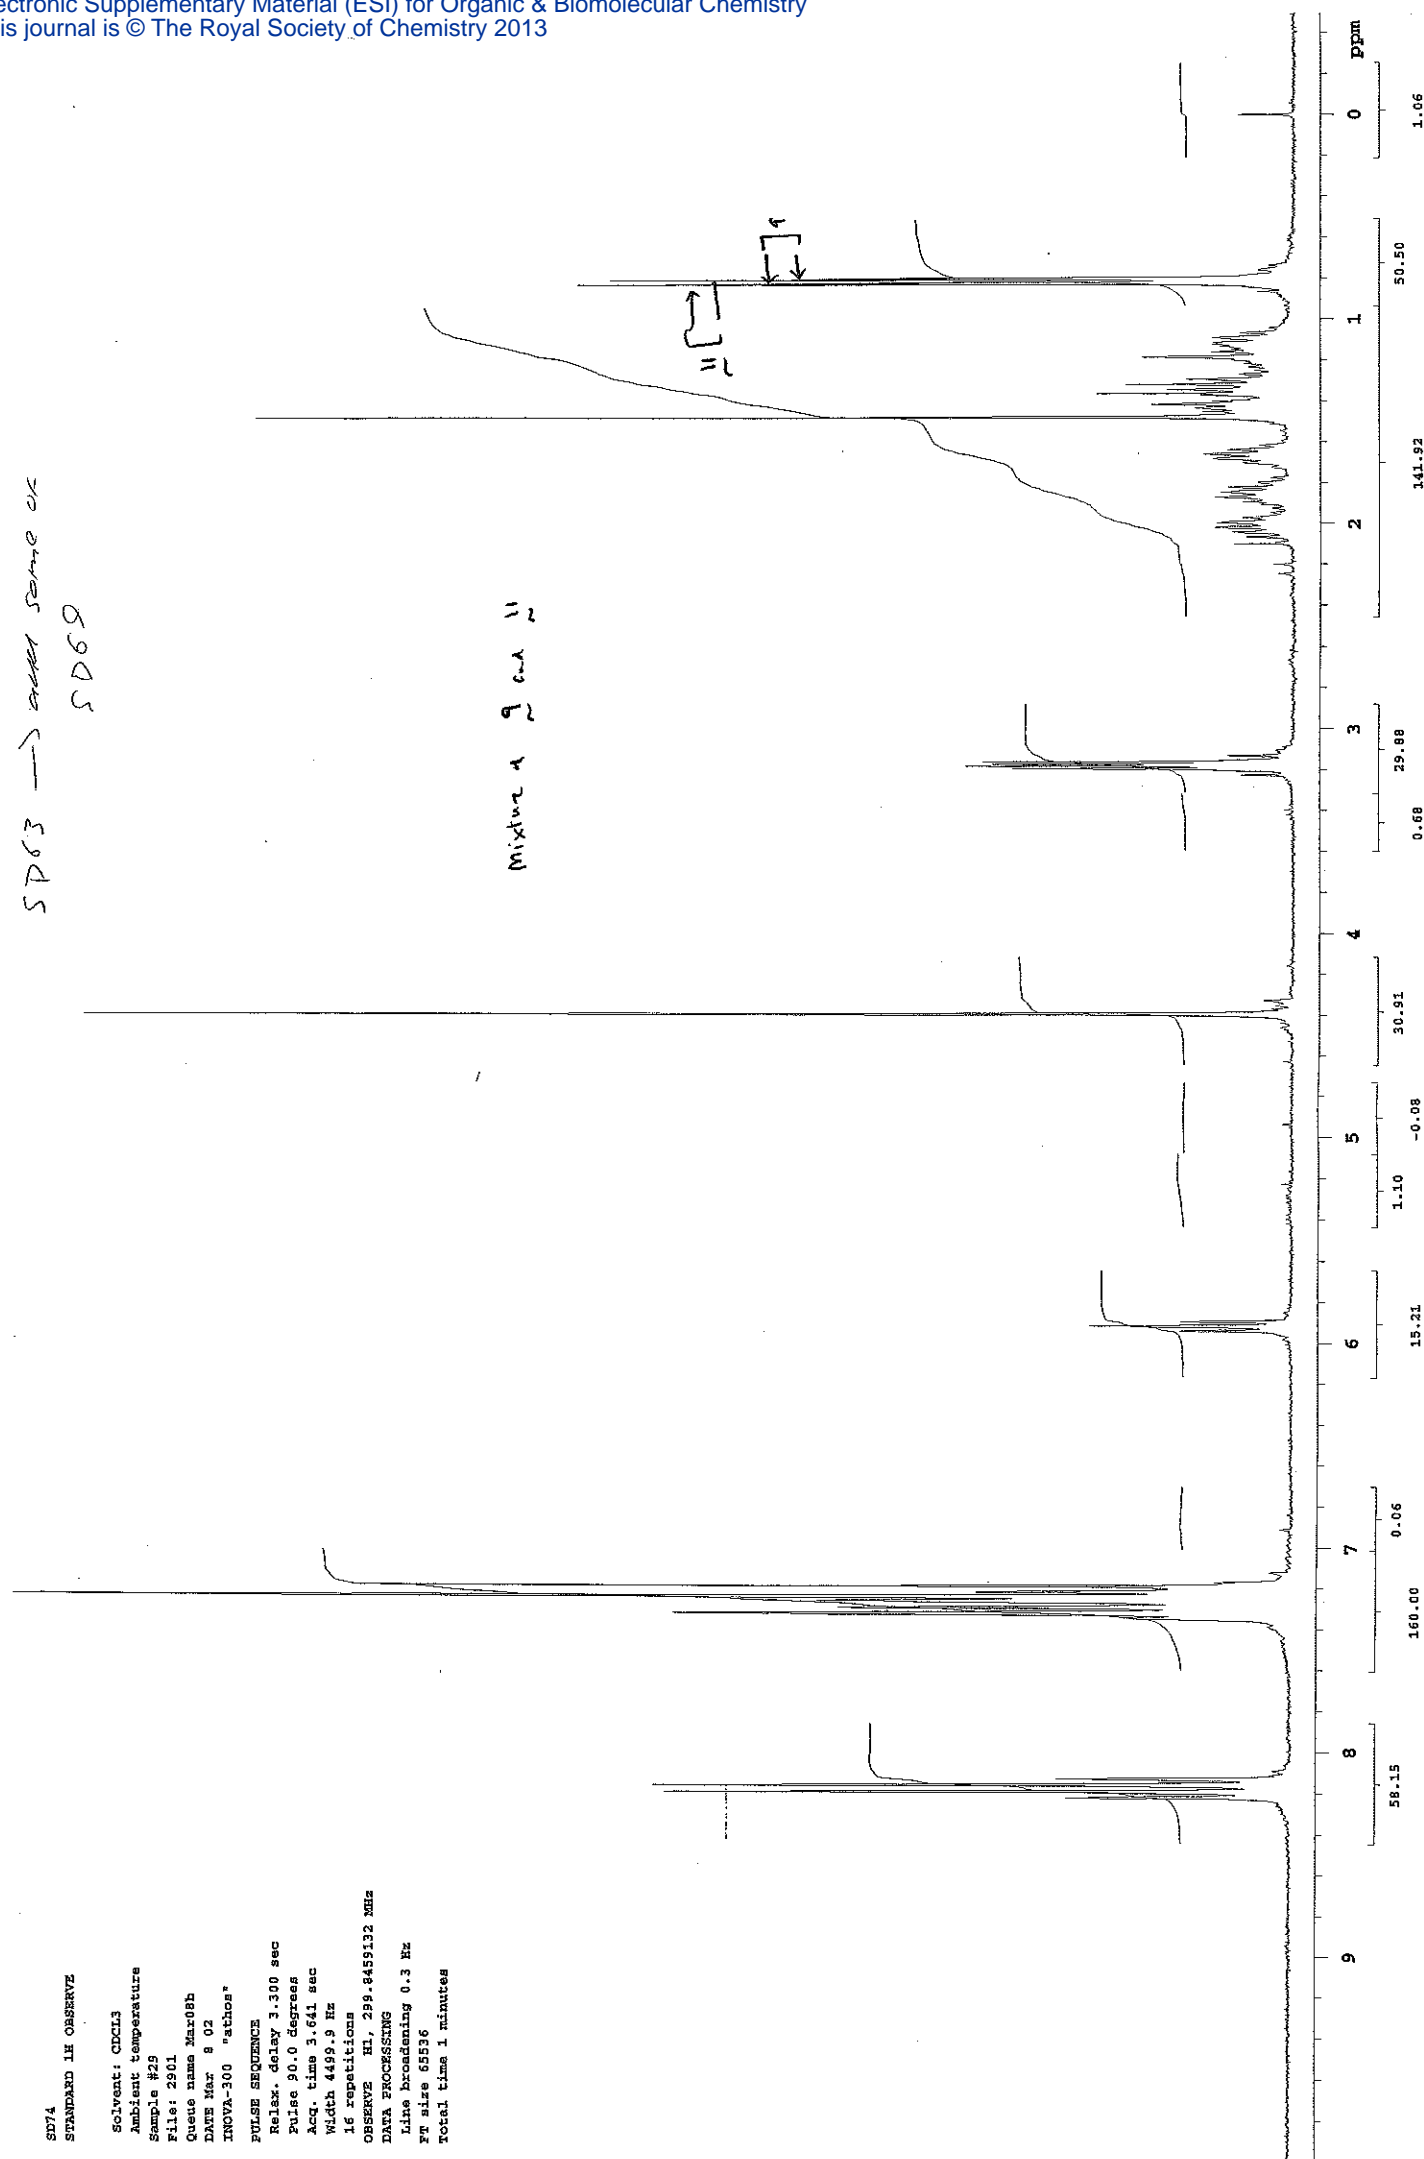

SD88CDCL3  
STANDARD 1H OBSERVE

Solvent: CDCl3  
Ambient temperature  
File: 2401  
Queue name Max28a  
DATE Mar 28 02  
INNOVA-300 "solids"

```

PULSE SEQUENCE
Relax. delay 3.300 sec
Pulse 90.0 degrees
Acq. time 3.641 sec
Width 4499.9 Hz
16 repetitions
OBSERVE XI, 299.845879
-----
DATA PROCESSING
Line broadening 0.3 Hz
FT size 65536
Total time 1 minutes

```

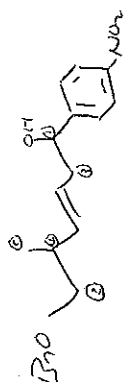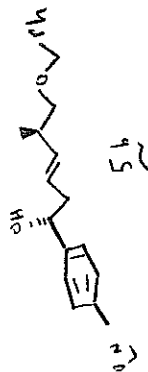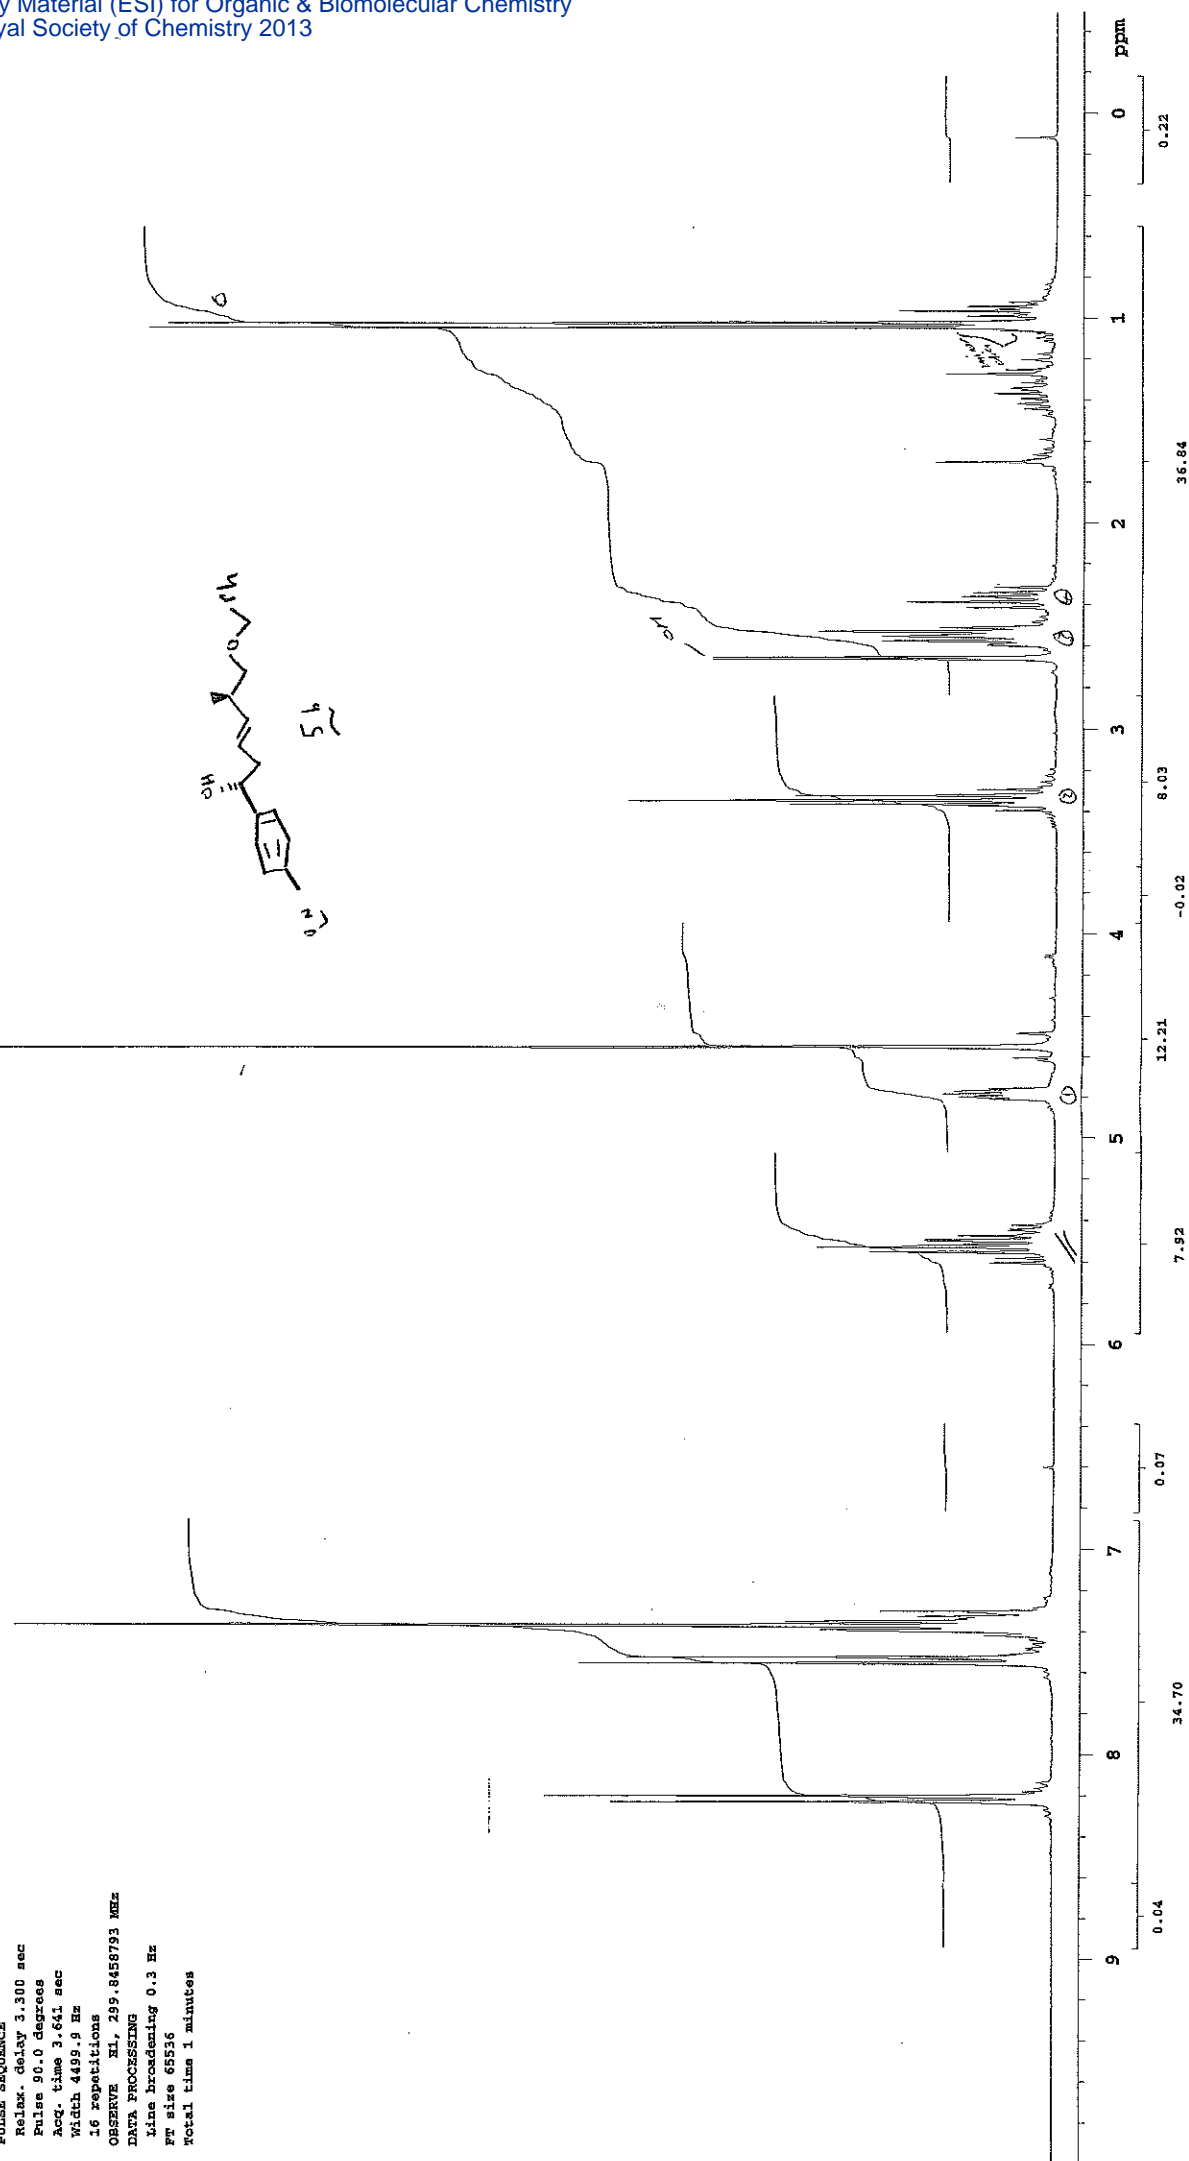

Sam Donnelly/sd450

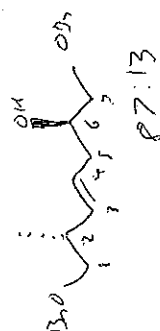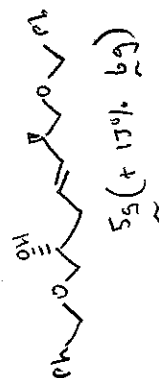

Current Data Parameters  
NAME 031017014  
EXPNO 10  
PROCNO 1  
USER pdd

F2 - Acquisition Parameters  
Date\_ 20031017  
Time 20.15  
INSTRUM dpx400  
PROBHD 5 mm QNP 1H/1  
PULPROG zg45  
TD 65536  
SOLVENT CDCl3  
NS 32  
DS 0  
SWH 7062.147 Hz  
FIDRES 0.107760 Hz  
AQ 4.639989 sec  
RG 32  
DW 70.800 usec  
DE 5.00 usec  
TE 300.0 K  
D1 5.36000013 sec

===== CHANNEL f1 =====  
NUC1 1H  
P1 9.50 usec  
PL1 -3.00 dB  
SF01 400.1324710 MHz

F2 - Processing parameters  
SI 65536  
SF 400.1300482 MHz  
WDW EM  
SSB 0  
LB 0.19 Hz  
GB 0  
PC 1.00

1D NMR plot parameters  
CX 33.00 cm  
F1P 10.000 ppm  
F1 4001.30 Hz  
F2P 0.000 ppm  
F2 0.00 Hz  
PPMCM 0.30303 ppm/cm  
HZCM 121.25153 Hz/cm

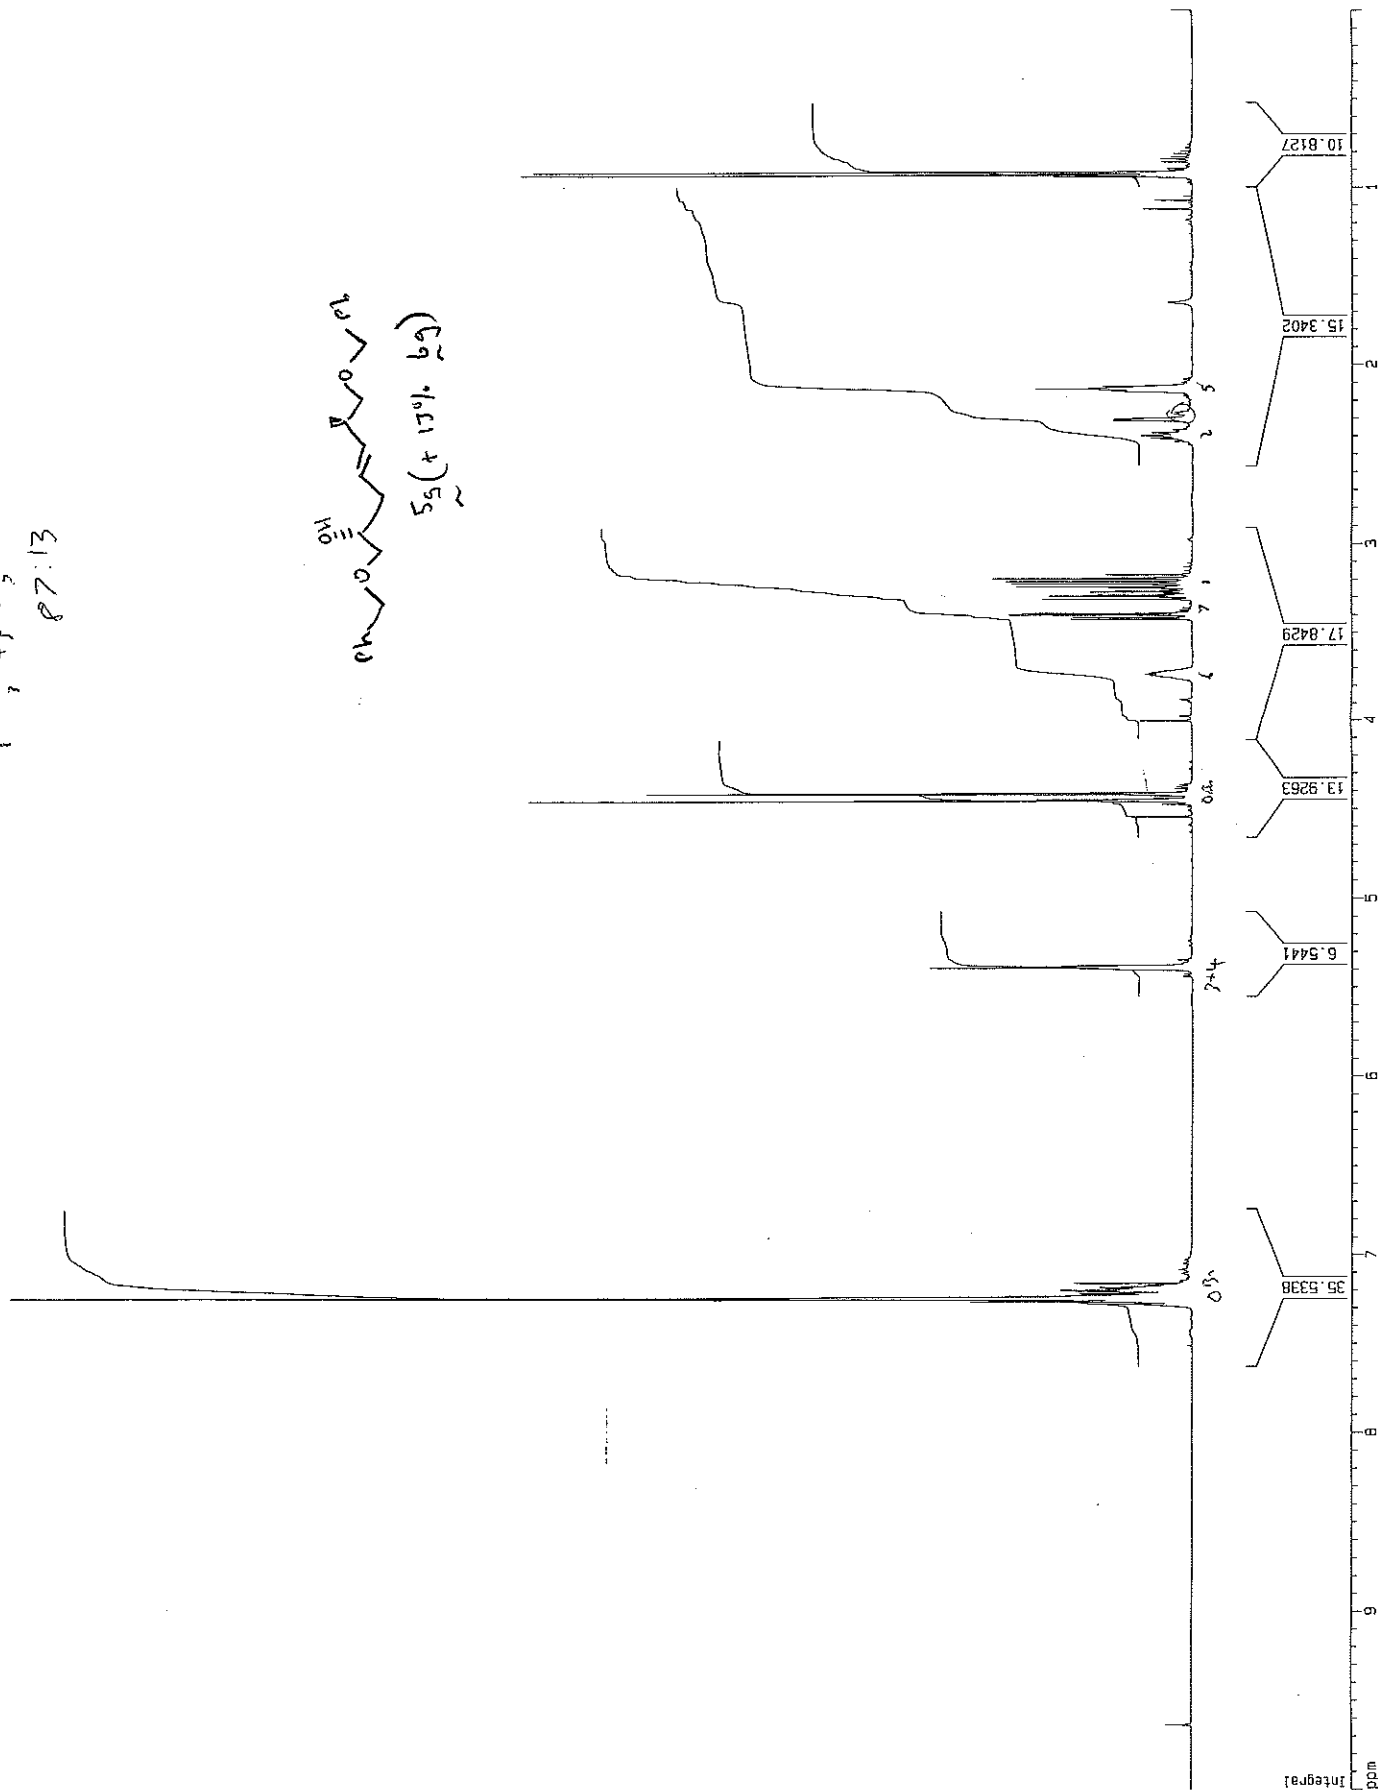



---

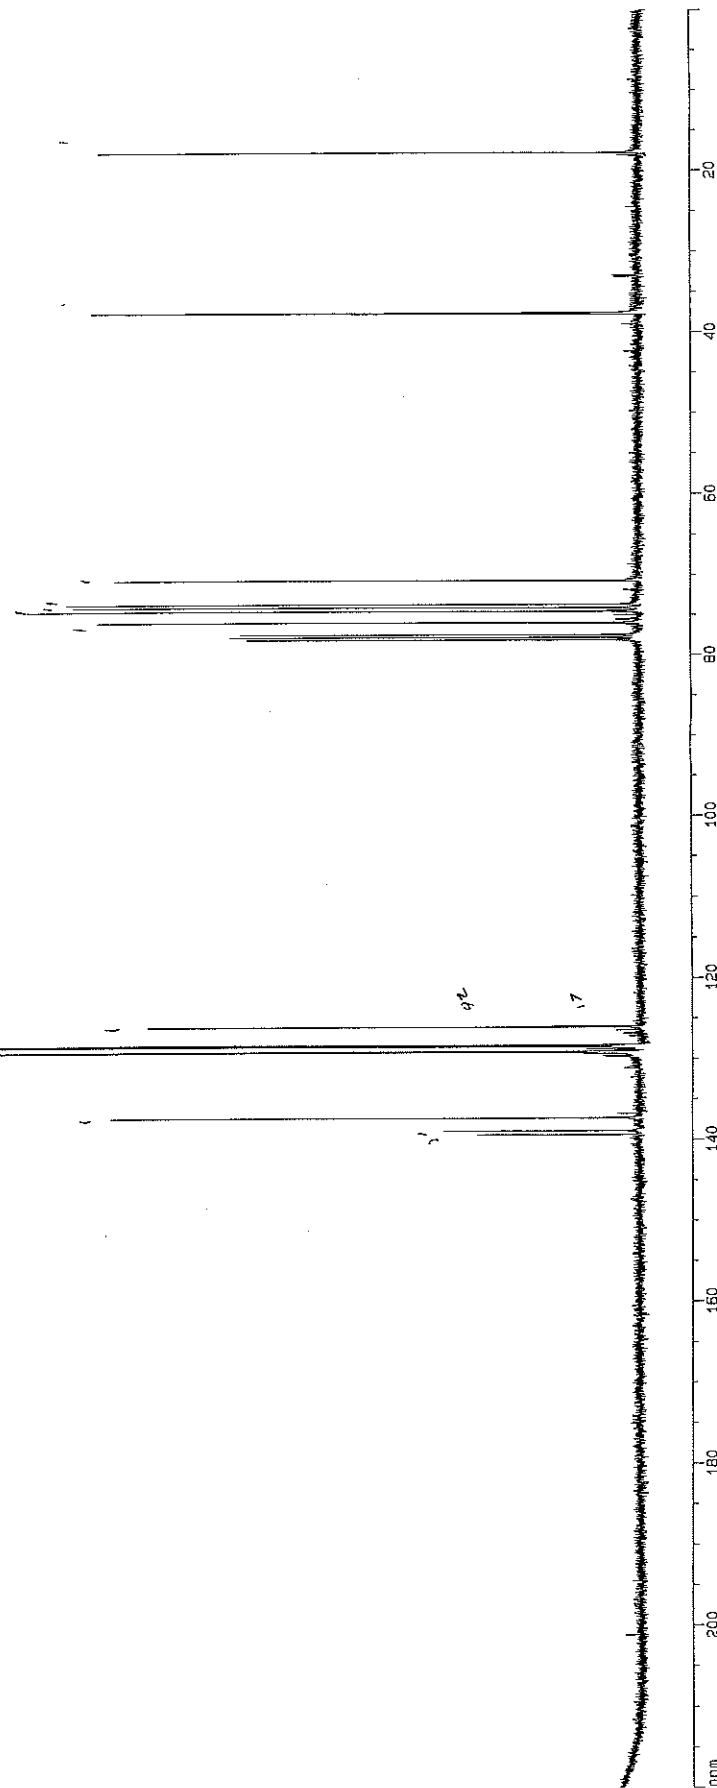

Sam Donnelly/sd435f2

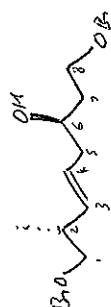

52

Current Data Parameters  
NAME 031003034  
EXPNO 10  
PROCNO 1  
USER pdd

F2 - Acquisition Parameters  
Data... 20031004  
Time 0.19  
INSTRUM dpx400  
PROBHD 5 mm GNP 1H/1  
PULPROG zg45  
TD 65536  
SOLVENT CDCl3  
NS 32  
DS 0  
SWH 7052.147 Hz  
FIDRES 0.107750 Hz  
AQ 4.6399989 sec  
RG 71.8  
DW 70.800 usec  
DE 5.00 usec  
TE 300.0 K  
D1 5.36000013 sec

===== CHANNEL f1 =====  
NUC1 1H  
P1 9.50 usec  
PL1 -3.00 dB  
SF01 400.1324710 MHz

F2 - Processing parameters  
SI 65536  
SF 400.1300136 MHz  
WDW EM  
SSB 0  
LB 0.19 Hz  
GB 0  
PC 1.00

1D NMR plot parameters  
CX 33.00 cm  
F1P 10.000 ppm  
F1 4001.30 Hz  
F2P 0.000 ppm  
F2 0.00 Hz  
PPMCM 0.30303 ppm/cm  
HZCM 121.25152 Hz/cm

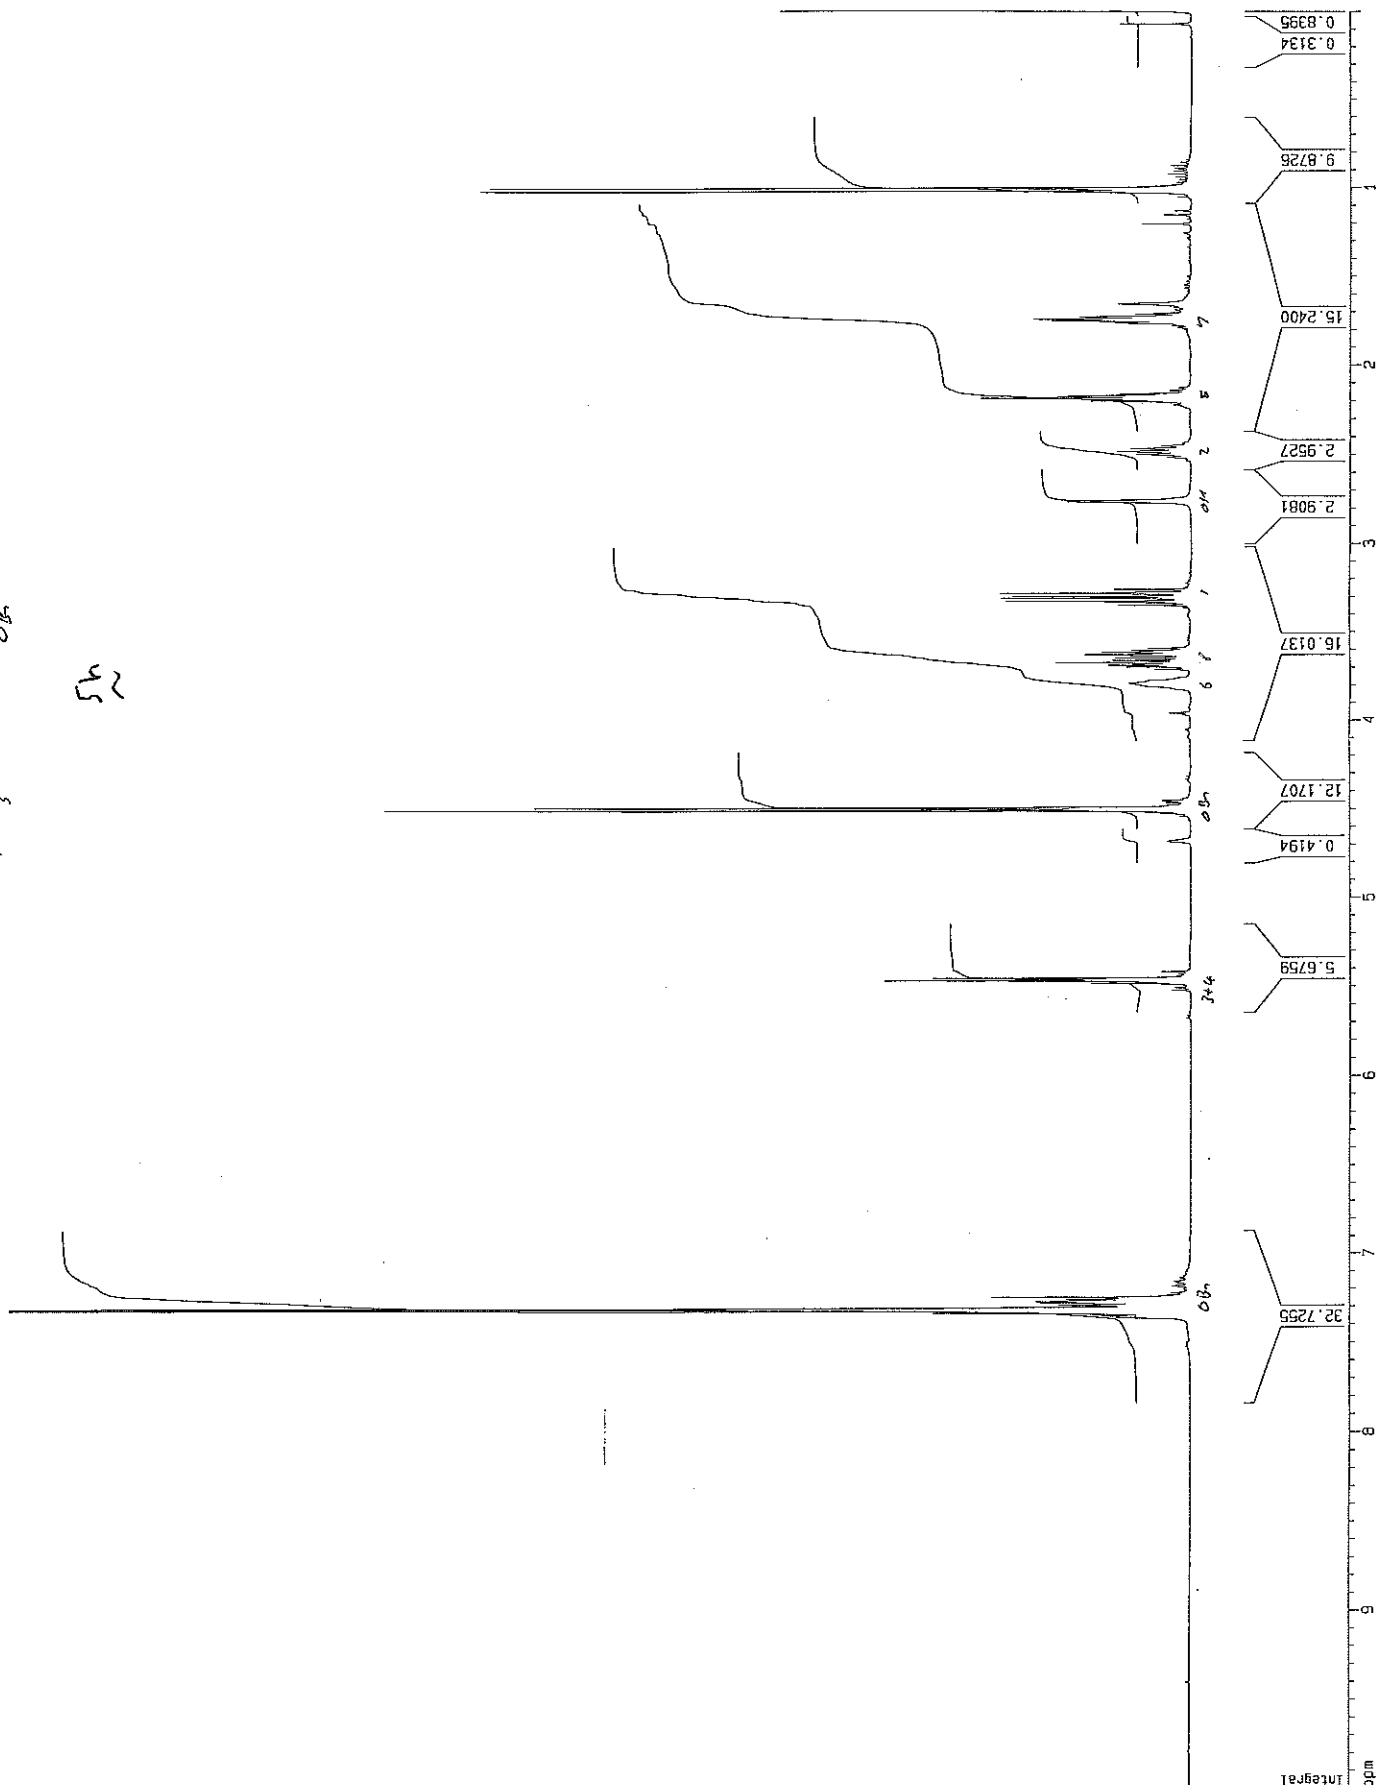

Sam Donnelly/sd435f1

Current Data Parameters  
NAME 031003033  
EXPNO 12  
PROCNO 1  
USER pdd

F2 - Acquisition Parameters  
Date\_ 20031004  
Time 0.02  
INSTRUM cdx400  
PROBHD 5 mm QNP 1H/1  
PULPROG zgpg45  
TD 65536  
SOLVENT CDCl3  
NS 800  
DS 2  
SWH 24691.357 Hz  
FIDRES 0.376750 Hz  
AQ 1.3271540 sec  
RG 322.5  
DW 20.250 usec  
DE 5.00 usec  
TE 300.0 K  
D1 0.69999999 sec  
D11 0.03000000 sec  
D12 0.00002000 sec

===== CHANNEL f1 =====  
NUC1 13C  
P1 7.70 usec  
PL1 -3.00 dB  
SFO1 100.6227903 MHz

===== CHANNEL f2 =====  
CPOPRG2 waltz16  
NUC2 1H  
PCPD2 90.00 usec  
PL2 -3.00 dB  
PL12 18.00 dB  
PL13 19.00 dB  
SFO2 400.1315005 MHz

F2 - Processing parameters  
SI 65536  
SF 100.6128641 MHz  
WDW EM  
SSB 0  
LB 1.00 Hz  
GB 0  
PC 1.40

1D NMR plot parameters  
CX 33.00 cm  
F1P 220.000 ppm  
F1 22134.83 Hz  
F2P 0.000 ppm  
F2 0.00 Hz  
PPMCM 6.66667 ppm/cm  
HZCM 670.75244 Hz/cm

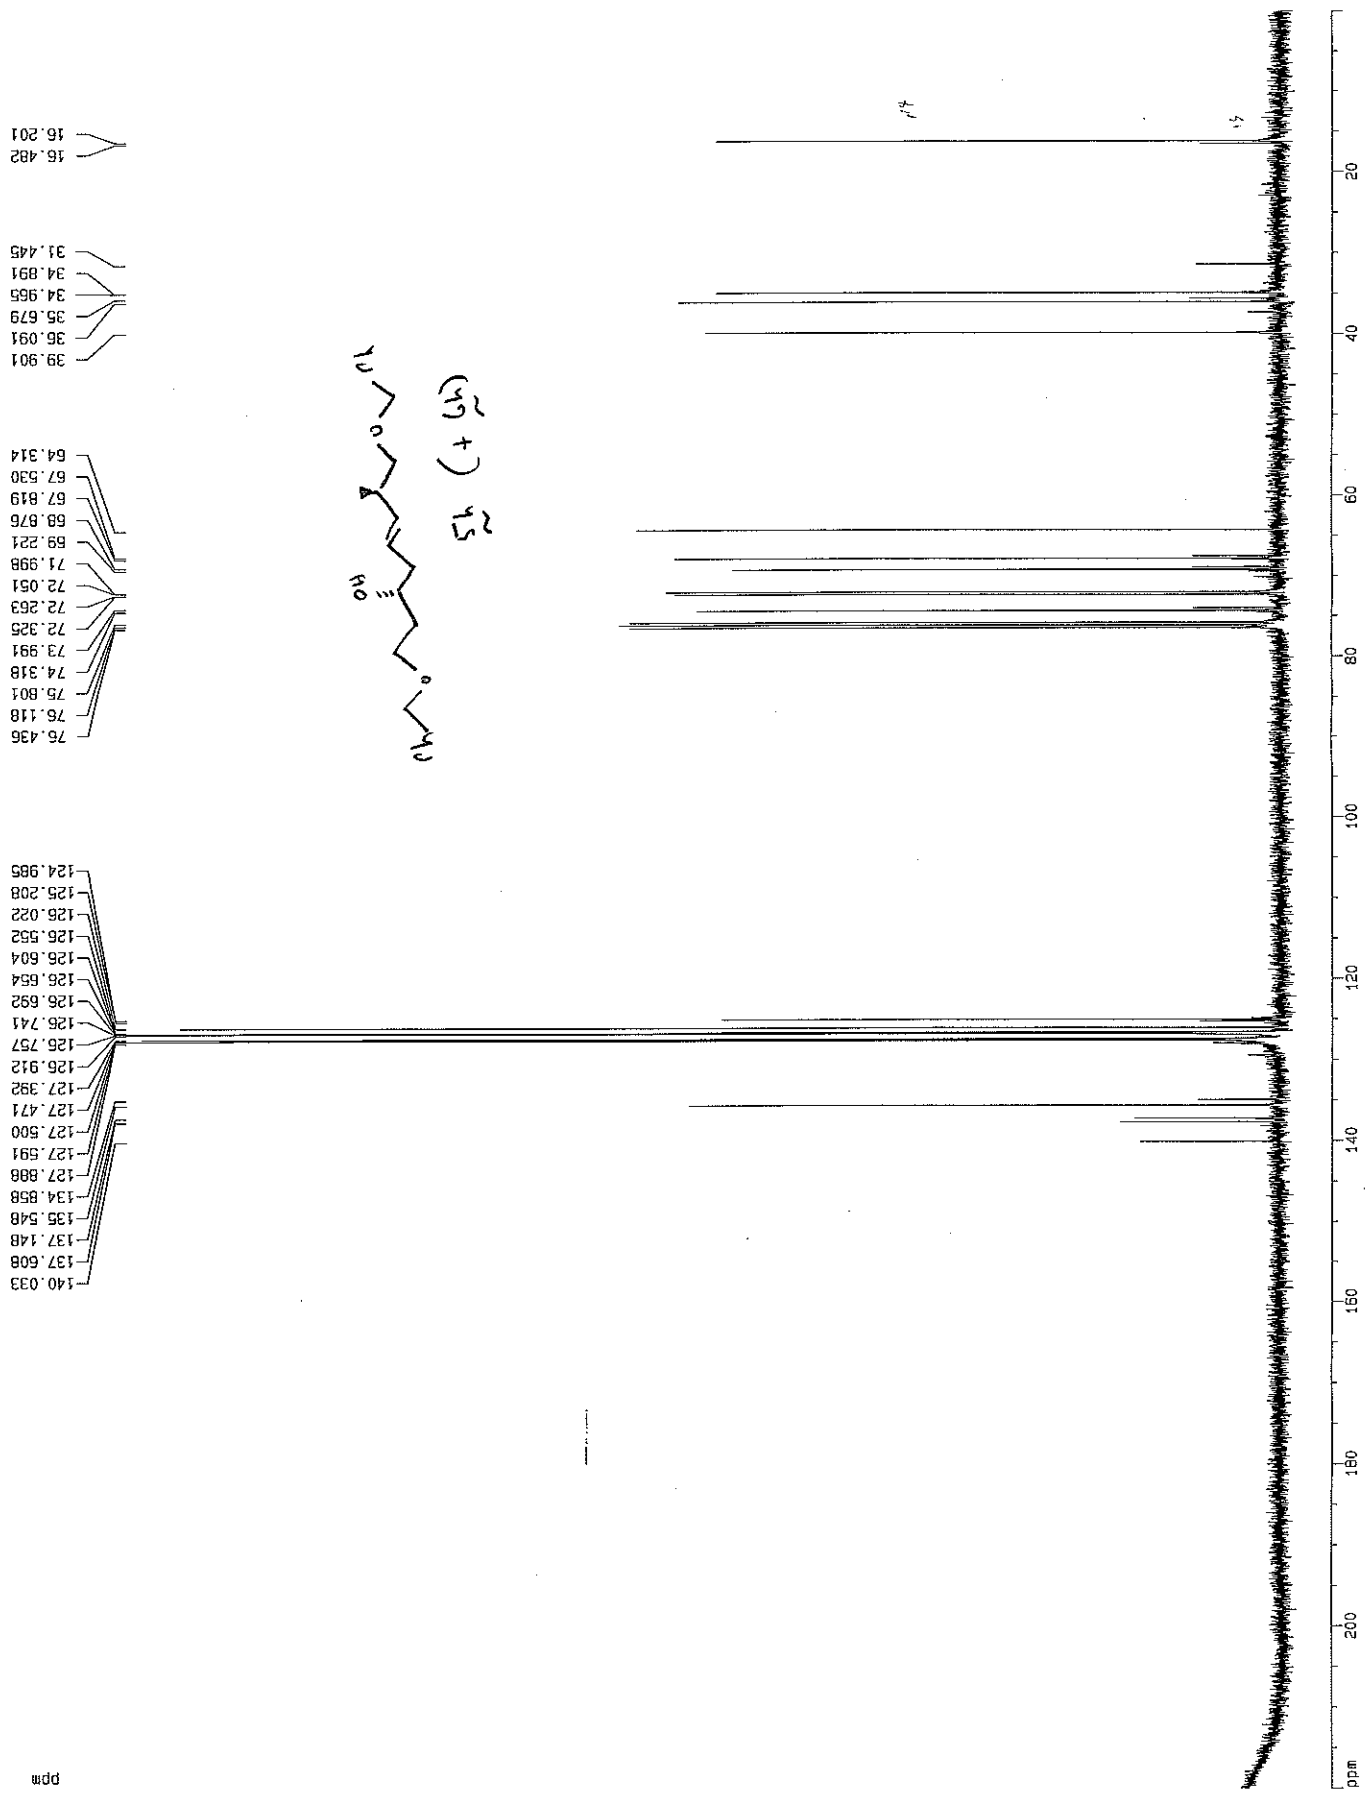

ad12122  
STANDARD IN OBSERVE

Automation directory: /data/Vul09  
File : 3401

Pulse Sequence: s2pul  
Solvent: cdcl3  
Ambient temperature  
Sample #34  
File: 3401  
INOVA-300 "ratty"

Relax. delay 1.000 sec  
Pulse 45.0 degrees  
Acq. time 3.744 sec  
Width 4797.6 Hz  
16 repetitions

OBSERVE XL, 299.8458792 MHz  
DATA PROCESSING  
Ft size 65536  
Total time 1 min, 16 sec

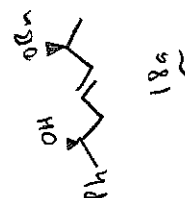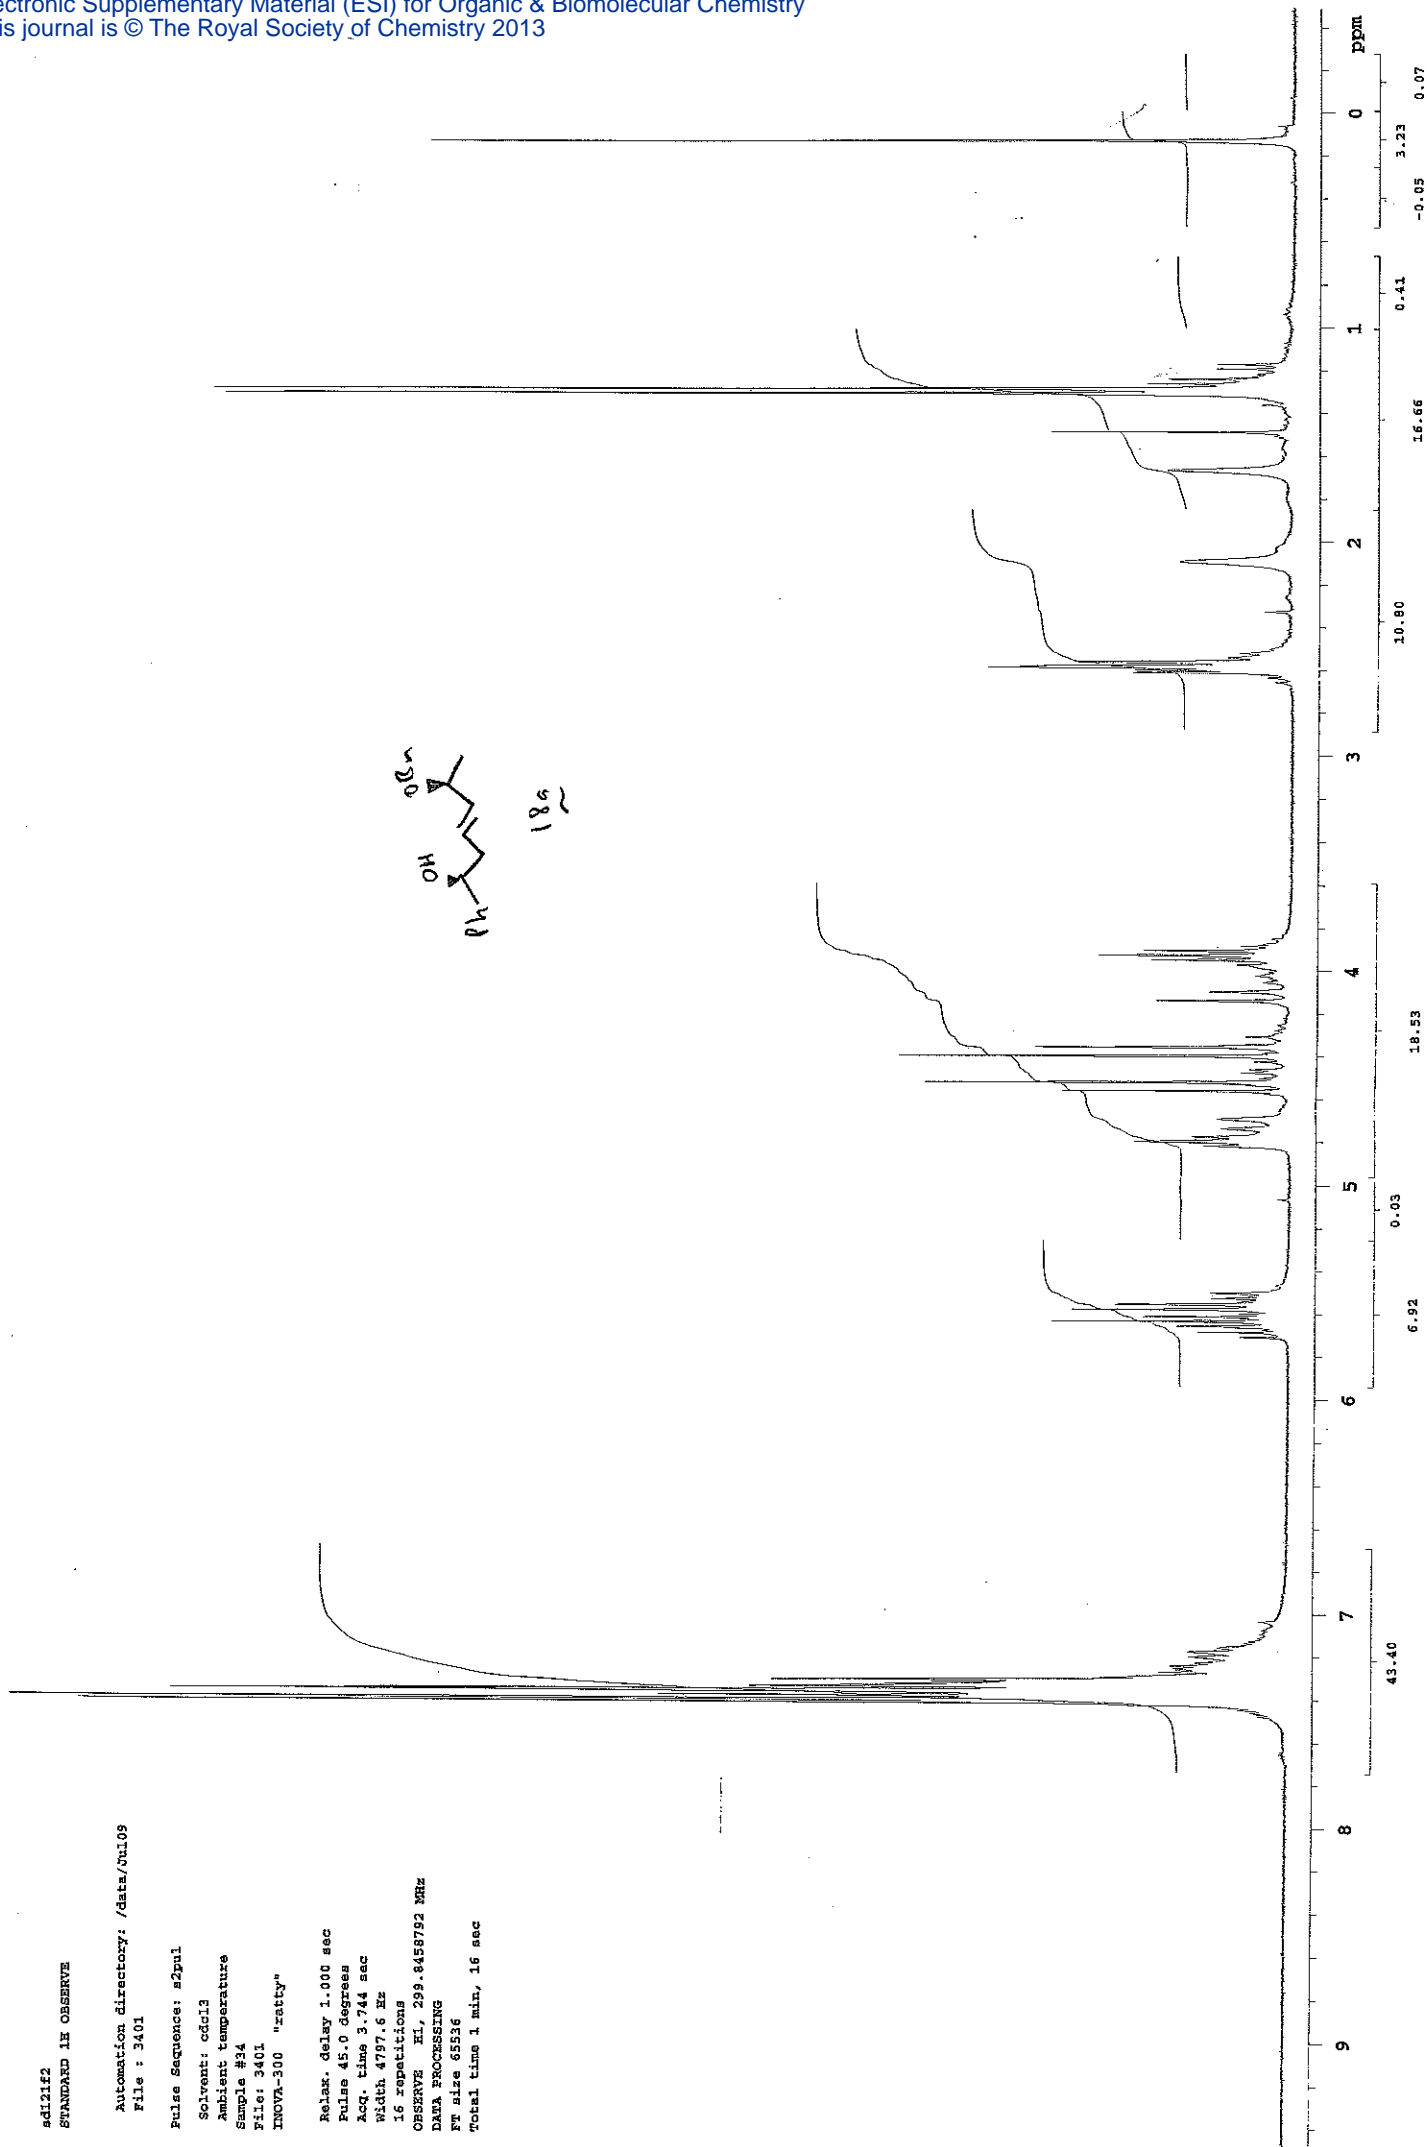

sd121f2  
STANDARD 1H OBSERVE  
Automation directory: /data/Jul09  
File : 3402  
Pulse Sequence: s2pul  
Solvent: cdcl3  
Ambient temperature  
Sample #34  
File: 3402  
INOVA-300 "ratty"  
Relax. delay 1.000 sec  
Pulse 45.0 degrees  
Acq. time 1.815 sec  
Width 18850.1 Hz  
256 repetitions  
OBSERVE CH3, 75.3962883 MHz  
DECOUPLE H1, 299.8473786 MHz  
Power 37 dB  
continuously on  
WALTZ-16 modulated  
DATA PROCESSING  
Line broadening 1.0 Hz  
FT size 131072  
Total time 12 min, 2 sec

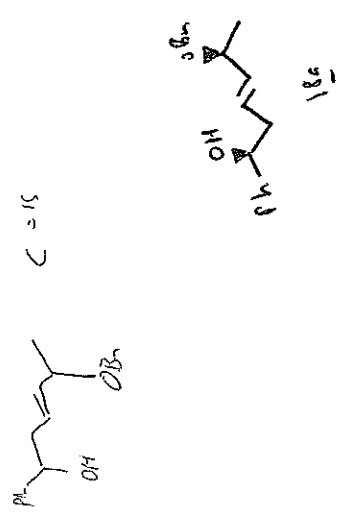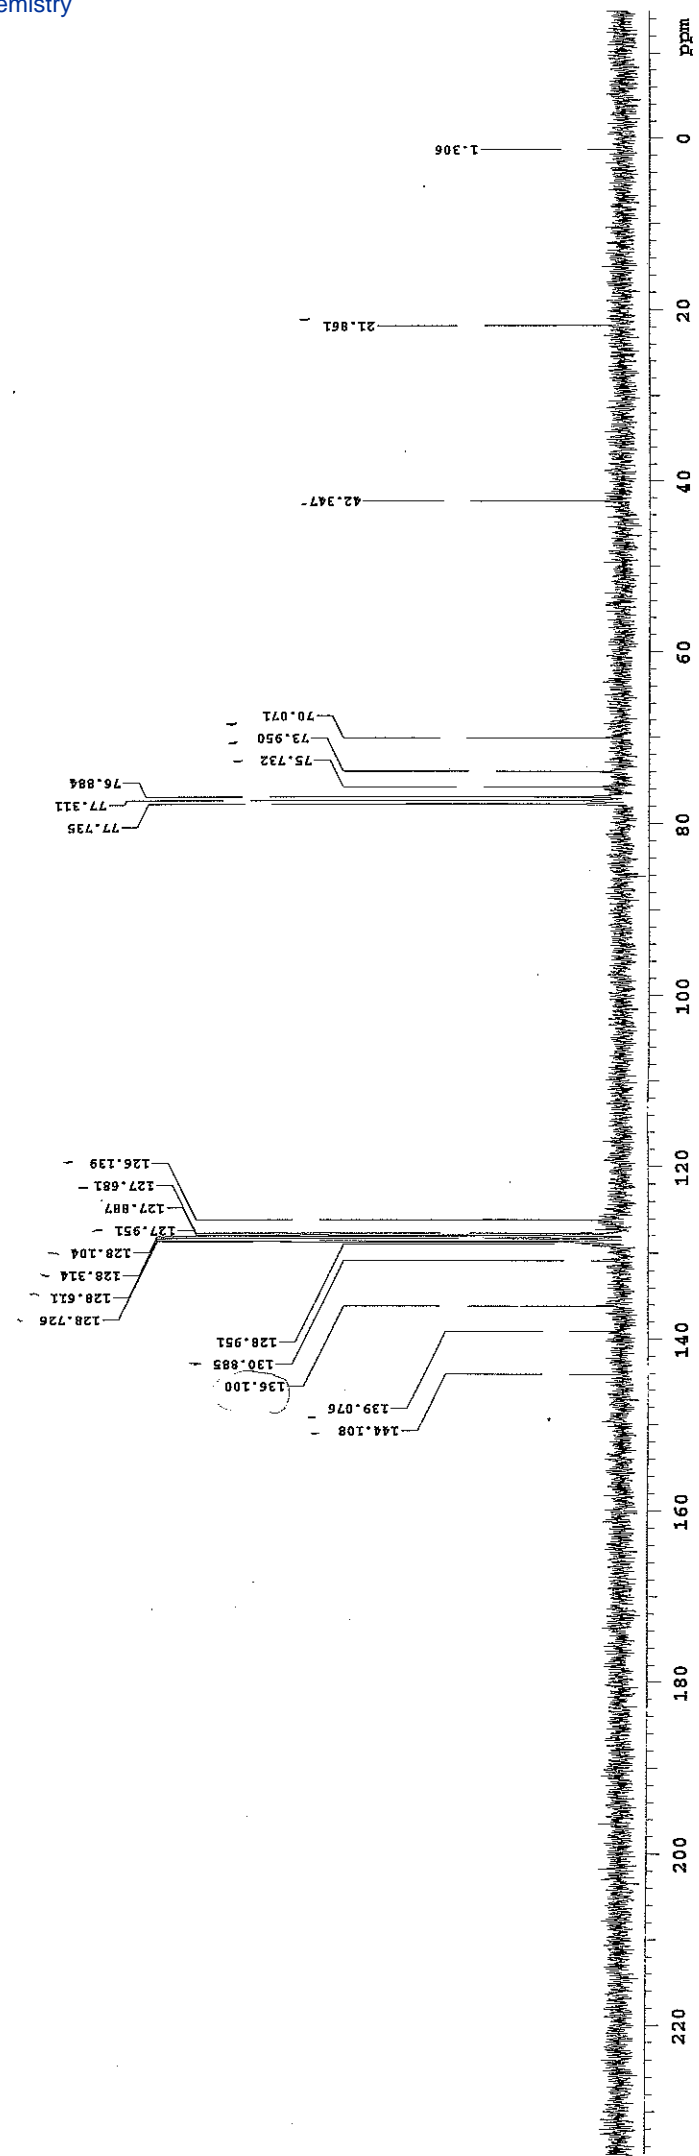

nb006  
STANDARD 1H OBSERVE

Automation directory: /data/nmrdata/Sep16  
File : 3601

Pulse Sequence: zgpg30  
Solvent: cdcl3  
DATE Sep 16 2005  
Sample #36  
File: 3601  
INNOVA-300 "zatty"

Relax. delay 1.000 sec  
Pulse 45.0 degrees  
Acq. time 3.744 sec  
Width 4797.6 Hz  
16 repetitions  
OBSERVE E1, 299.8458792 MHz  
DATA PROCESSING  
FT size 65536  
Total time 1 min, 16 sec

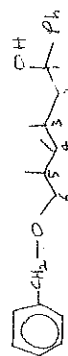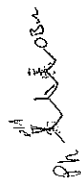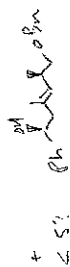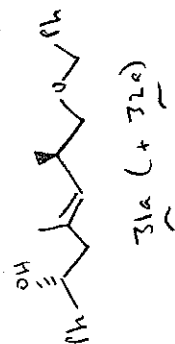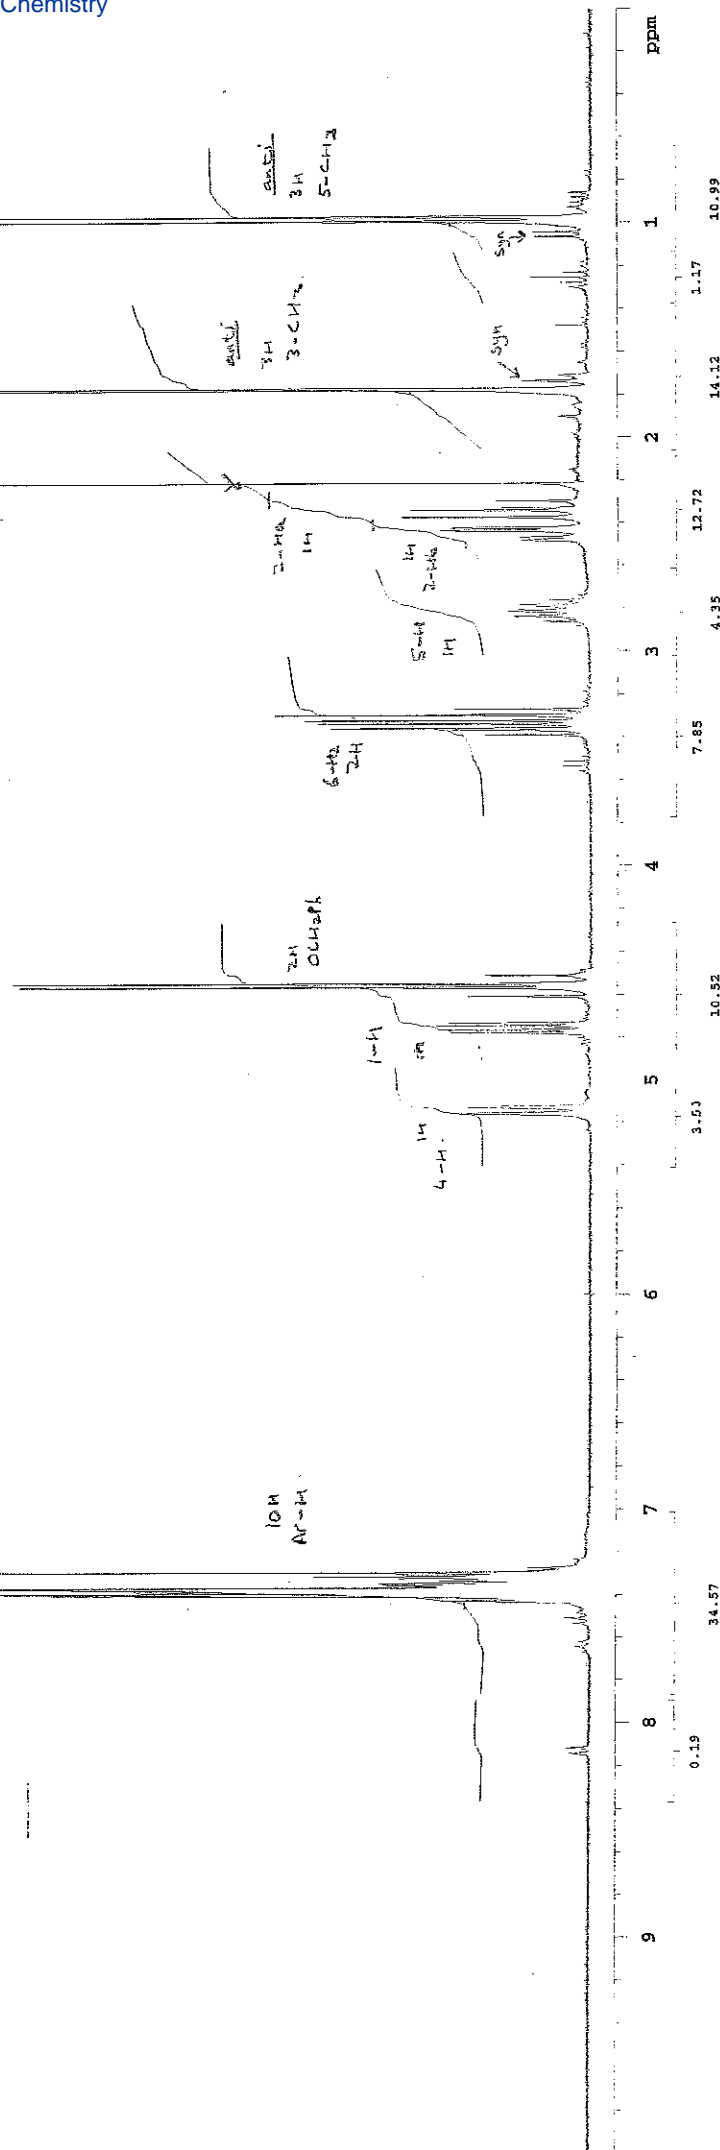

zb006  
STANDARD IN OBSERVE

Automation directory: /data/mrdata/Sep19  
File : 4102

Pulse Sequence: s2pul  
Solvent: cdcl3  
DATE Sep 20 2005  
Sample #41  
File: 4102  
INNOVA-300 "ratty"

Relax. delay 1.000 sec  
Pulse 45.0 degrees  
Acq. time 1.815 sec  
Width 18850.1 Hz  
256 repetitions  
OBSERVE C13, 75.3962883 MHz  
DECOUPLE H1, 299.8473786 MHz  
Power 37 dB  
continuously on  
WALTZ-16 modulated  
DATA PROCESSING  
Line broadening 1.0 Hz  
Ft size 131072  
Total time 12 min, 2 sec

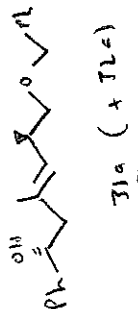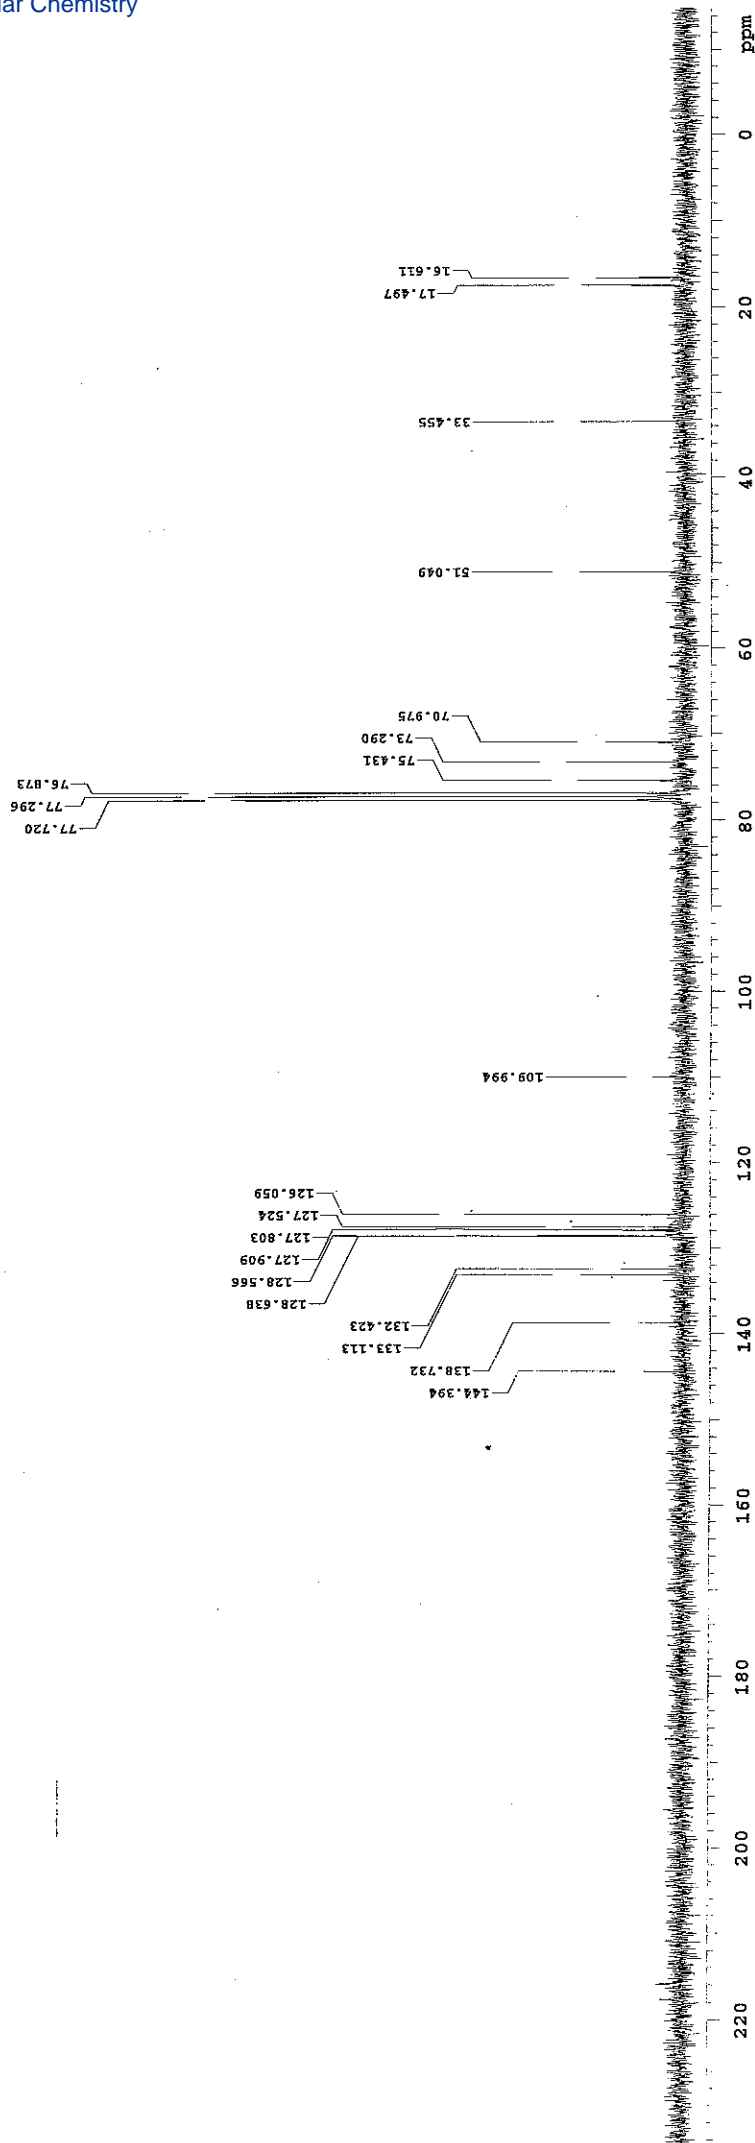

Automation directory: /data/nmrdata/Sep23

File : 4501

Pulse Sequence: s2pul

Solvent: cdcl3

DATE Sep 25 2005

Sample #45

File: 4502

NOVA-300 "zatty"

Relax. delay 1.000 sec

**Schedule D - Estimated Tax**

PAGE NO.: 00077668  
Acc. time 3,744 sec

ACQ. FILE 3-744 SEC  
WITH 4797-6 HZ

Width 497.6 Hz

16 repetitions

OBSERVE HL, 299.8458792 MHz

## DATA PROCESSING

WY size 65536

Total time 1 min, 16 sec

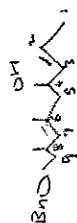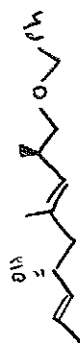

$-316(+326)$

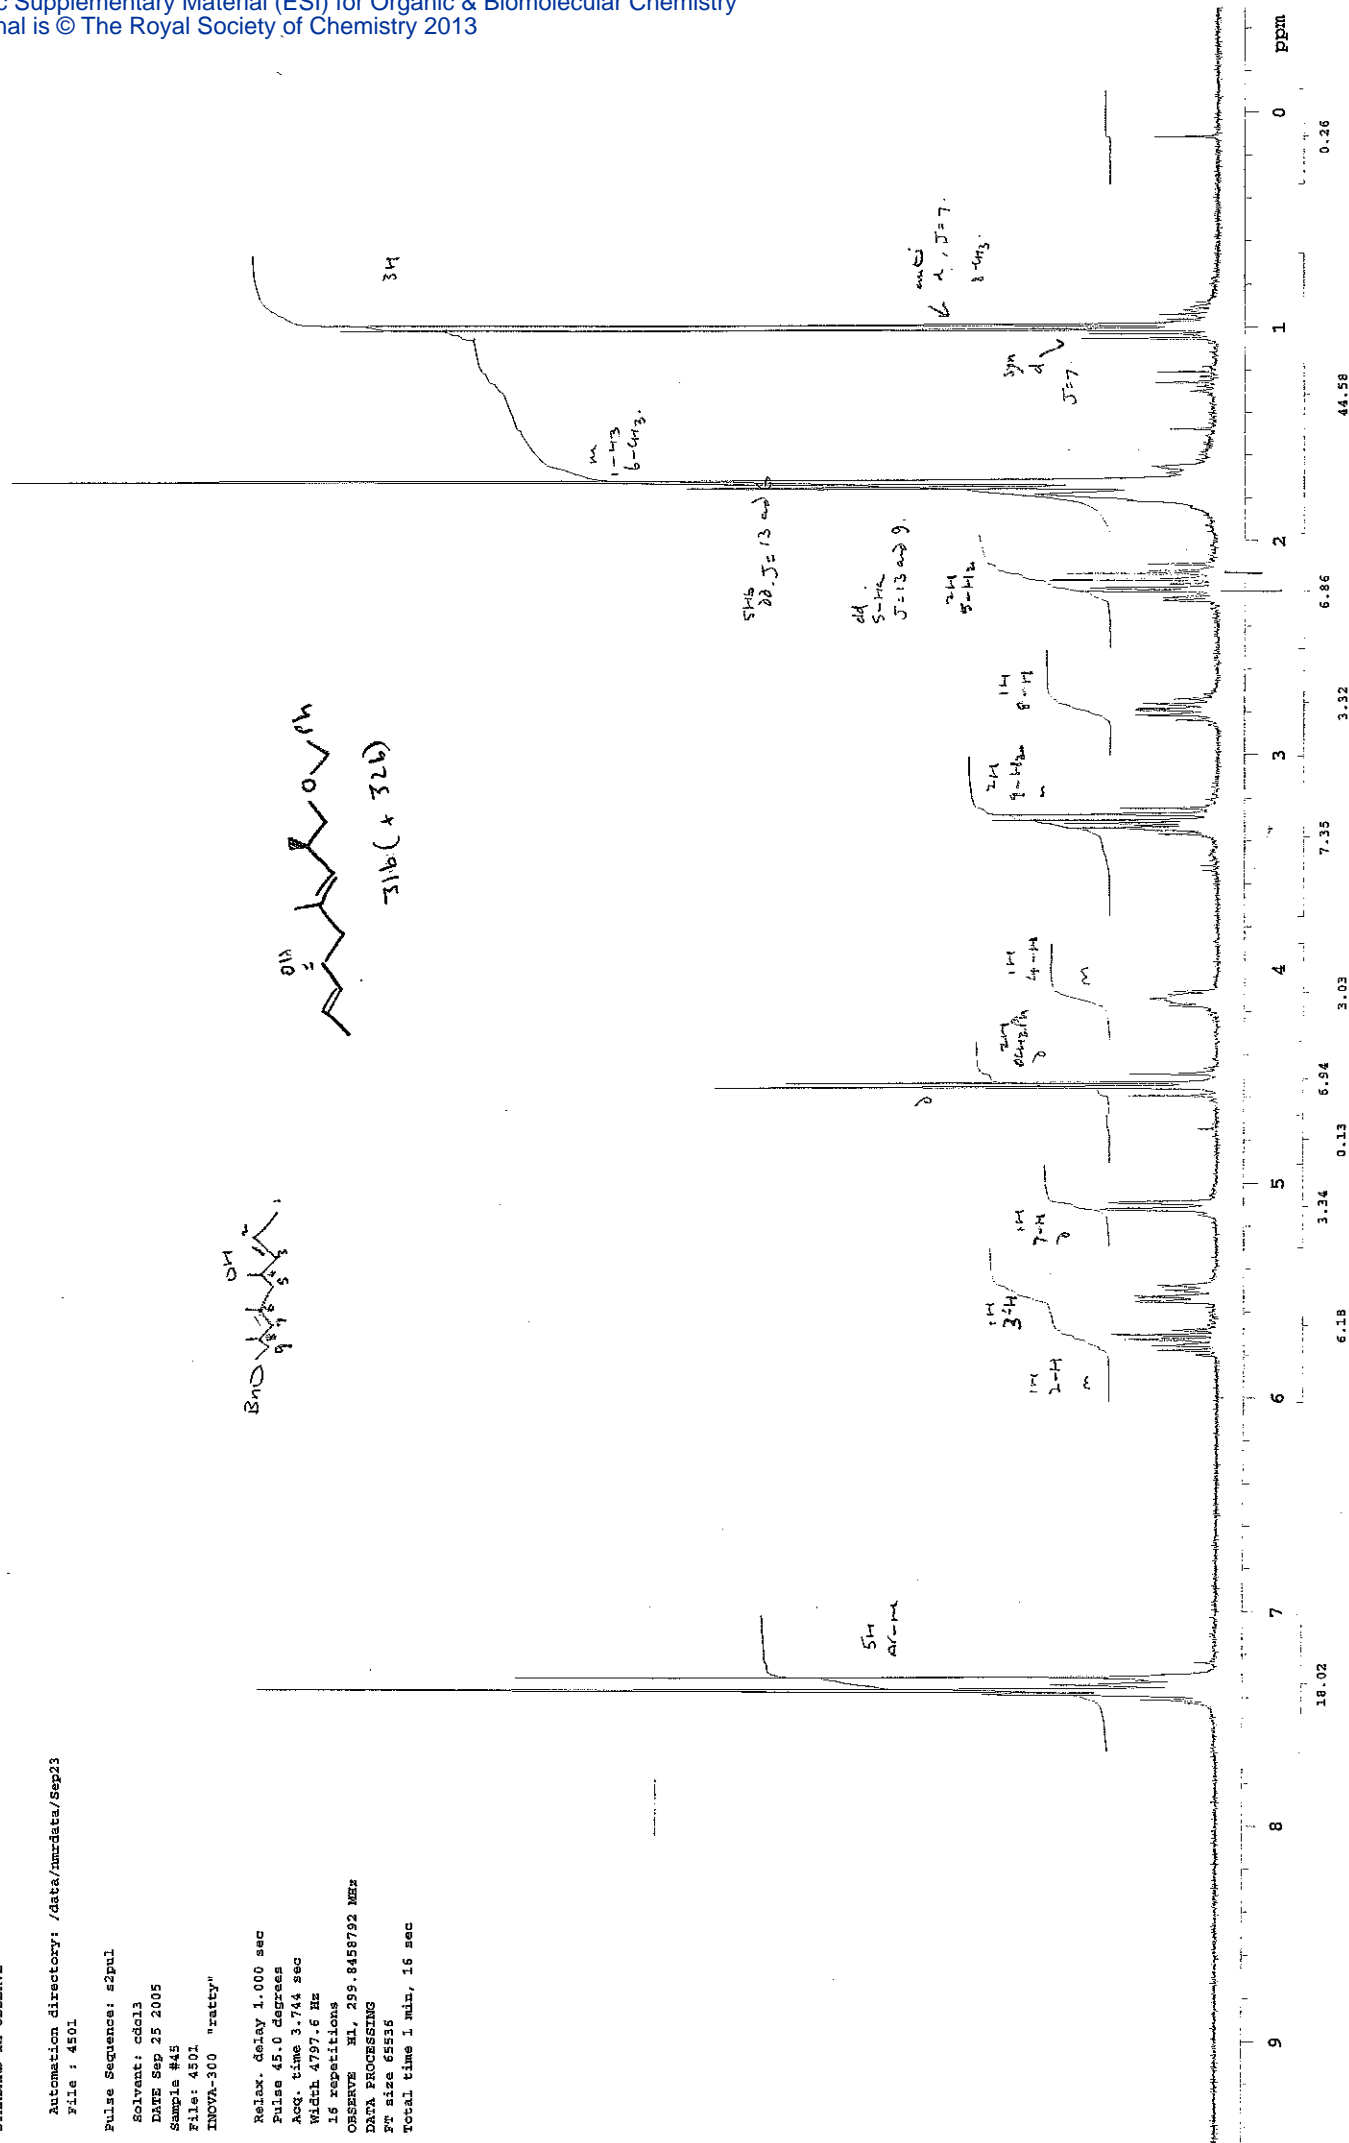



nb008  
13C OBSERVE  
pad=2 run with kindr0 before acquisition  
Automation directory: /data/nmrdata/Sep27  
File : 1801  
Pulse Sequence: s2pul  
Solvent: cdcl3  
Date Sep 27 2005  
Sample #18  
File: 1801  
INOVA-300 "ratty"  
Relax. delay 1.000 sec  
Pulse 45.0 degrees  
Acq. time 1.815 sec  
Width 18850.1 Hz  
256 repetitions  
OBSERVE C13, 75.3562883 MHz  
DECOUPLE H1, 259.8473786 MHz  
Power 37 dB  
continuously on  
WALTZ-16 modulated  
DATA PROCESSING  
Line broadening 1.0 Hz  
FT size 131072  
Total time 12 min, 2 sec

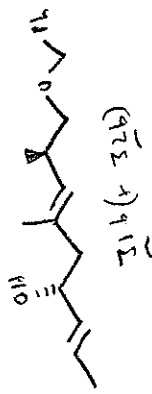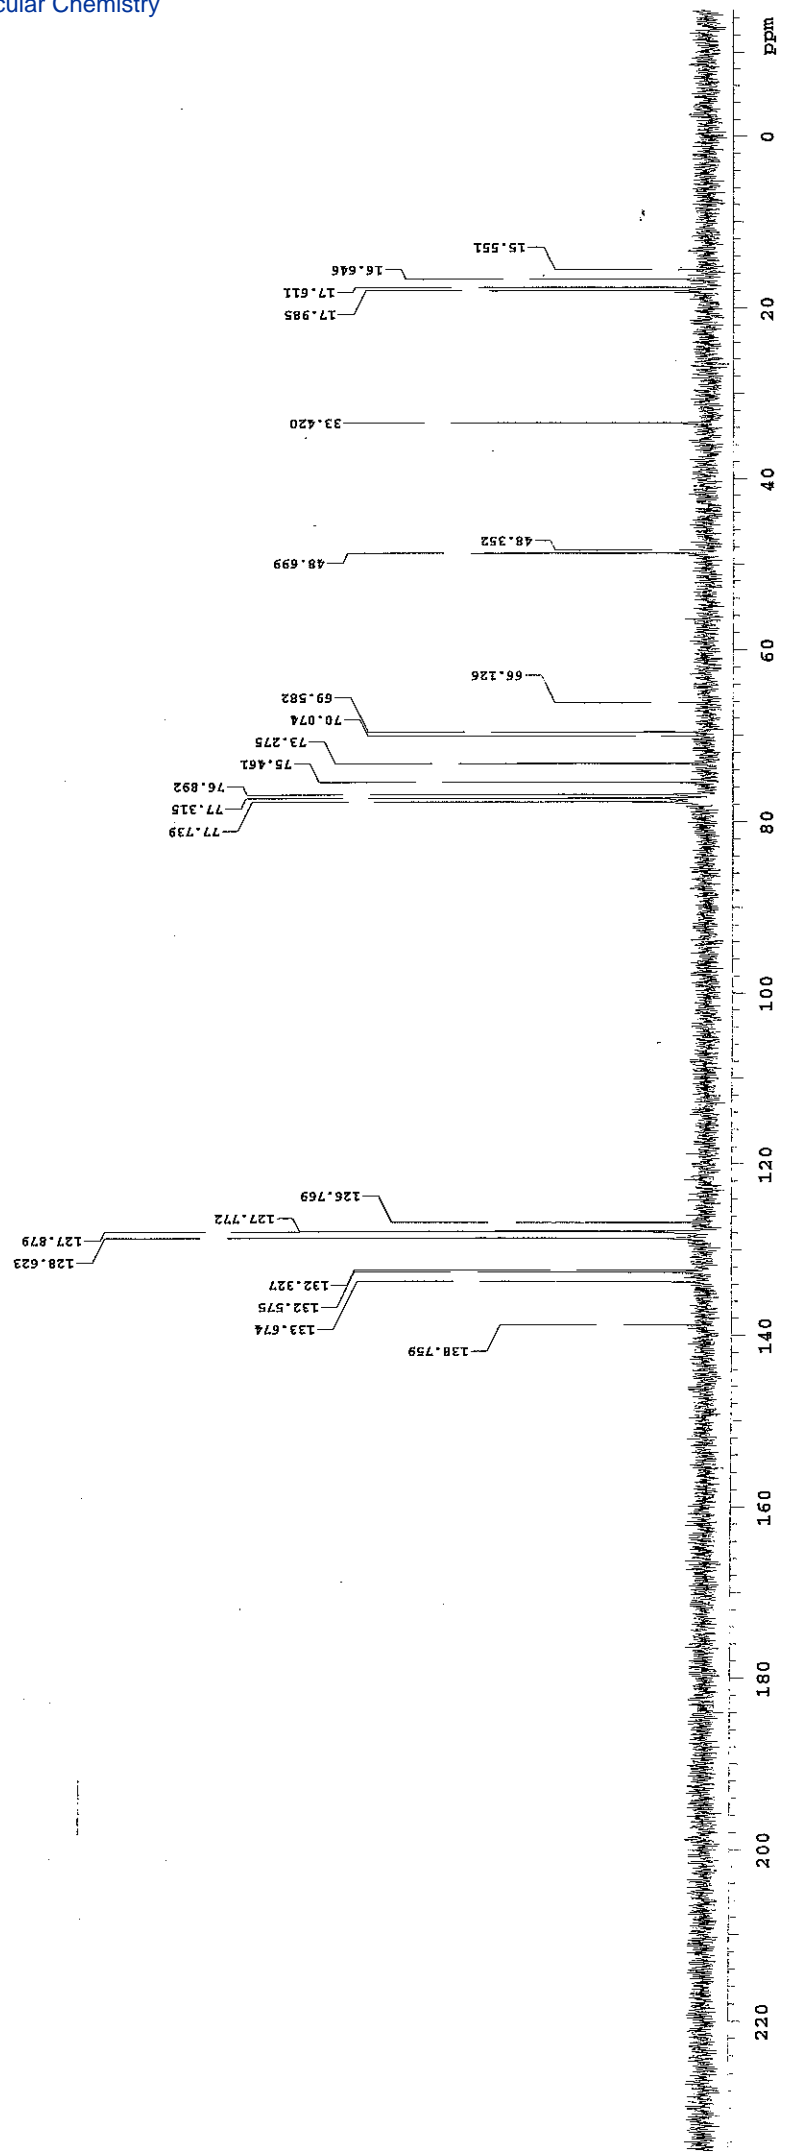

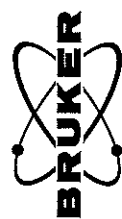

nb090  
mPROTON CDCl<sub>3</sub> /opt/topspin ejt 41

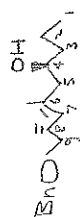

3.1 d (+ 32 d)

Current Data Parameters  
NAME 2007-06-08-ejt-41  
EXPNO 10  
PROCNO 1  
F2 - Acquisition Parameters  
Date\_ 20070608  
Time 14.49  
INSTRUM spect  
PROBHD 5 mm TXI 1H/D-  
PULPROG zg30b  
TD 65536  
SOLVENT CDCl<sub>3</sub>  
NS 16  
DS 0  
SWH 10330.578 Hz  
FIDRES 0.157632 Hz  
AQ 3.1719923 sec  
RG 36  
DW 48.400 usec  
DE 13.76 usec  
TE 300.0 K  
D1 1.00000000 sec  
TD0 1  
===== CHANNEL f1 =====  
NUC1 1H  
P1 7.80 usec  
PL1 3.25 dB  
SFO1 500.1330885 MHz  
F2 - Processing parameters  
SI 32768  
SF 500.1300471 MHz  
WDW EM  
SSB 0  
LB 0.30 Hz  
GB 0  
PC 1.00

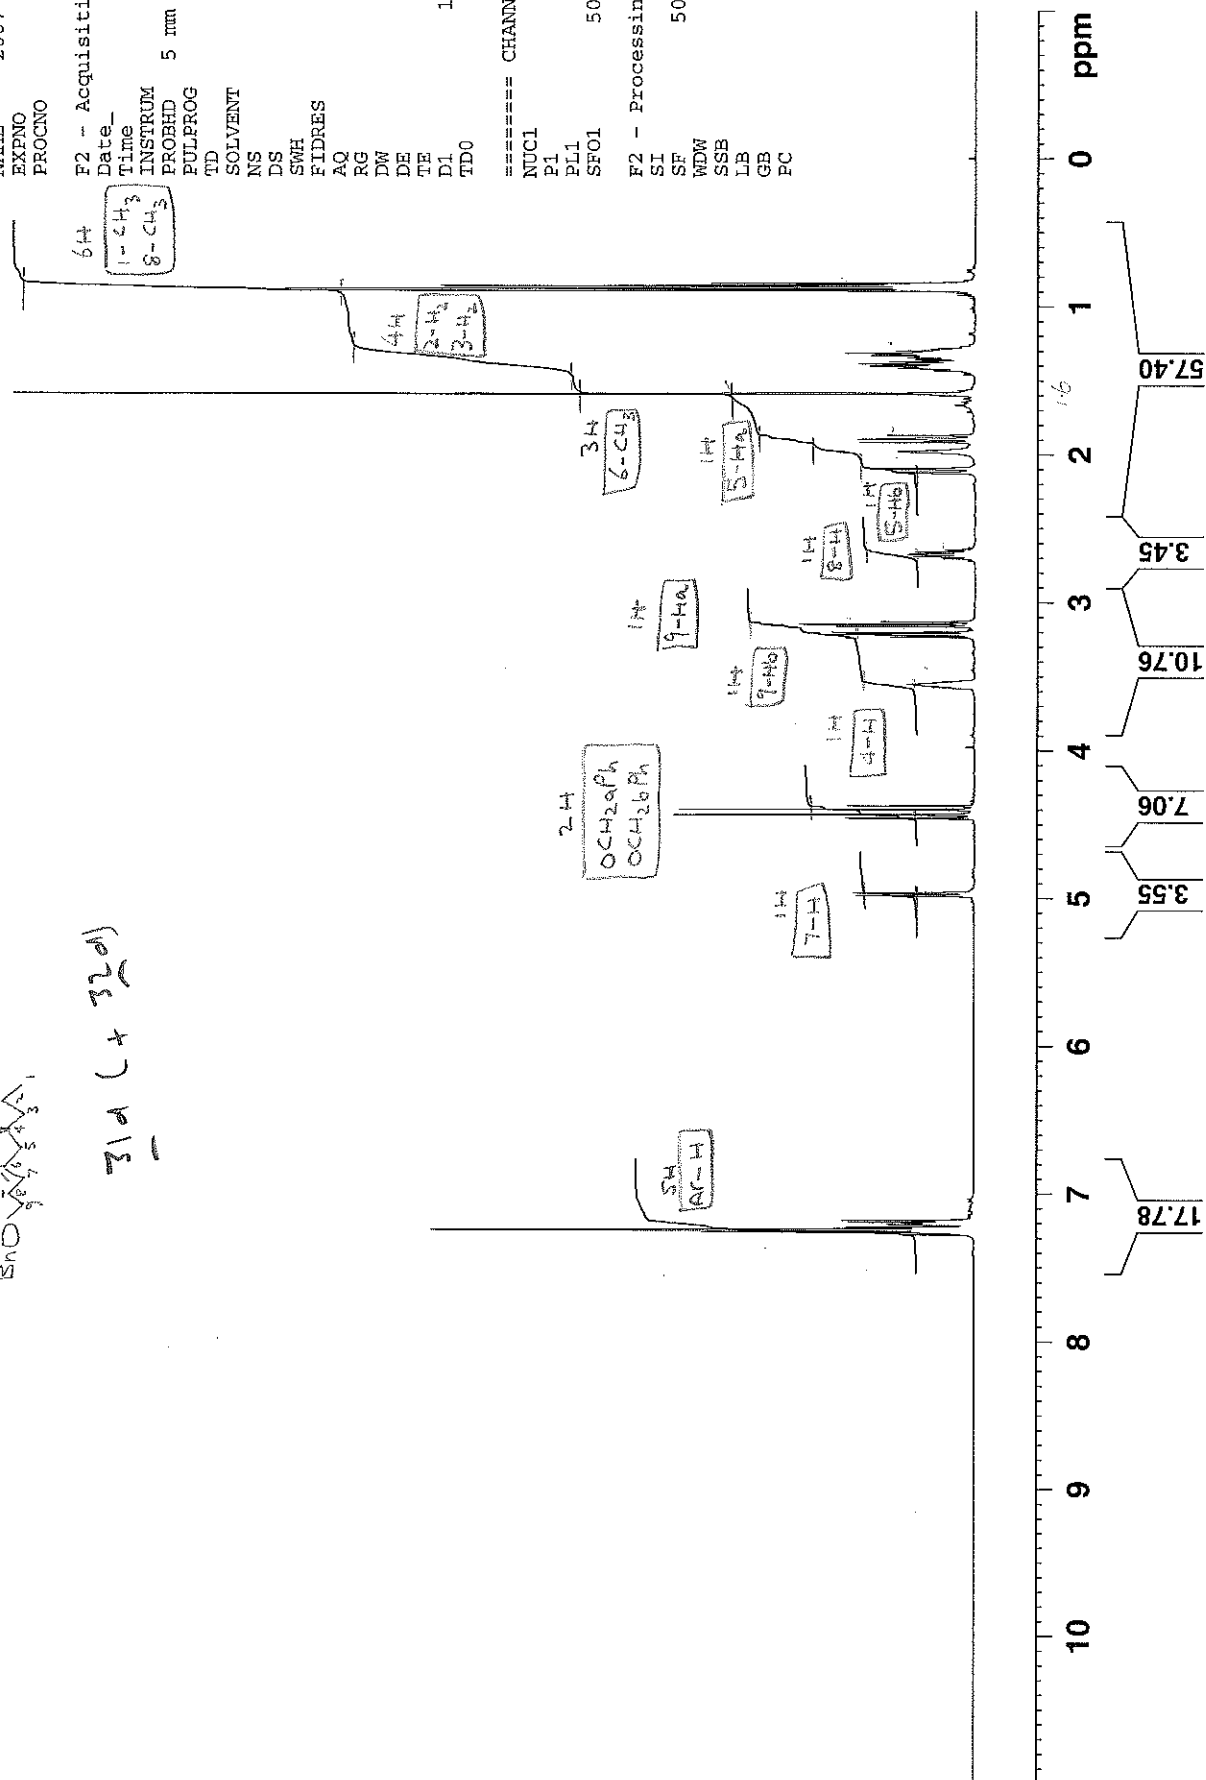

C<sub>18</sub>H<sub>28</sub>O<sub>2</sub>  
FW = 276.21

nb090

mCARBON CDCl<sub>3</sub> /opt/topspin ejt 38

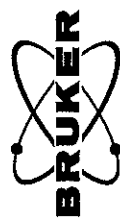

138.49  
132.64  
131.94  
128.35  
127.60  
127.50

77.31  
77.05  
76.80  
75.24  
73.00  
67.67

48.23  
39.11  
33.14

19.02  
17.34  
16.39  
14.19

Current Data Parameters  
NAME 2007-06-11-ejt-38  
EXPNO 10  
PROCNO 1

F2 - Acquisition Parameters  
Date\_ 20070611  
Time 12.35  
INSTRUM spect  
PROBHD 5 mm TXI 1H/D-  
PULPROG zgpg30  
TD 65536  
SOLVENT CDCl<sub>3</sub>  
NS 256  
DS 2  
SMH 29761.904 Hz  
FIDRES 0.454131 Hz  
AQ 1.1010548 sec  
RG 512  
DW 16.800 usec  
DE 6.00 usec  
TE 300.0 K  
D1 2.00000000 sec  
d11 0.03000000 sec  
DELTA 1.89999998 sec  
TD0 1

===== CHANNEL f1 =====  
NUC1 13C  
P1 11.50 usec  
PL1 -4.20 dB  
SFO1 125.7703643 MHz

===== CHANNEL f2 =====  
CPDPRG2 waltz16  
NUC2 1H  
PCPD2 80.00 usec  
PL12 23.47 dB  
PL13 120.00 dB  
PL2 3.25 dB  
SFO2 500.1320005 MHz

F2 - Processing parameters  
SI 32768  
SF 125.7577890 MHz  
WDW EM  
SSB 0  
LB 1.00 Hz  
GB 0  
PC 1.40

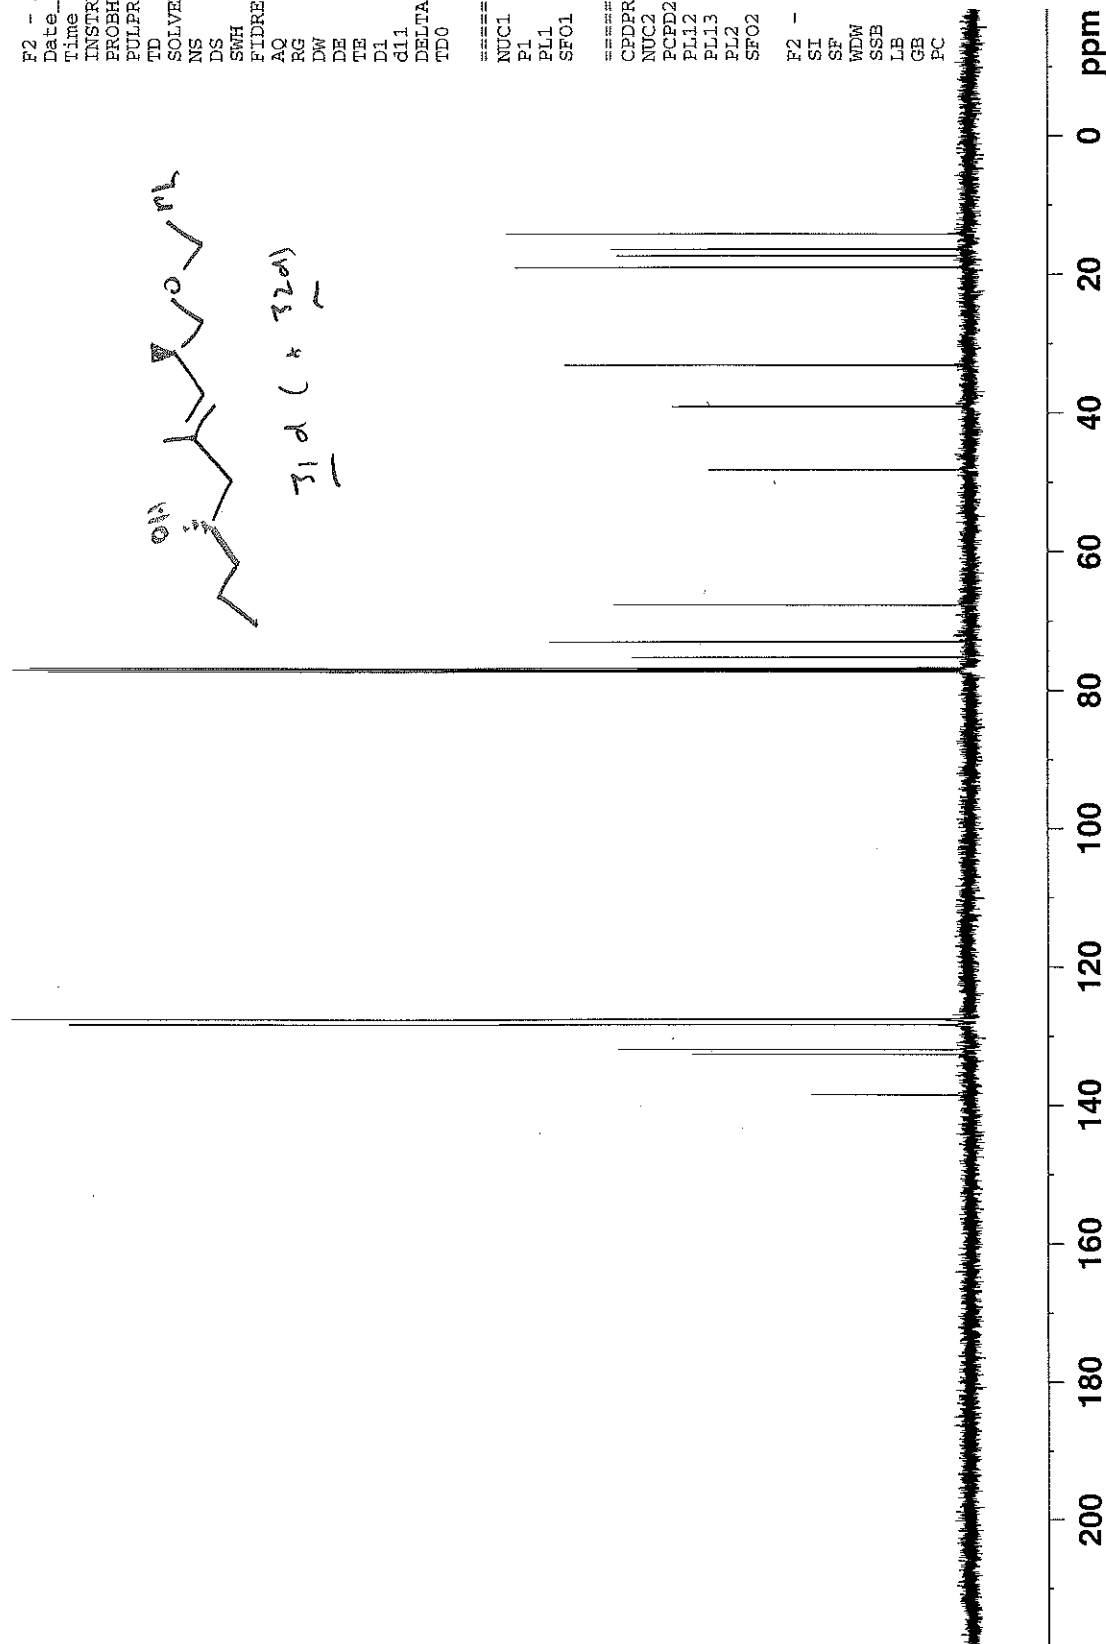

C<sub>18</sub> H<sub>36</sub> O<sub>2</sub>

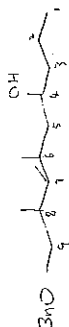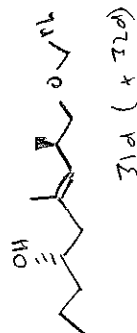

nb007  
STANDARD 1H OBSERVE

Automation directory: /data/nmrdata/Sep22  
File : 1901

Pulse Sequence: s2pul  
Solvent: cdcl3  
DATE Sep 22 2005  
Sample #19  
File: 1901  
INOVA-300 "fatty"

Relax. delay 1.000 sec  
Pulse 45.0 degrees  
Acq. time 3.744 sec  
Width 4797.6 Hz  
16 repetitions  
OBSERVE EI, 299.8458792 MHz  
DATA PROCESSING  
Ft size 65536  
Total time 1 min, 16 sec

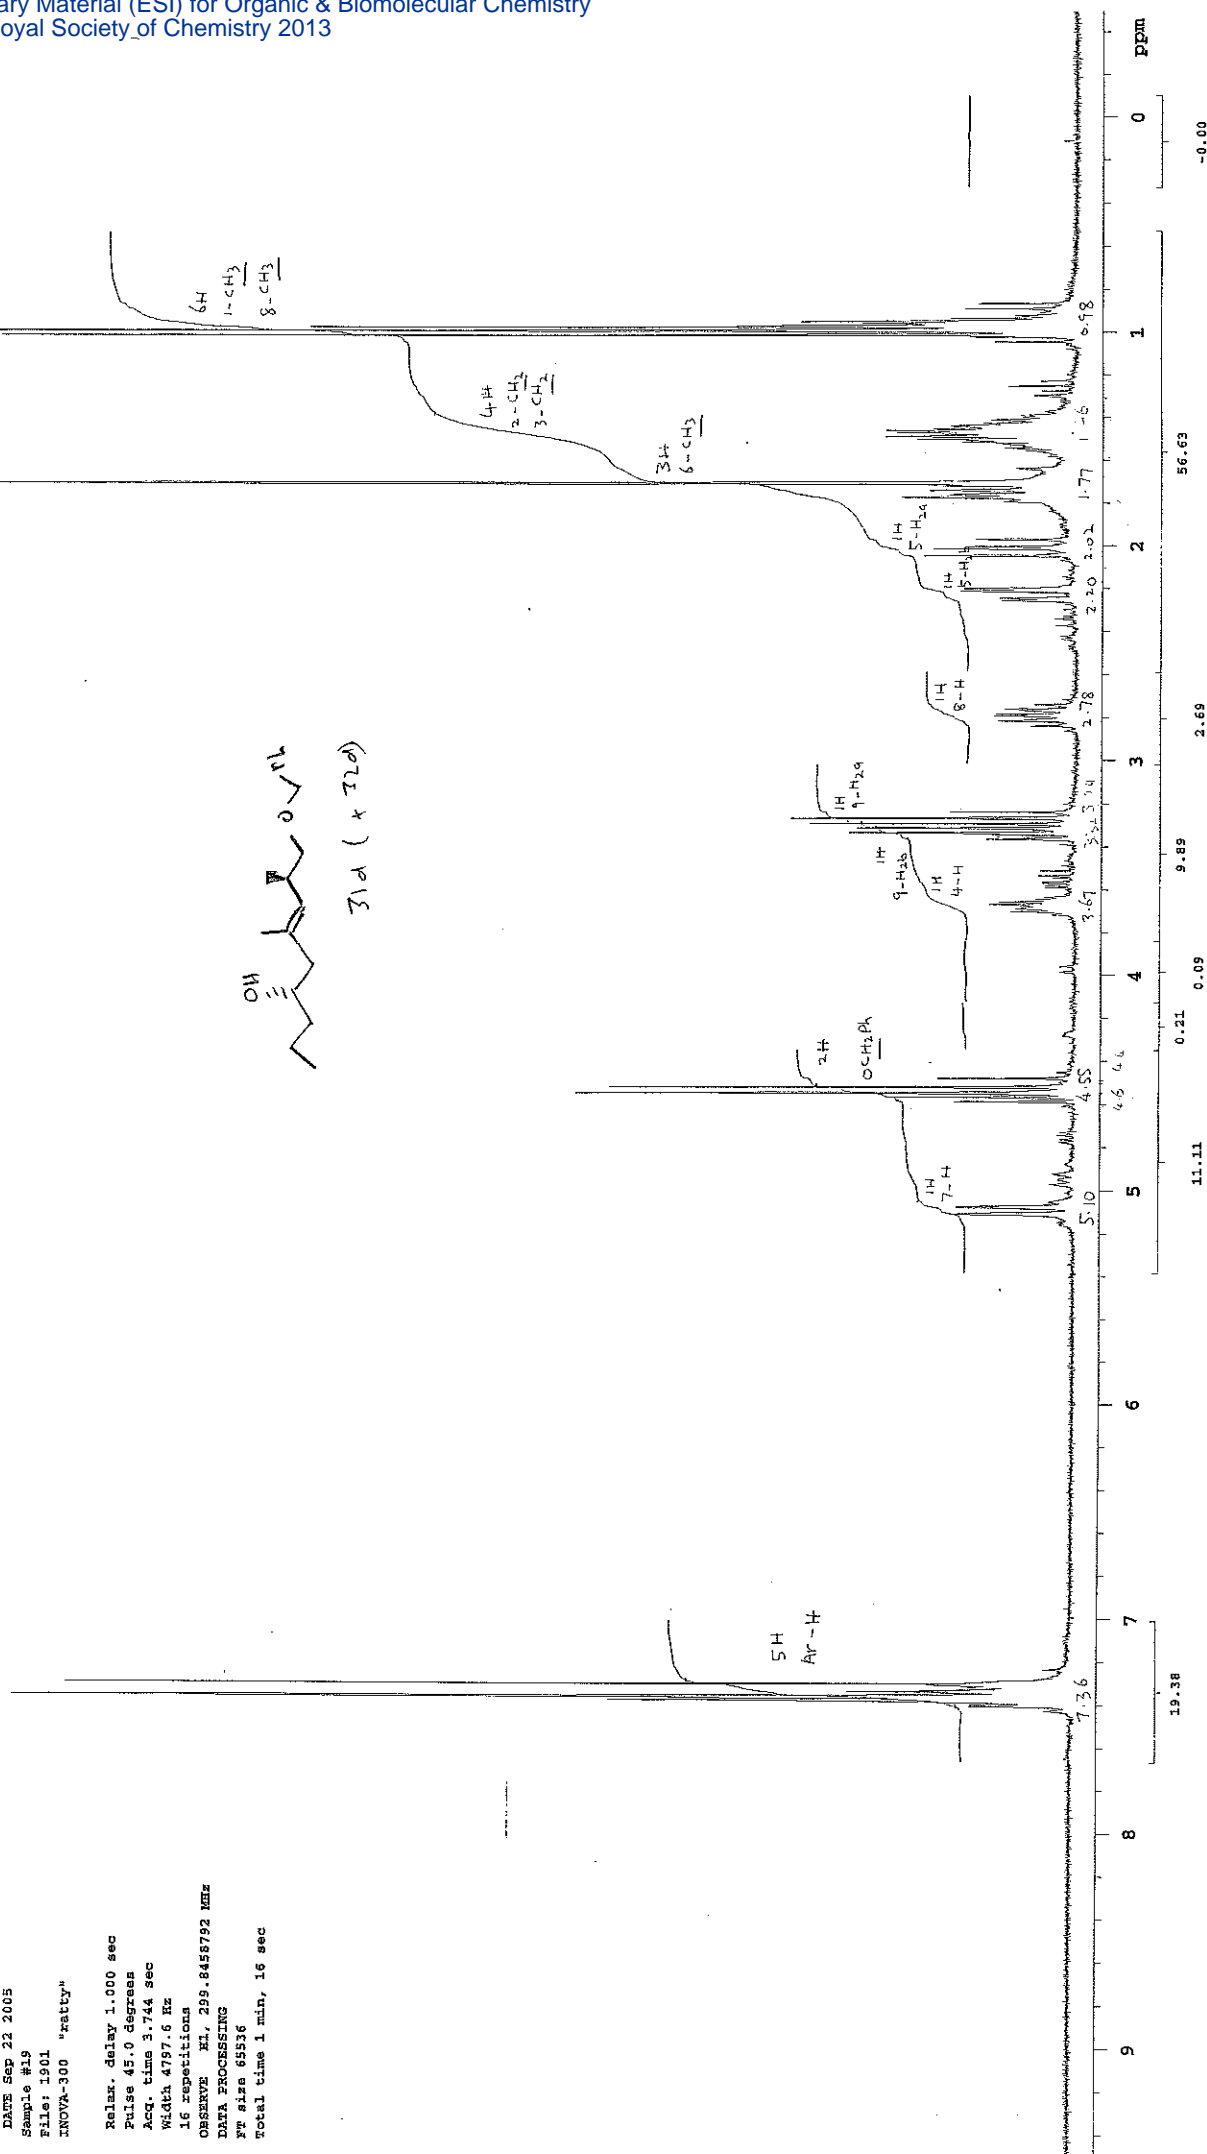

nb007  
STANDARD 1H OBSERVE2

Automation directory: /data/nmrdata/Sep22  
File : 1902

Pulse Sequence: s2pul  
Solvent: cdcl3  
DATE Sep 22 2005  
Sample #19  
File: 1902  
INOVA-300 "ratty"

Relax. delay 1.000 sec  
Pulse 45.0 degrees  
Acq. time 1.815 sec  
Width 18850.1 Hz  
256 repetitions  
OBSERVE CH3, 75.3962883 MHz  
DECOUPLE H1, 299.8473786 MHz  
Power 37 dB  
continuously on  
WALTZ-16 modulated  
DATA PROCESSING  
Line broadening 1.0 Hz  
FT size 131072  
Total time 12 min, 2 sec

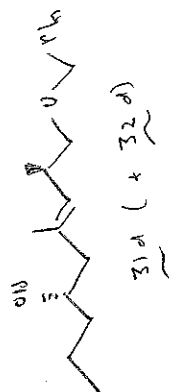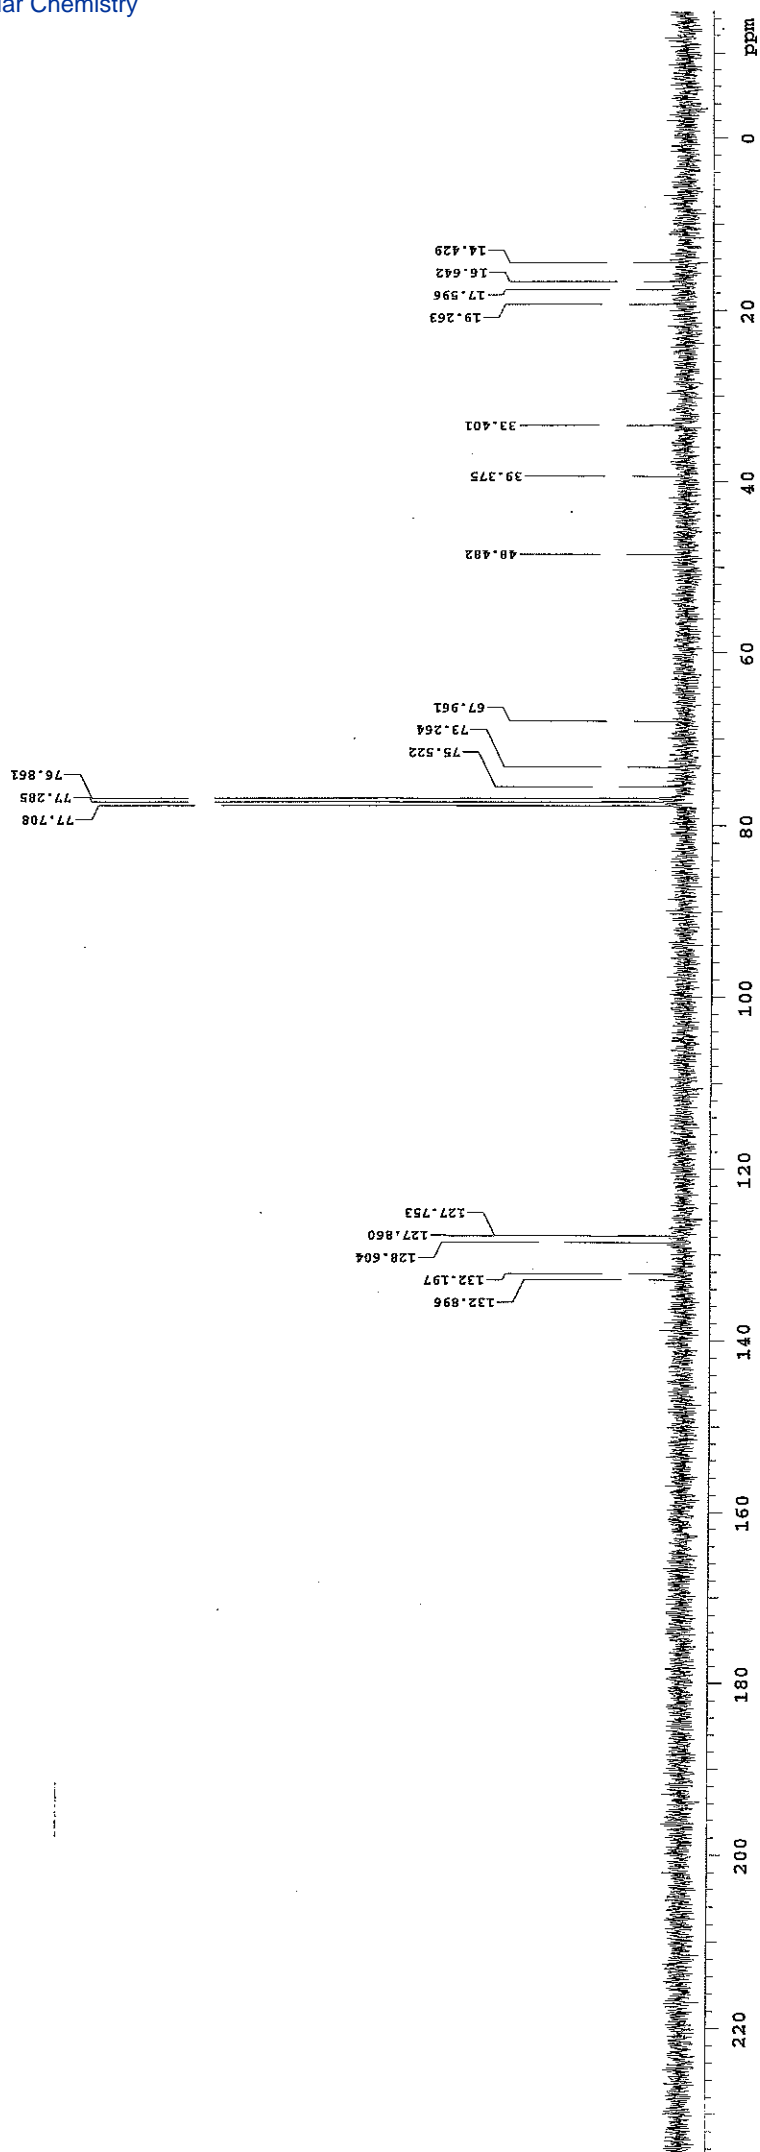

h2009L  
STANDARD 1H OBSERVE

Automation directory: /data/wwrdata/Jan13  
File : 1601

Pulse Sequence: s2pul  
Solvent: cdcl3  
DATE Jan 13 2006  
Sample #16  
File: 1601  
INOVA-300 "var300b"

Relax. delay 1.000 sec  
Pulse 45.0 degrees  
Acq. time 3.744 sec  
Width 4797.6 Hz  
16 repetitions  
OBSERVE E1, 299.8458792 MHz  
DATA PROCESSING  
FT size 65536  
Total time 1 min, 16 sec

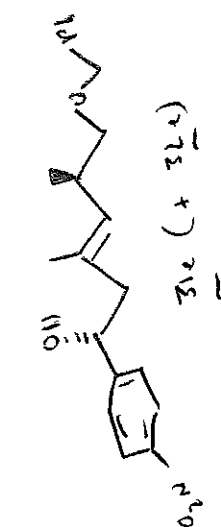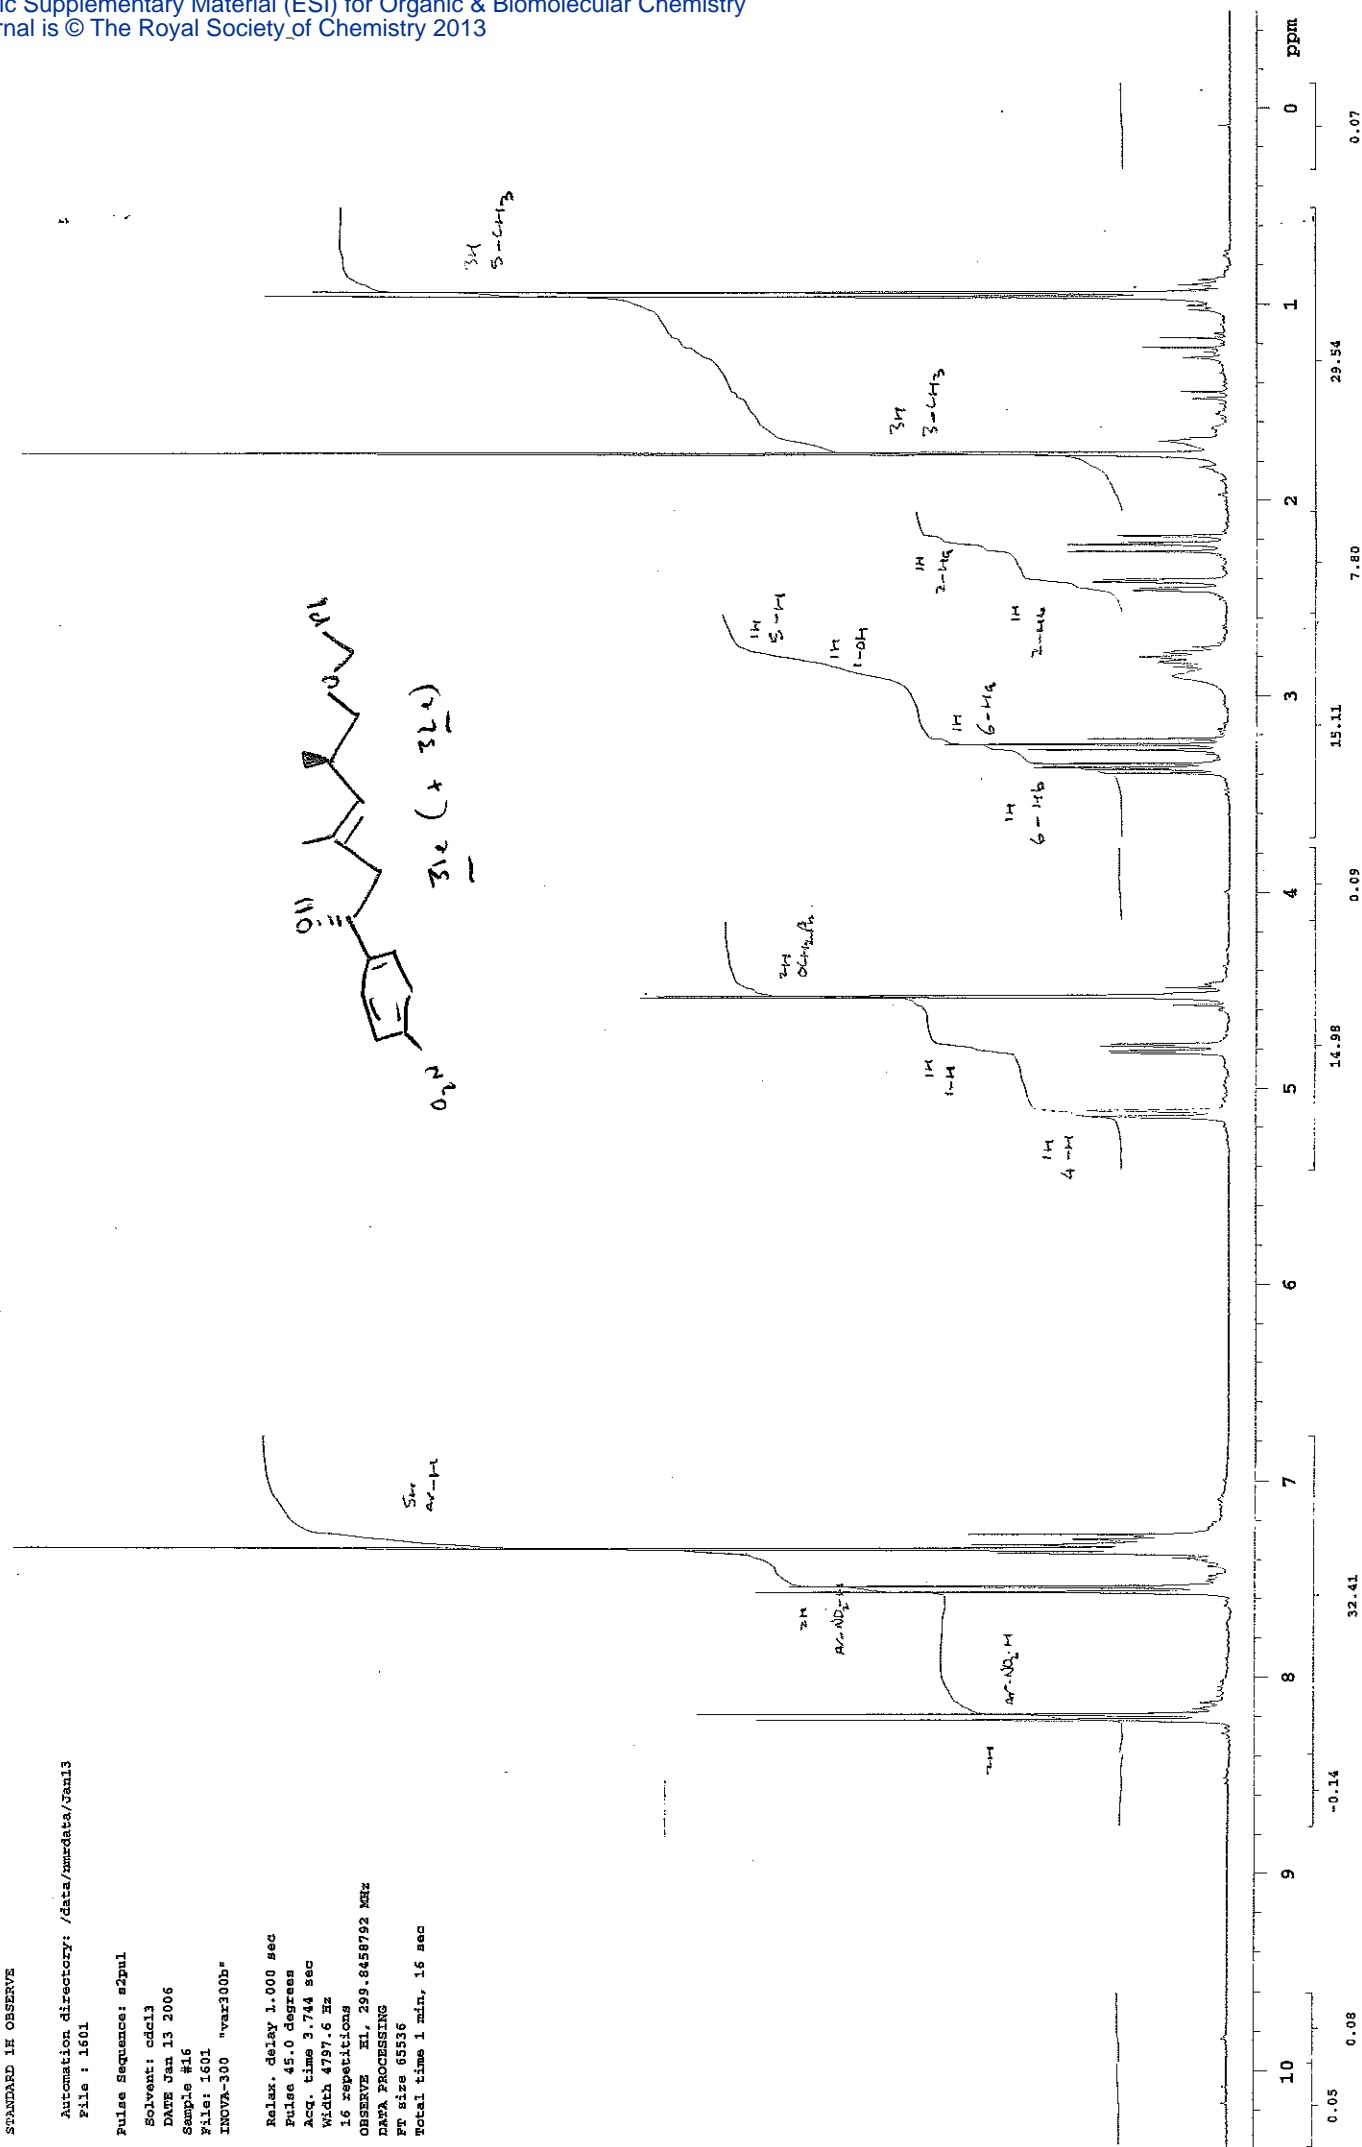

kb008r

13C OBSERVE

pad=2 run with fmdx0 before acquisition

Automation directory: /data/nmrdata/Jan13

File : 2101

Pulse Sequence: s2yn1

Solvent: cdcl3

DATE Jan 13 2006

Sample #21

File: 2101

INNOVA-300 "var300b"

Relax. delay 1.000 sec

Pulse 45.0 degrees

Acq. time 1.815 sec

Width 18850.1 Hz

256 repetitions

OBSERVE C13, 75.3962883 MHz

DECOUPLE H1, 299.6473786 MHz

Power 37 dB

continuously on

WALTZ-16 Modulated

DATA PROCESSING

Line broadening 1.0 Hz

PT size 131072

Total time 12 min, 2 sec

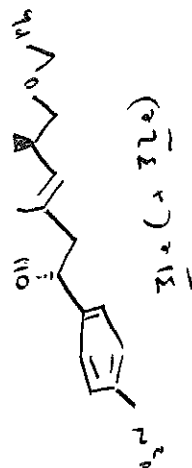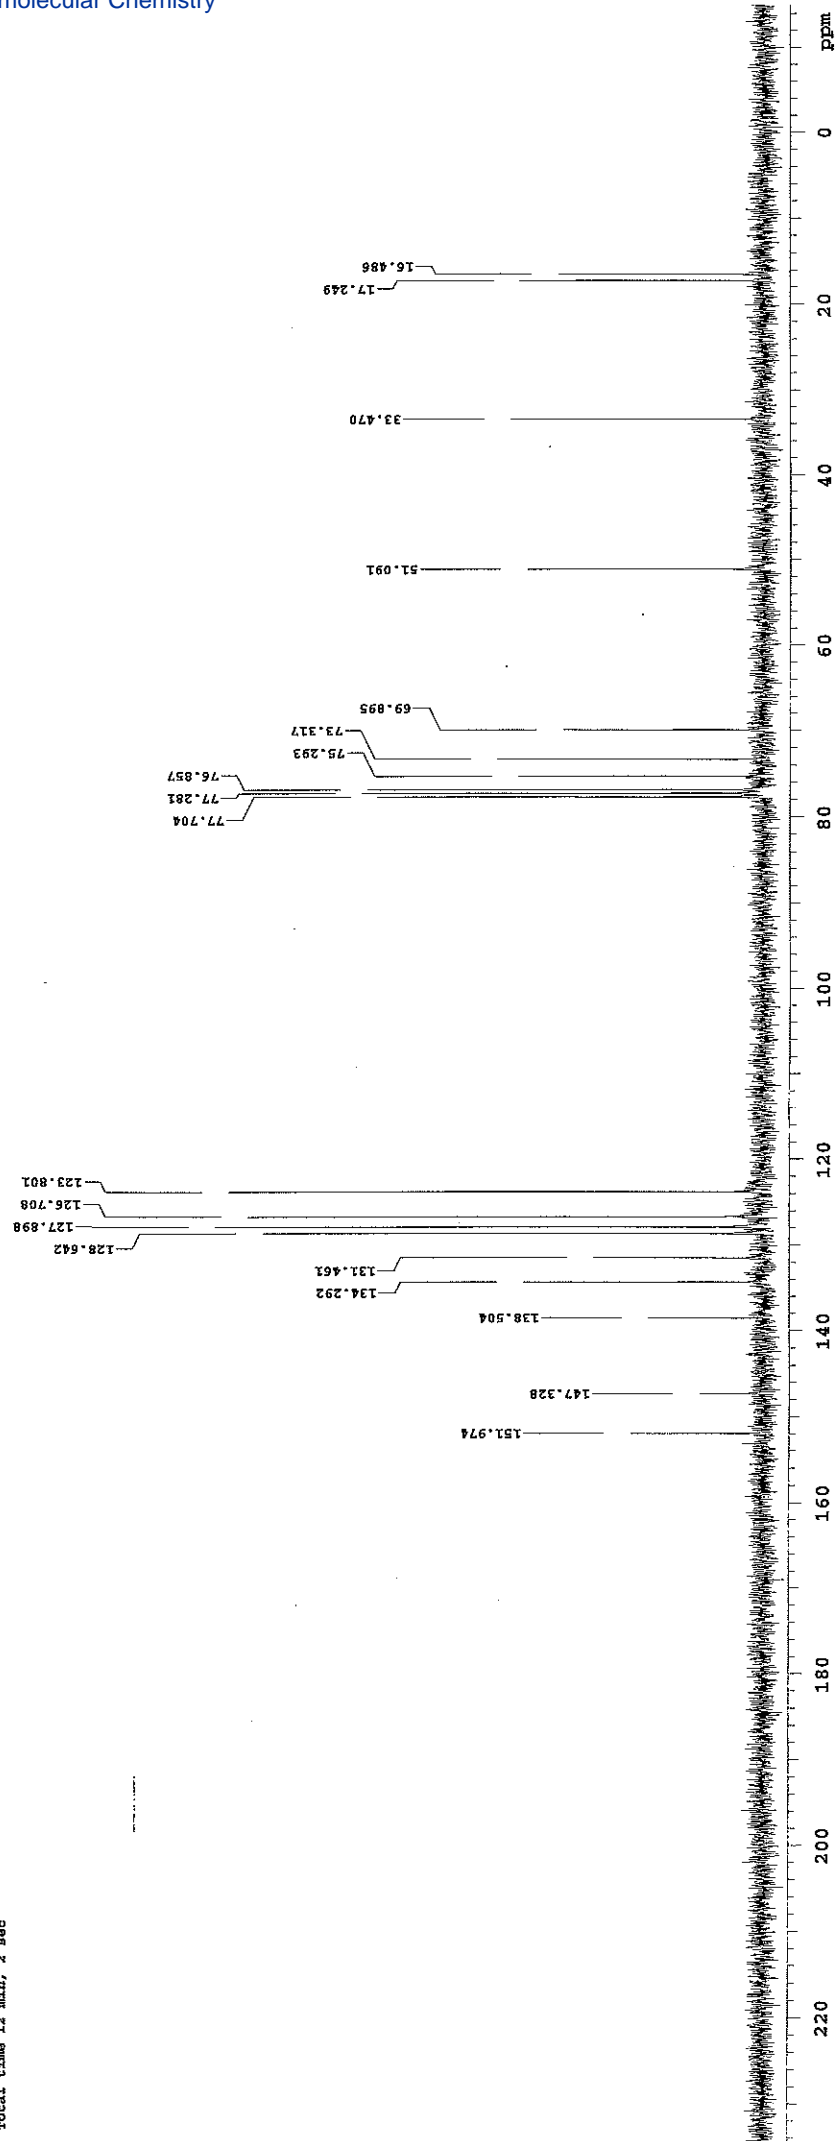

sd57  
STANDARD IN OBSERVE

Automation directory: /data/nmrdata/feb27  
File : 4102

Pulse Sequence: #2pul  
Solvent: cdcl3  
Ambient temperature  
Sample #41  
File: 4102  
XNOVA-300 "ratby"

Relax. delay 1.000 sec  
Pulse 45.0 degrees  
Acq. time 3.744 sec  
Width 4797.6 Hz  
16 repetitions  
OBSERVE H1, 299.8458792 MHz  
DATA PROCESSING  
Ft size 65536  
Total time 1 min, 16 sec

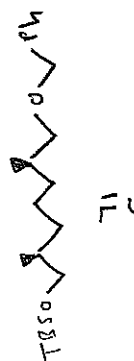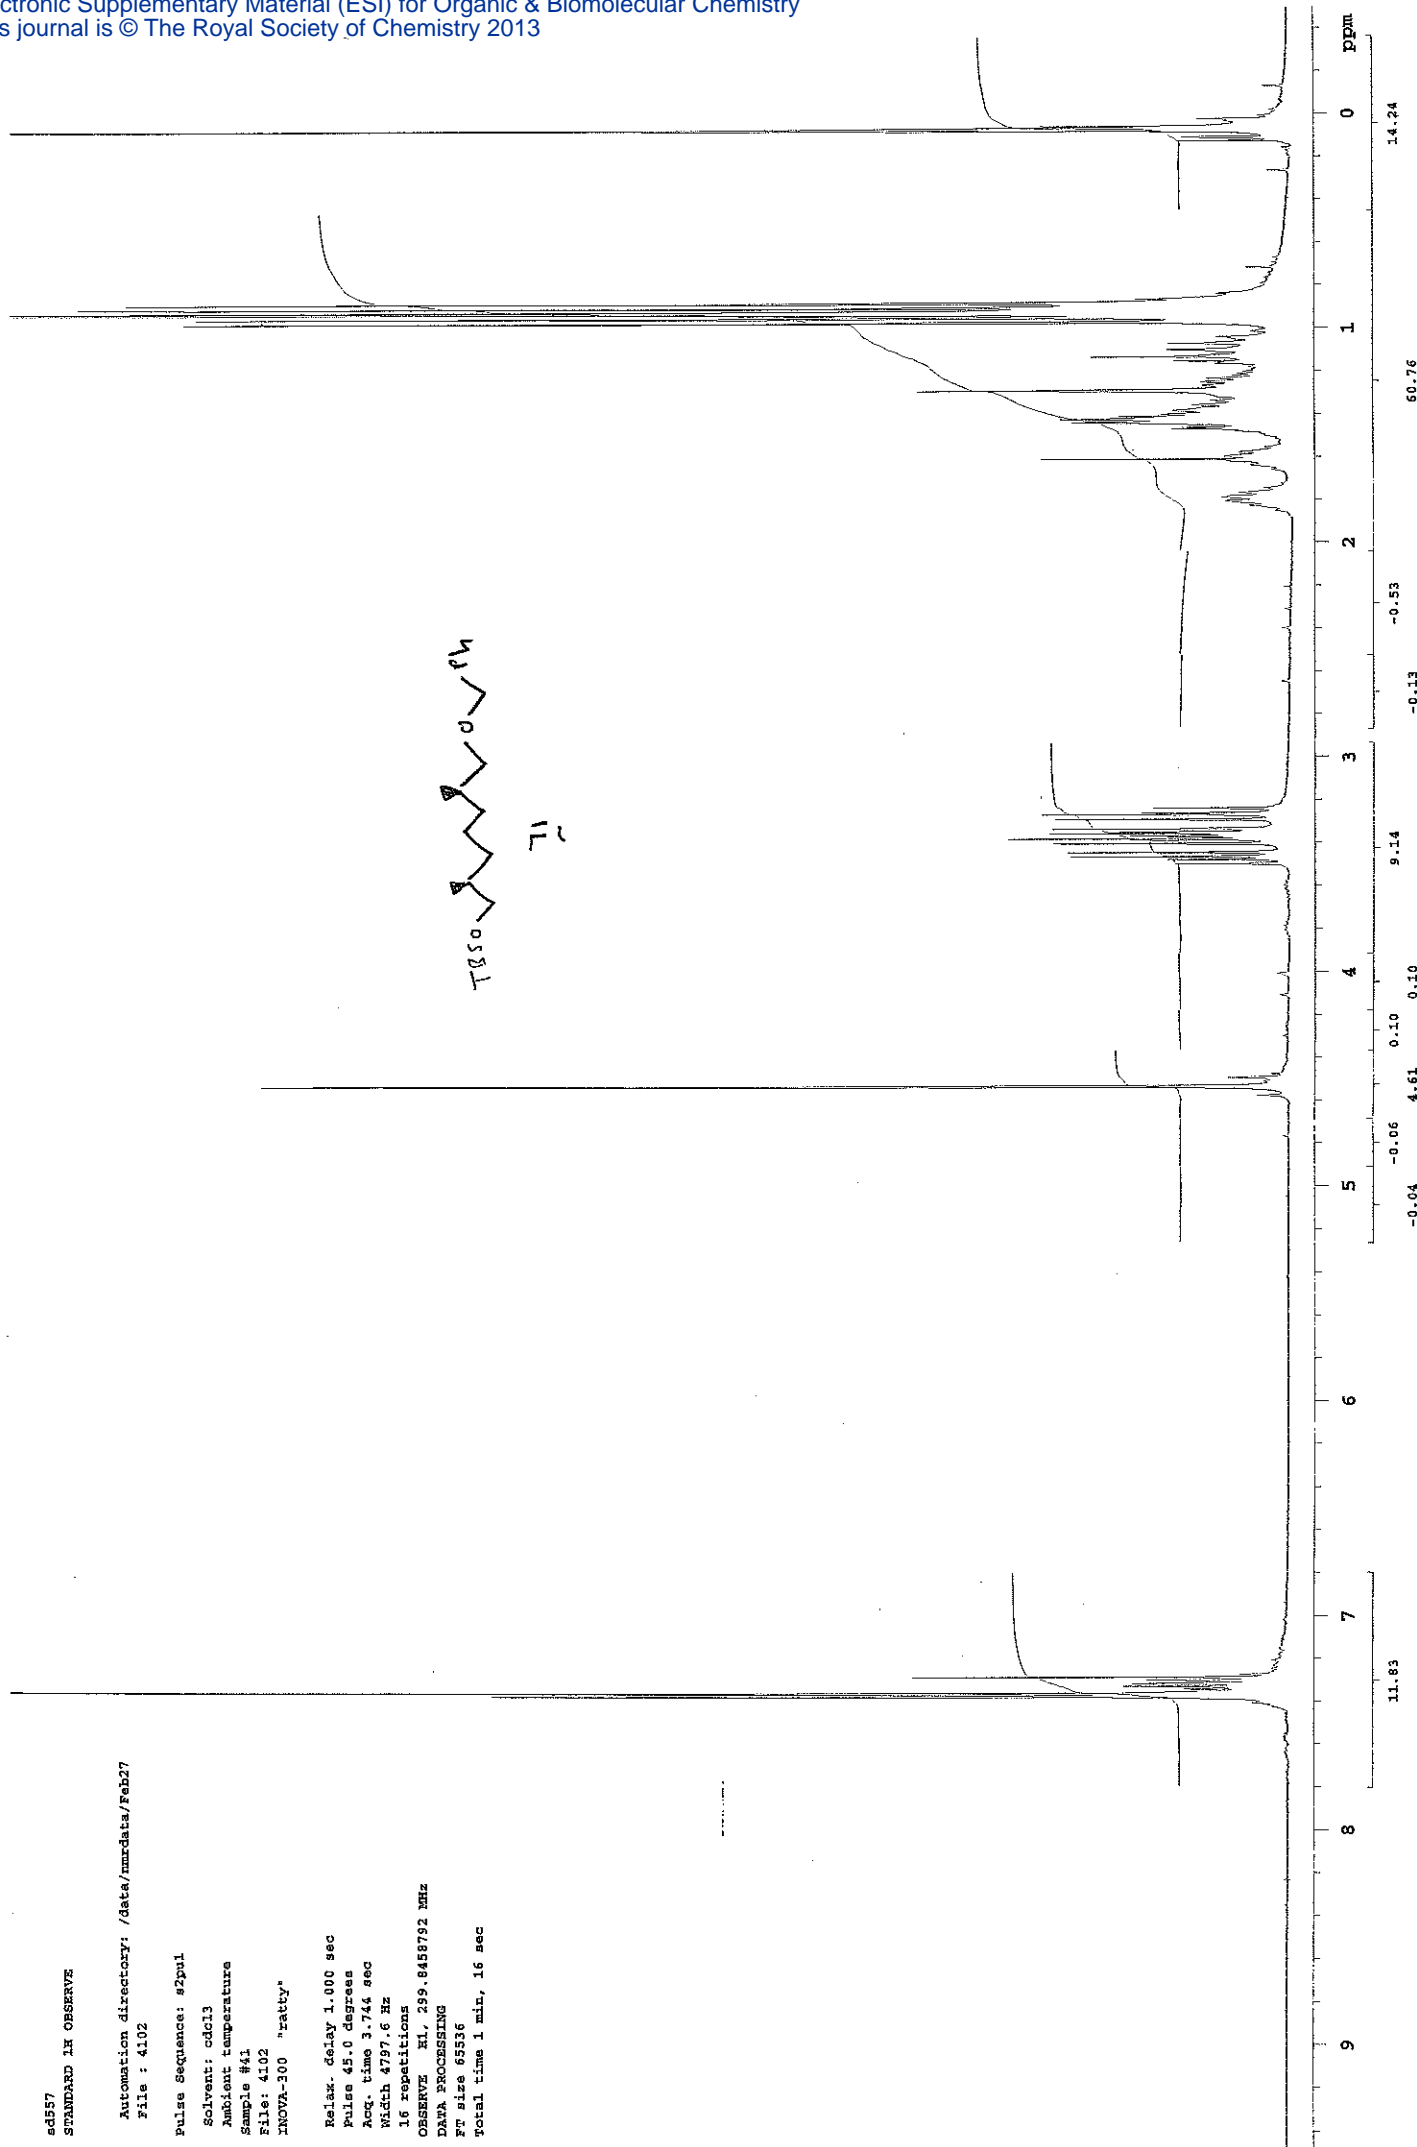



Expansions at 2.00 Hz/run

STANDARD 1H OBSERVE  
ED553

Automation directory: /data/nmrdata/feb25  
File : 0801

Pulse Sequence: s2pul  
Solvent: cdcl3  
Ambient temperature  
Sample #8  
File: 0801  
INOVA-300 "ratty"

Relax. delay 1.000 sec  
Pulse 45.0 degrees  
Acq. time 3.744 sec  
Width 4797.6 Hz  
16 repetitions  
OBSERVE H1, 299.8458792  
DATA PROCESSING  
FT size 65536  
Total time 1 min, 16 sec

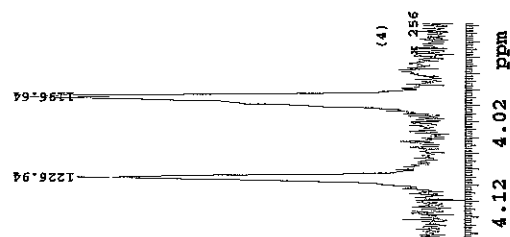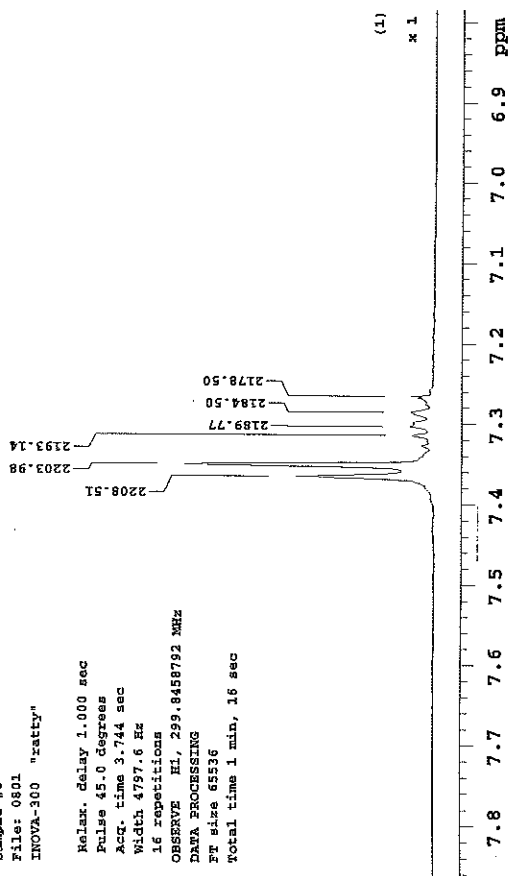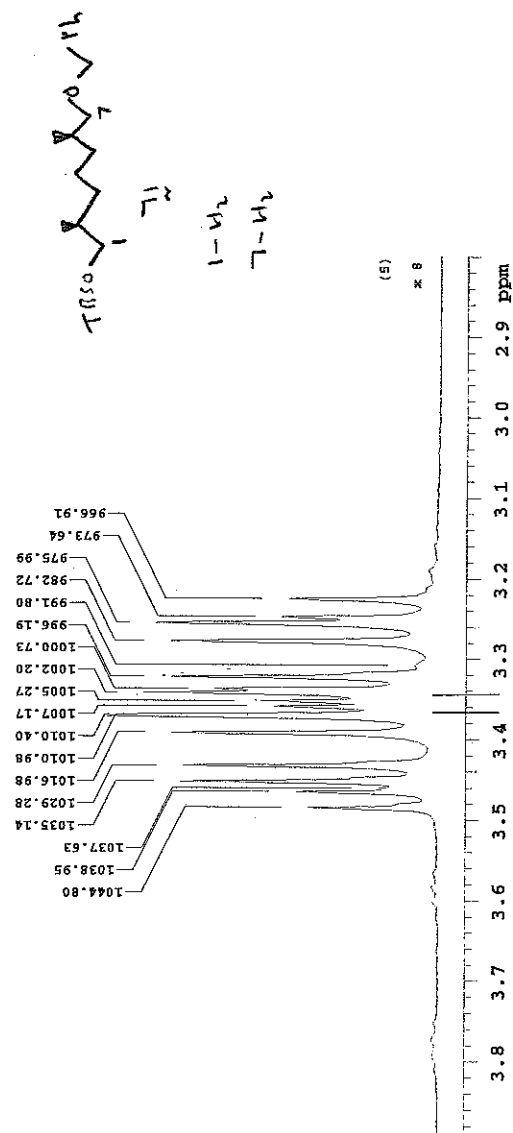

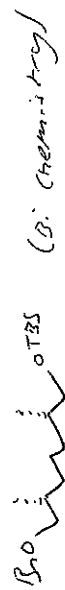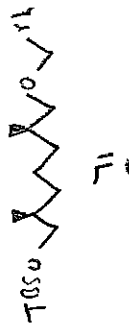

11

sd557  
13C OBSERVE  
pad-2 run with findz0 before acquisition  
Automation directory: /data/nmrdata/Mar26  
File : 0102  
Pulse Sequence: s2pul  
Solvent: cdcl3  
Ambient temperature  
Sample #1  
File: 0102  
INOVA-300 "ratby"  
Relax. delay 1.000 sec  
Pulse 45.0 degrees  
Acq. time 1.815 sec  
Width 1850.1 Hz  
256 repetitions  
OBSERVE C13, 75.3562883 MHz  
DECOUPLE H1, 299.8473786 MHz  
Power 37 dB  
continuously on  
WALTZ-16 modulated  
DATA PROCESSING  
Line broadening 1.0 Hz  
Ft size 131072  
Total time 12 min, 2 sec

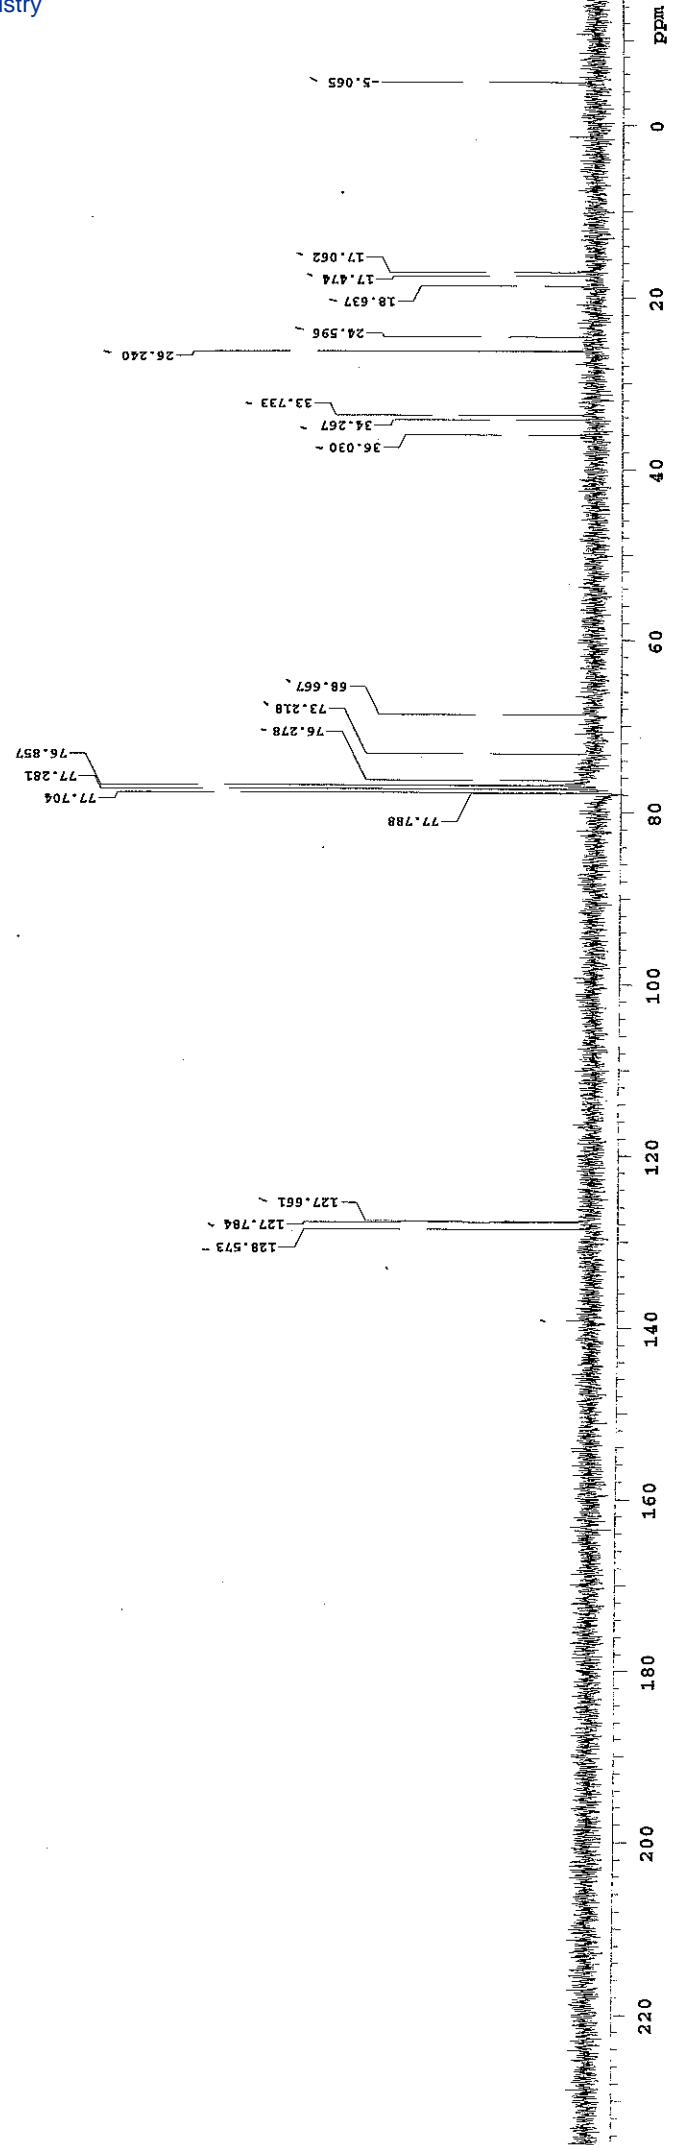

Automation directory: /data/mmrdata/Mar25

File : 4501

Pulse Sequence: s2pul

solvent: cdcl3

Ambient temperature

Sample #45

File: 4501

Relax. delay 1.000 sec

Pulse 45.0 degrees

Acq. time 3.744 sec

Width 4797.6 Hz

16 repetitions

OBSERVE H1, 299.8458792 MHz

## DATA PROCESSING

PT size 65535

Total time 1 min, 16 sec

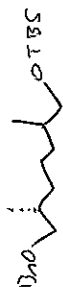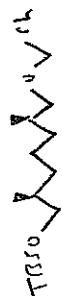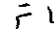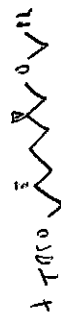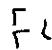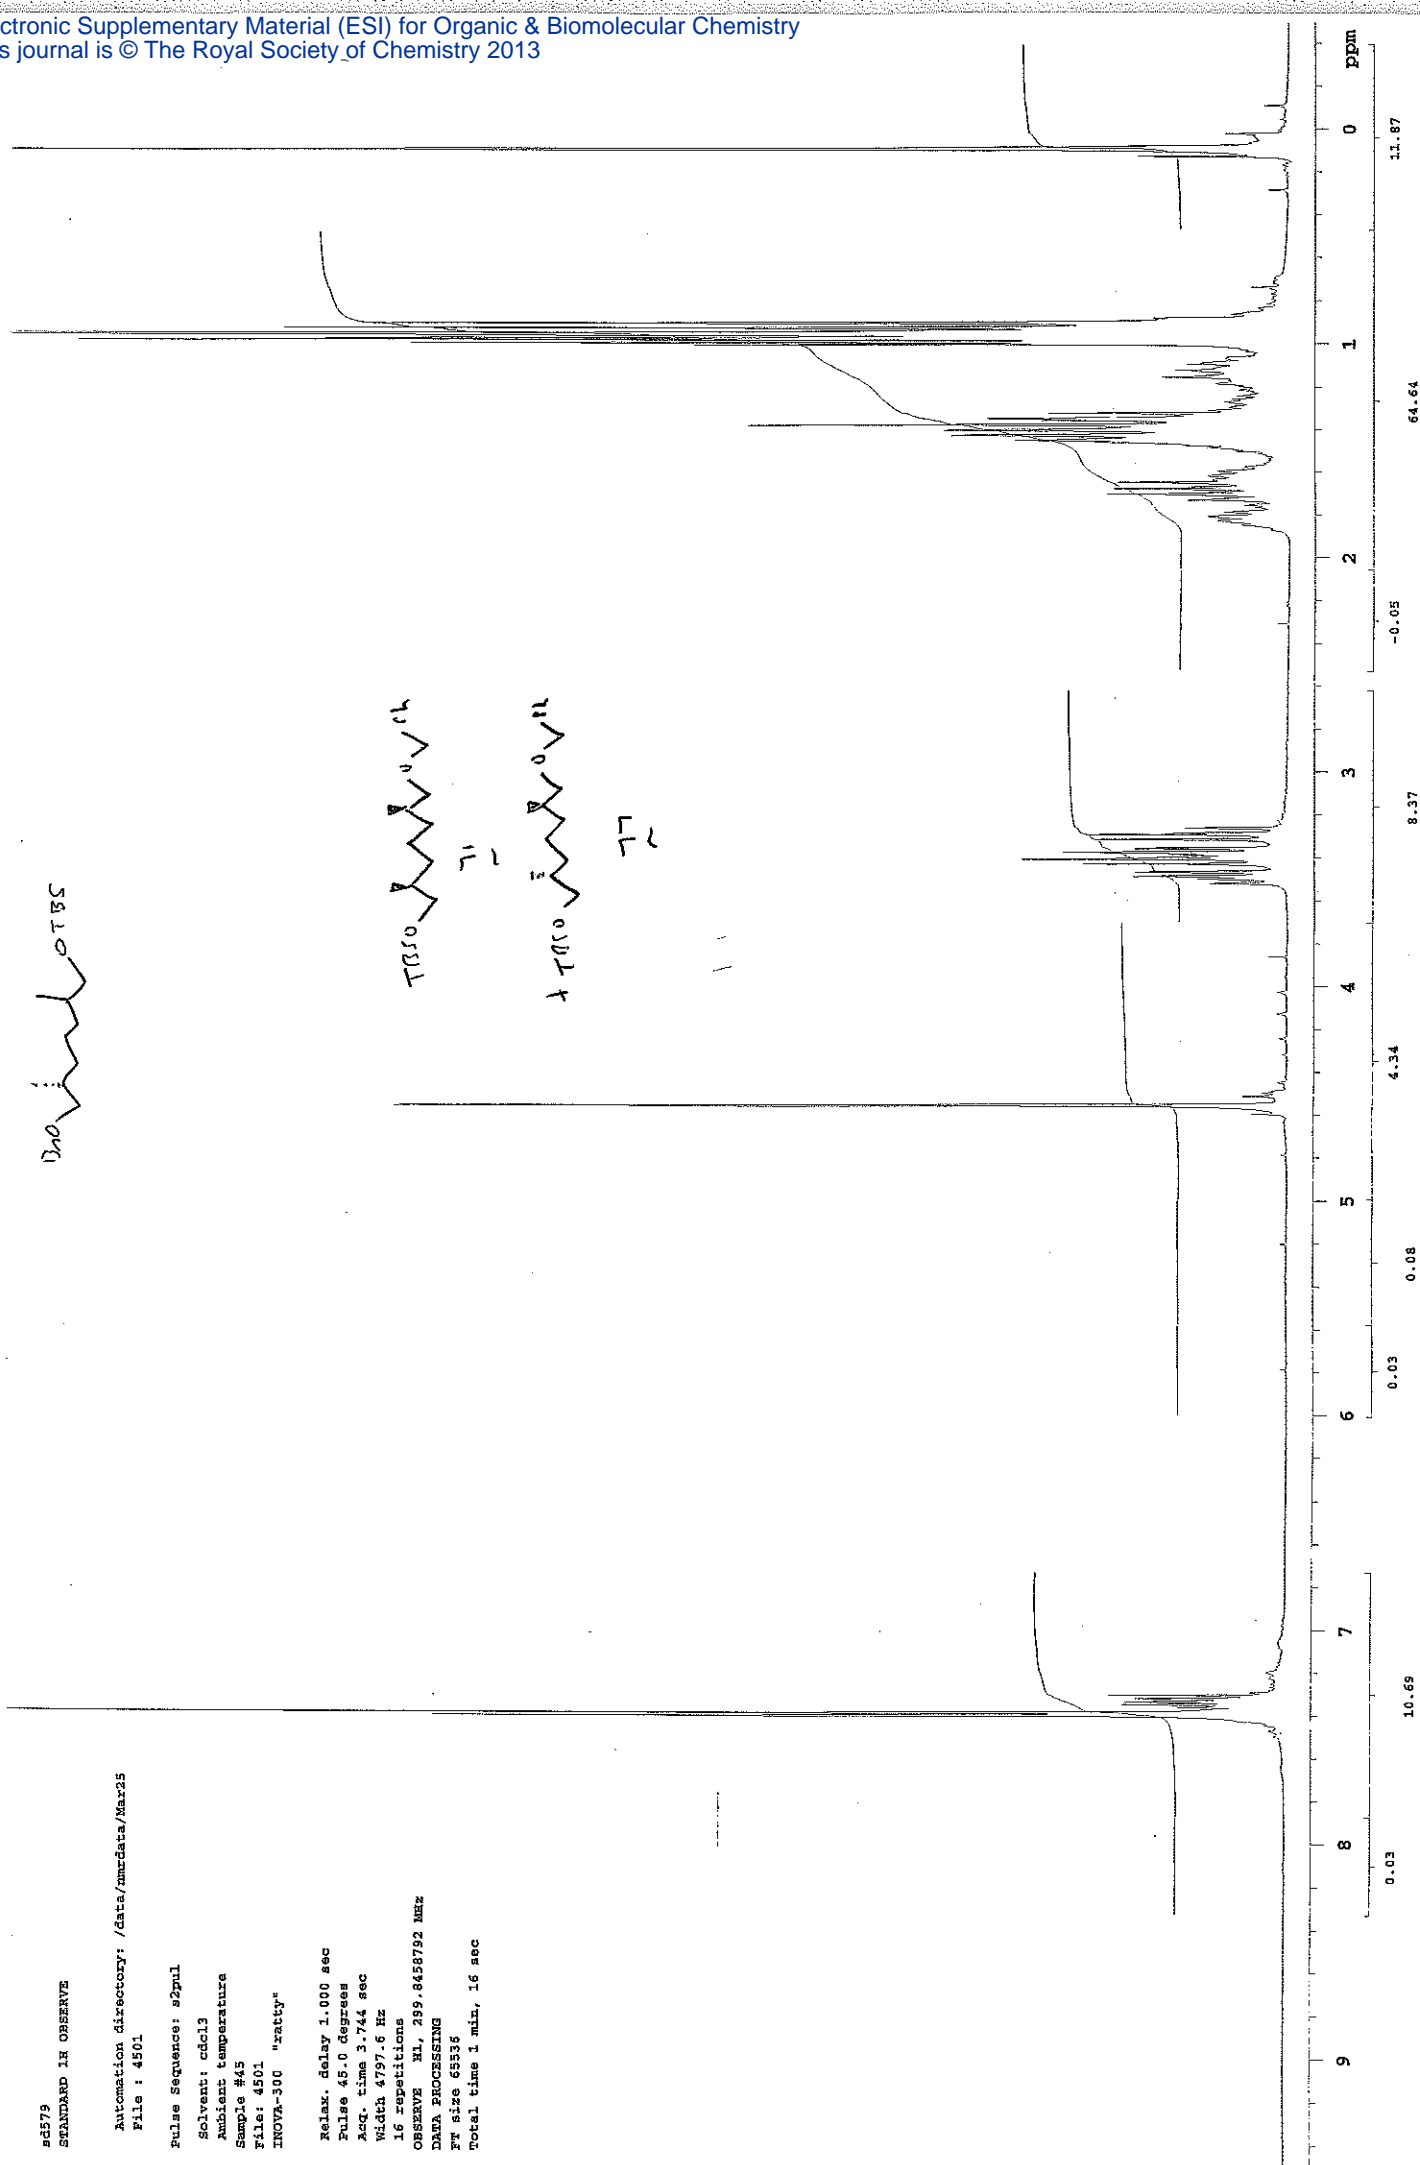

0.03

10.69

၈

5

— K

— **4**

25

**2013**

Expansions at 2.00 Hz/mm

64579

STANDARD JH OBSERVE

Automation directory: /data/nmrdata/Mar25  
File : 4501

File : 4501

Pulse Sequence: s2pul

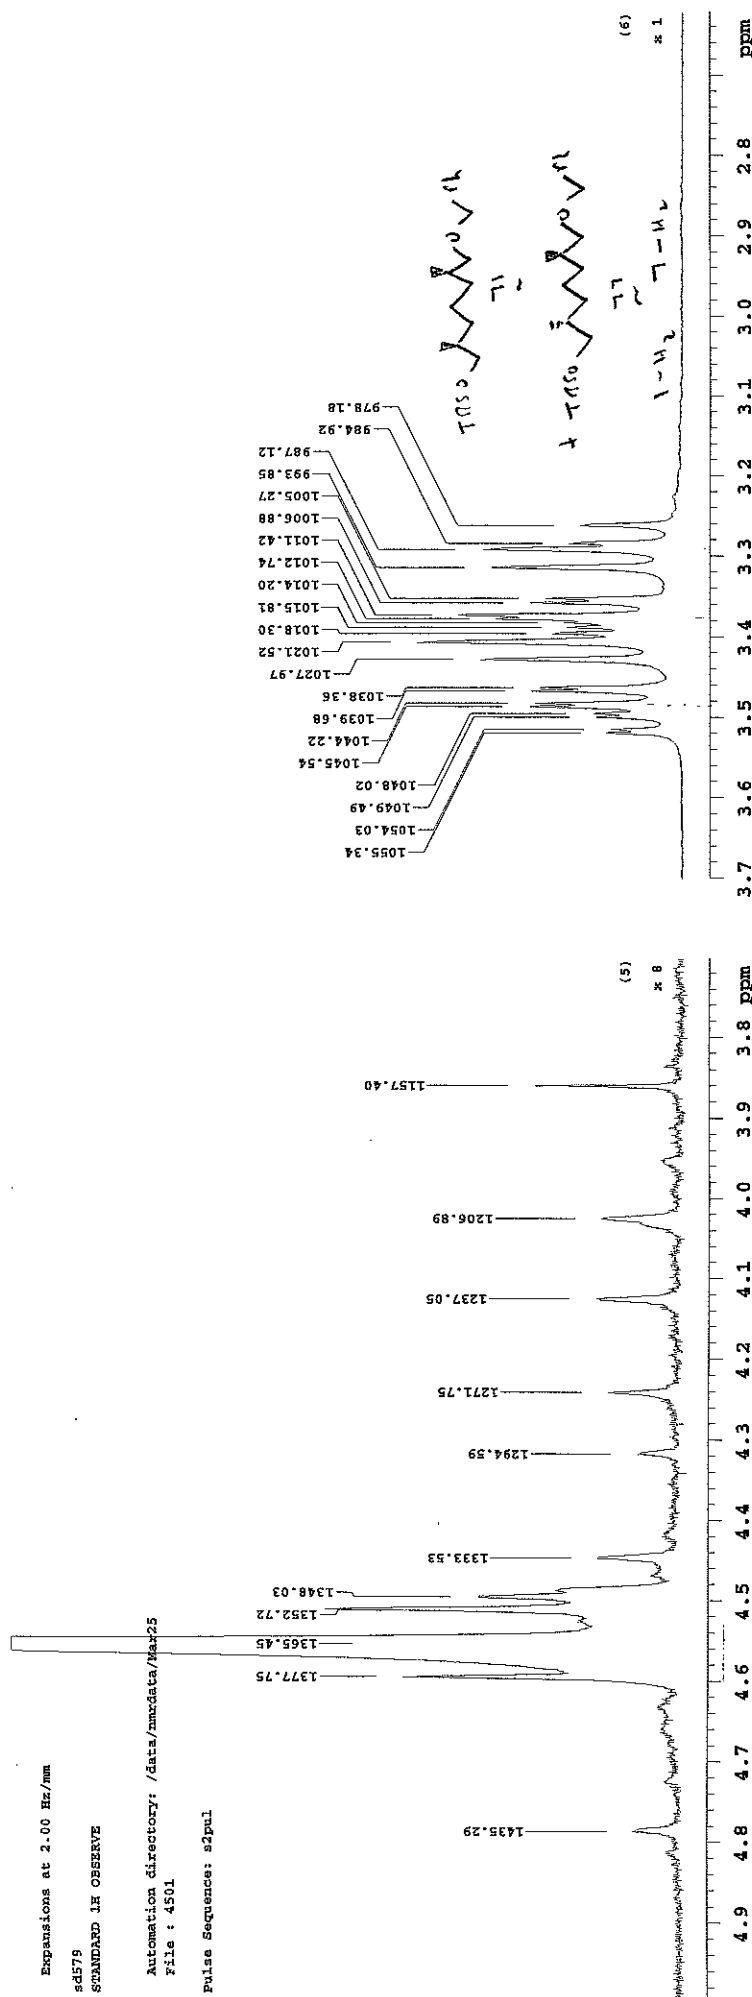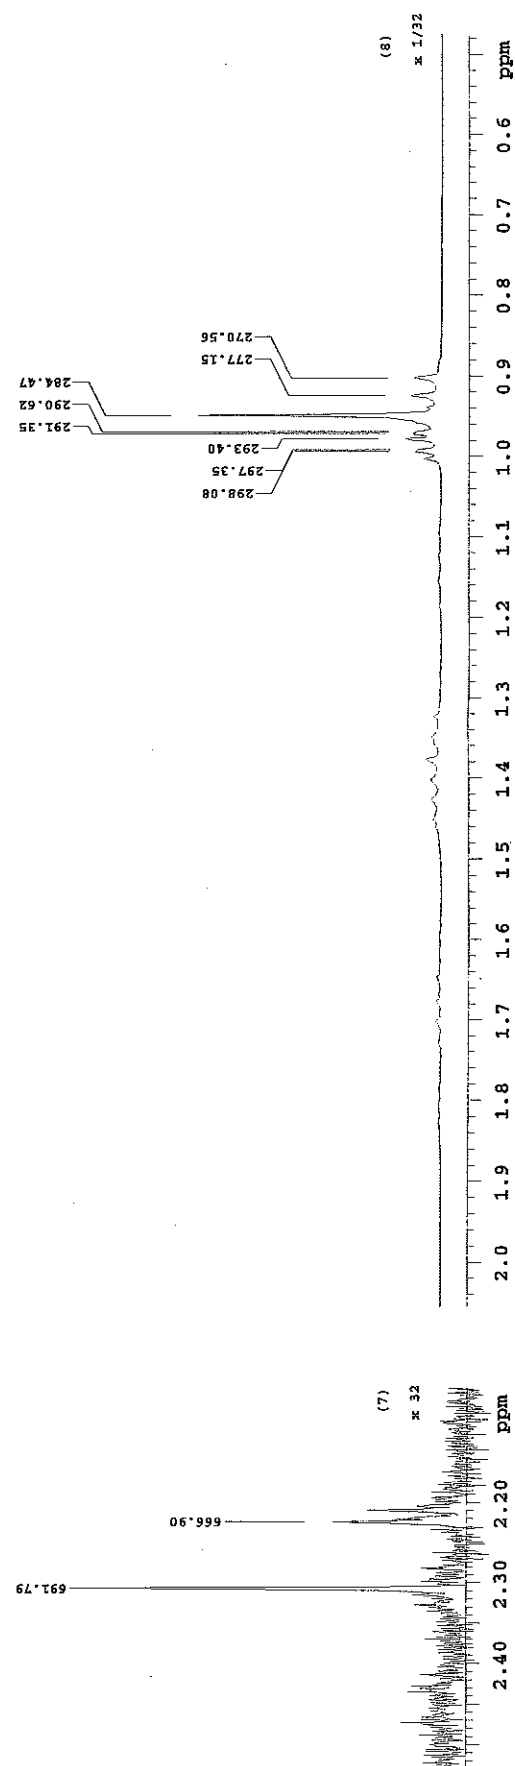

ad590

STANDARD 1K OBSERVE

Automation directory: /data/mrdata/Apr06  
File: 1302

Pulse Sequence: s2pul

Solvent: cdcl3

Ambient temperature

Sample #13

File: 1302

INOVA-300 "ratty"

Relax. delay 1.000 sec

Pulse 45.0 degrees

Acq. time 3.744 sec

Width 4797.6 Hz

16 repetitions

OBSERVE M1, 299.8458792 MHz

DATA PROCESSING

FT size 65536

Total time 1 min, 16 sec

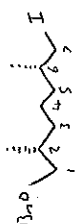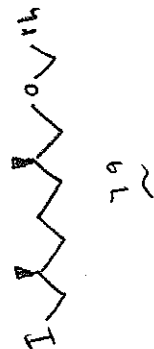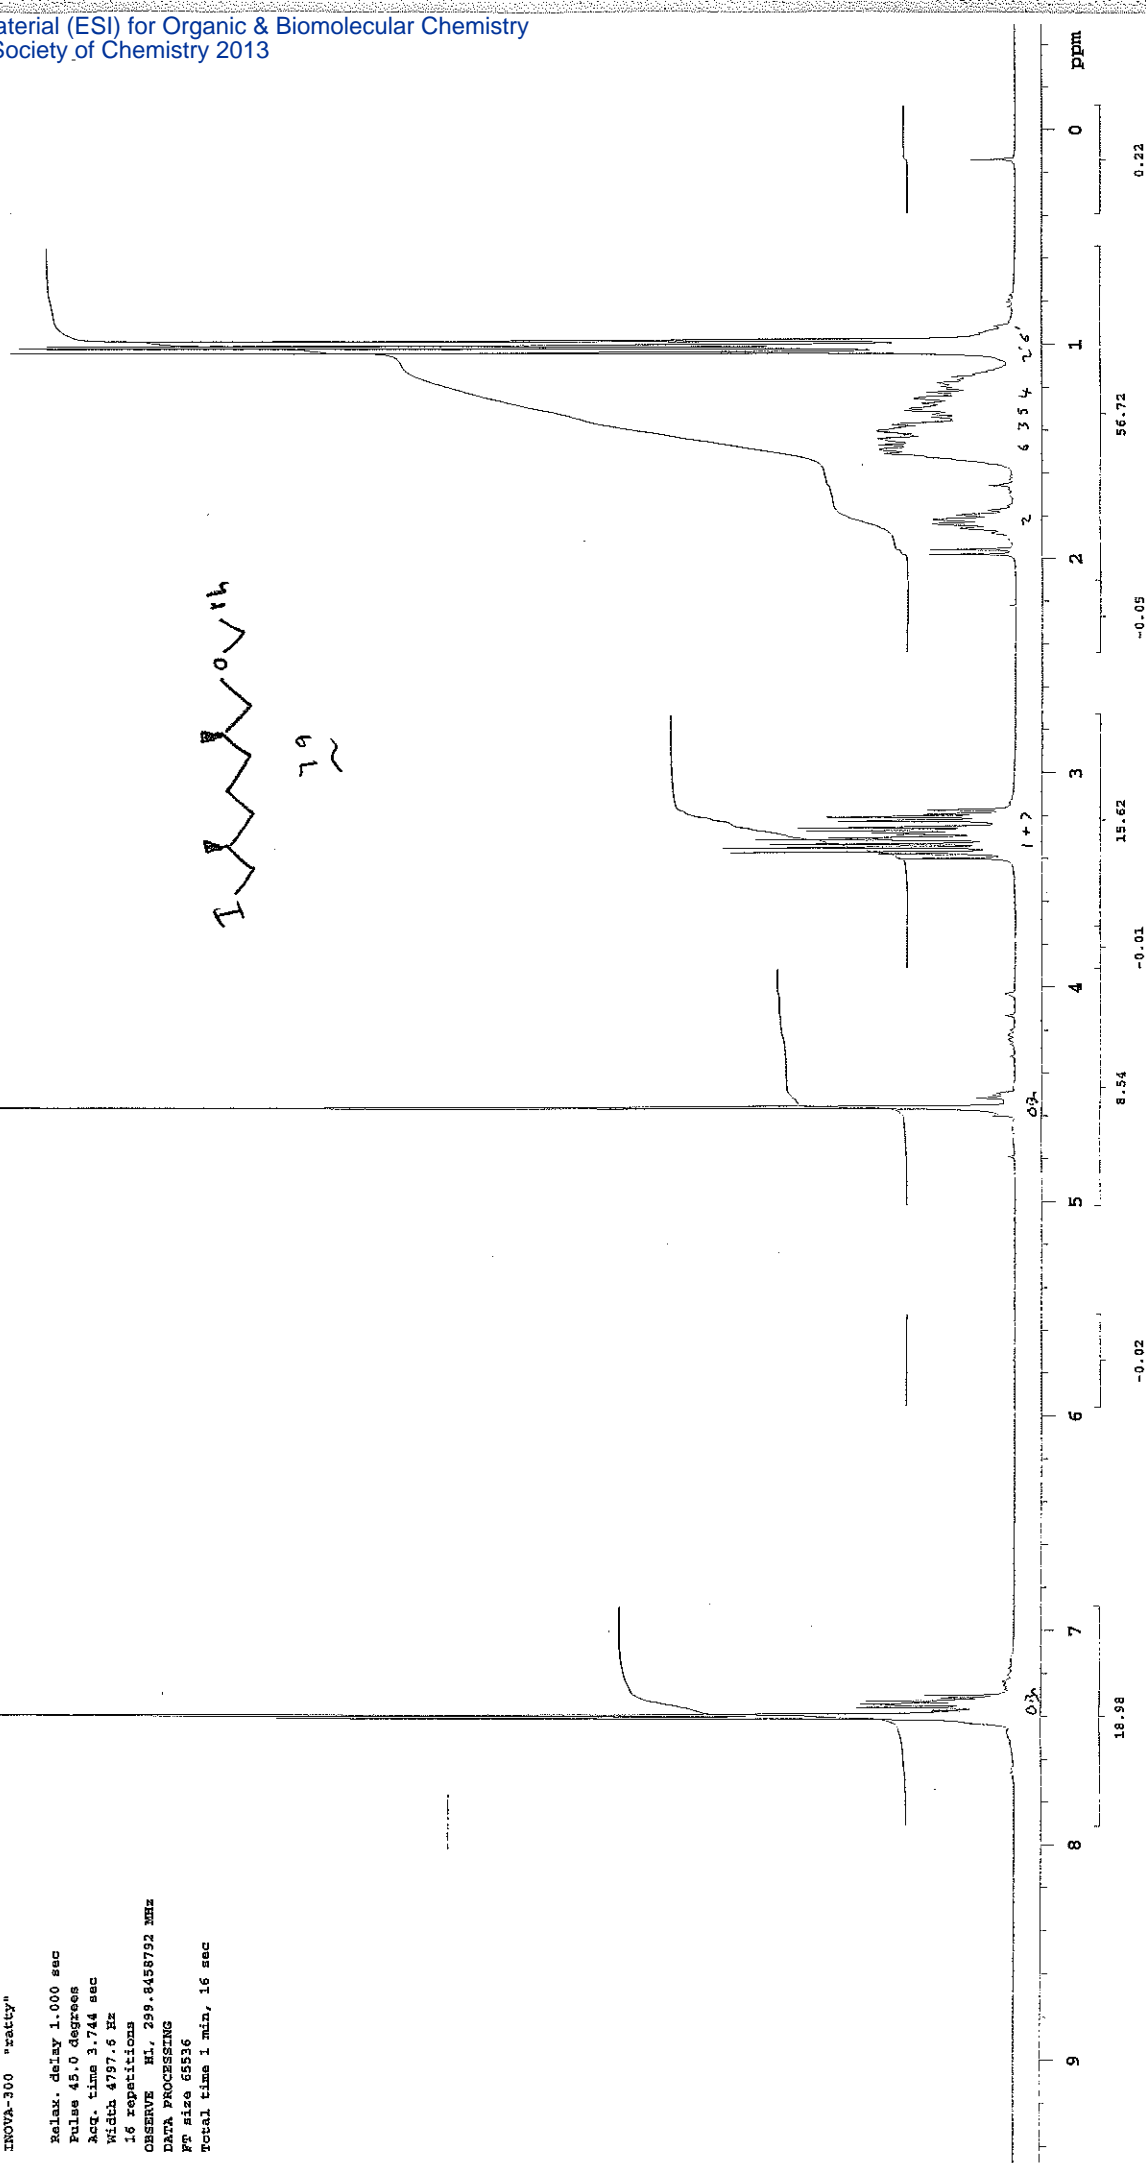

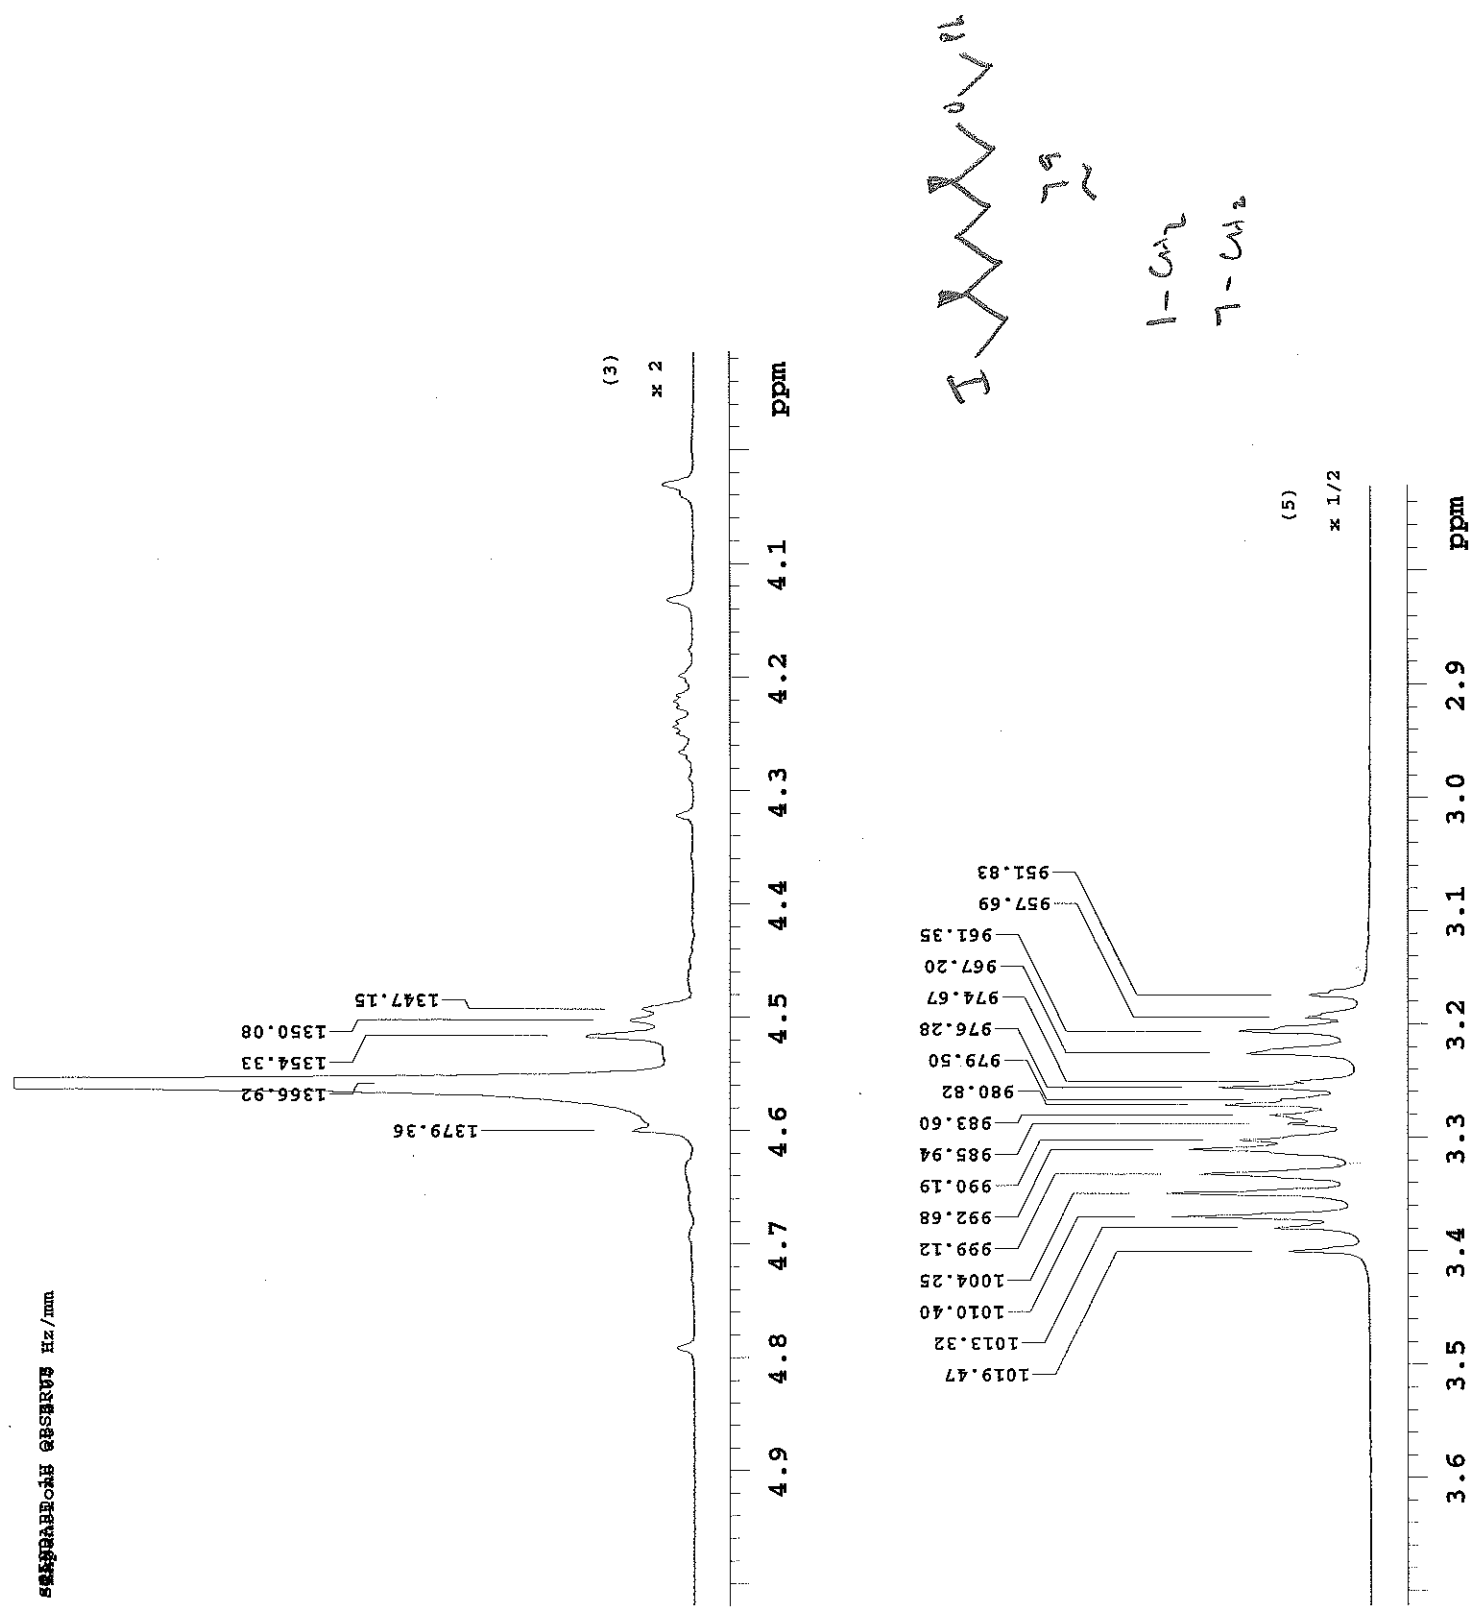

Pulse Sequence: s2pul  
Solvent: cdcl3  
Ambient temperature  
Sample #13  
File: 1303  
INOVA-300 "ratty"

Relax. delay 1.000 sec  
Pulse 45.0 degrees  
Acq. time 1.815 sec  
Width 1850.1 Hz  
512 repetitions  
OPERATION C13, 75.3962883 MHz  
DECOUPLE H1, 299.8473786 MHz  
Power 37 dB  
continuously on  
WALTZ-16 modulated  
DATA PROCESSING  
Line broadening 1.0 Hz  
F1 size 131072  
Total time 24 min, 5 sec

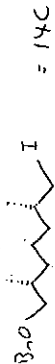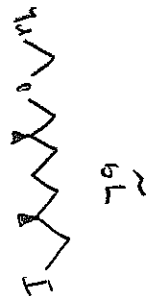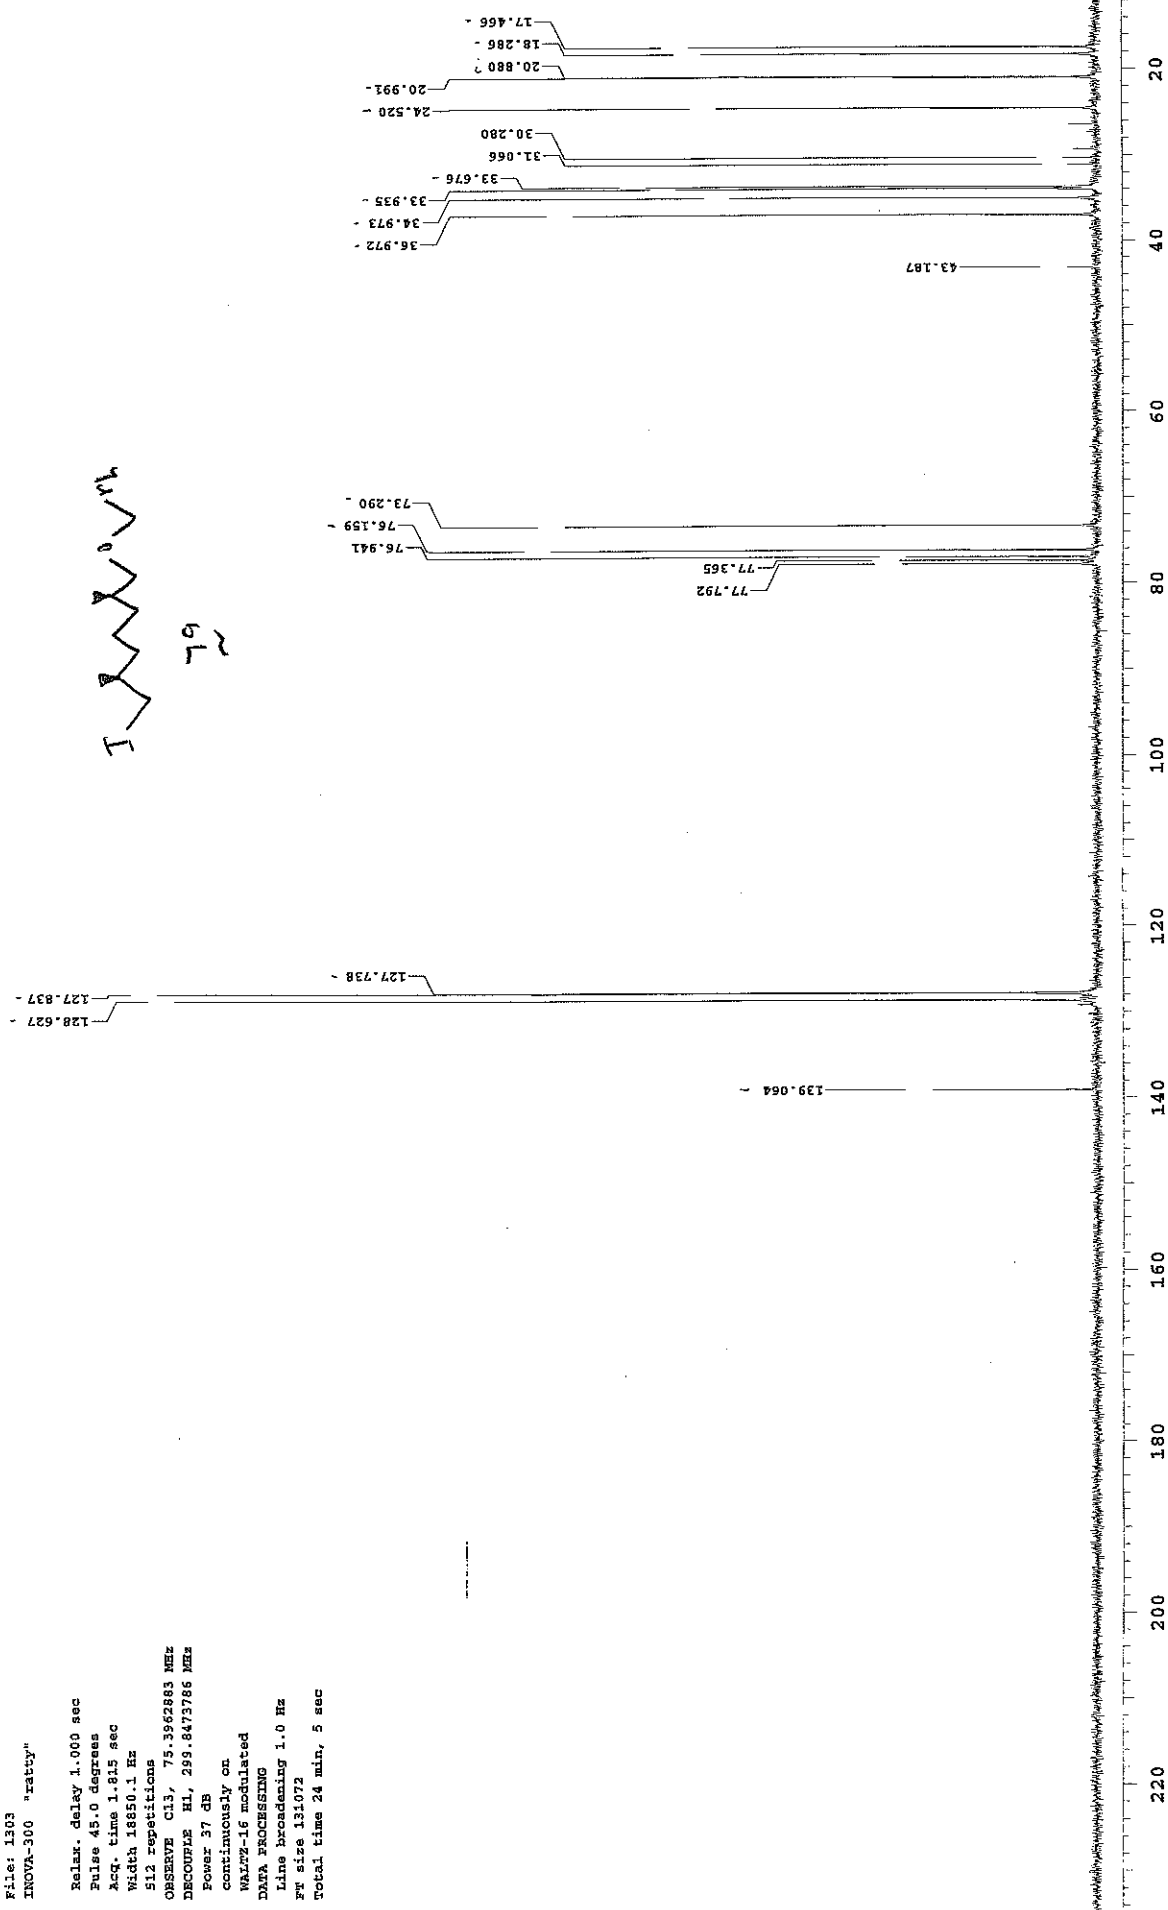

sd584

STANDARD 1H OBSERVE

Automation directory: /data/nmrdata/Mar30

File : 3902

Pulse Sequence: s2pul

Solvent: cdcl3

Ambient temperature

Sample #39

File: 3902

INOVA-300 "raty"

Relax. delay 1.000 sec

Pulse 45.0 degrees

Acq. time 3.744 sec

Width 4797.6 Hz

16 repetitions

OBSERVE RU, 299.8458792 MHz

DATA PROCESSING

FT size 65536

Total time 1 min, 16 sec

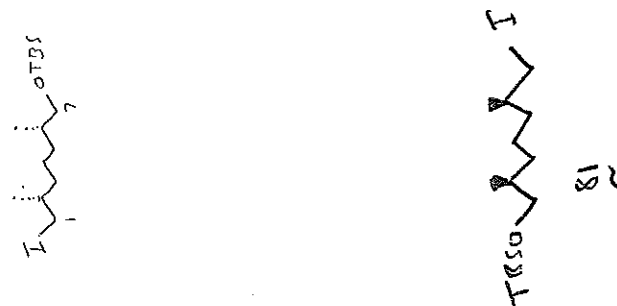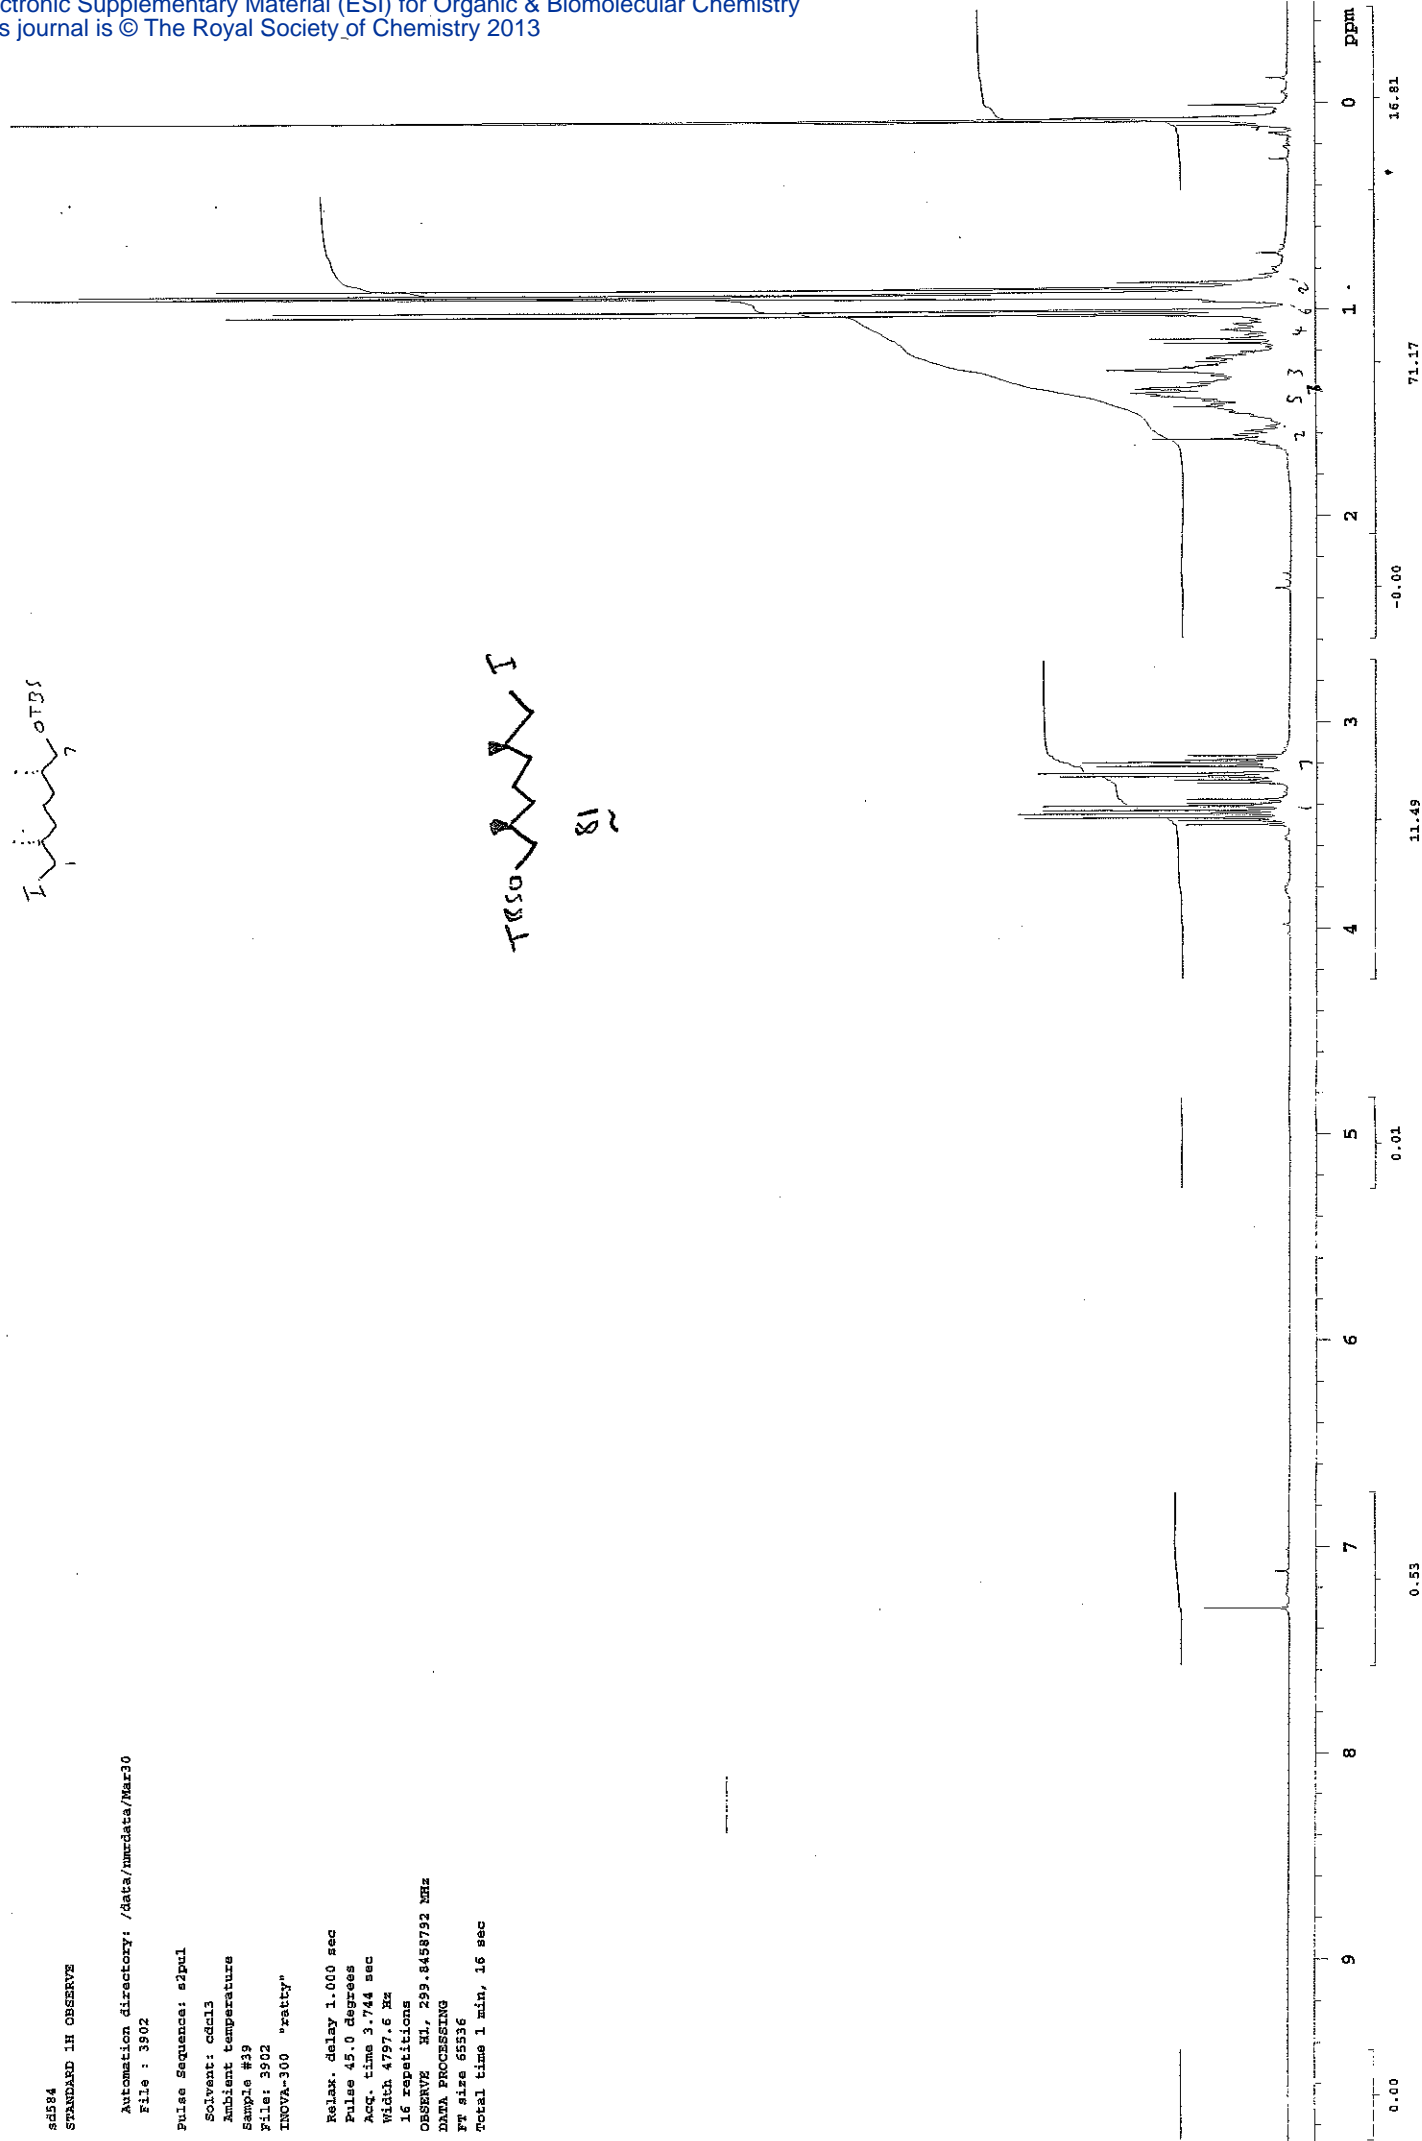



Expansions at 2.00 Hz/mm

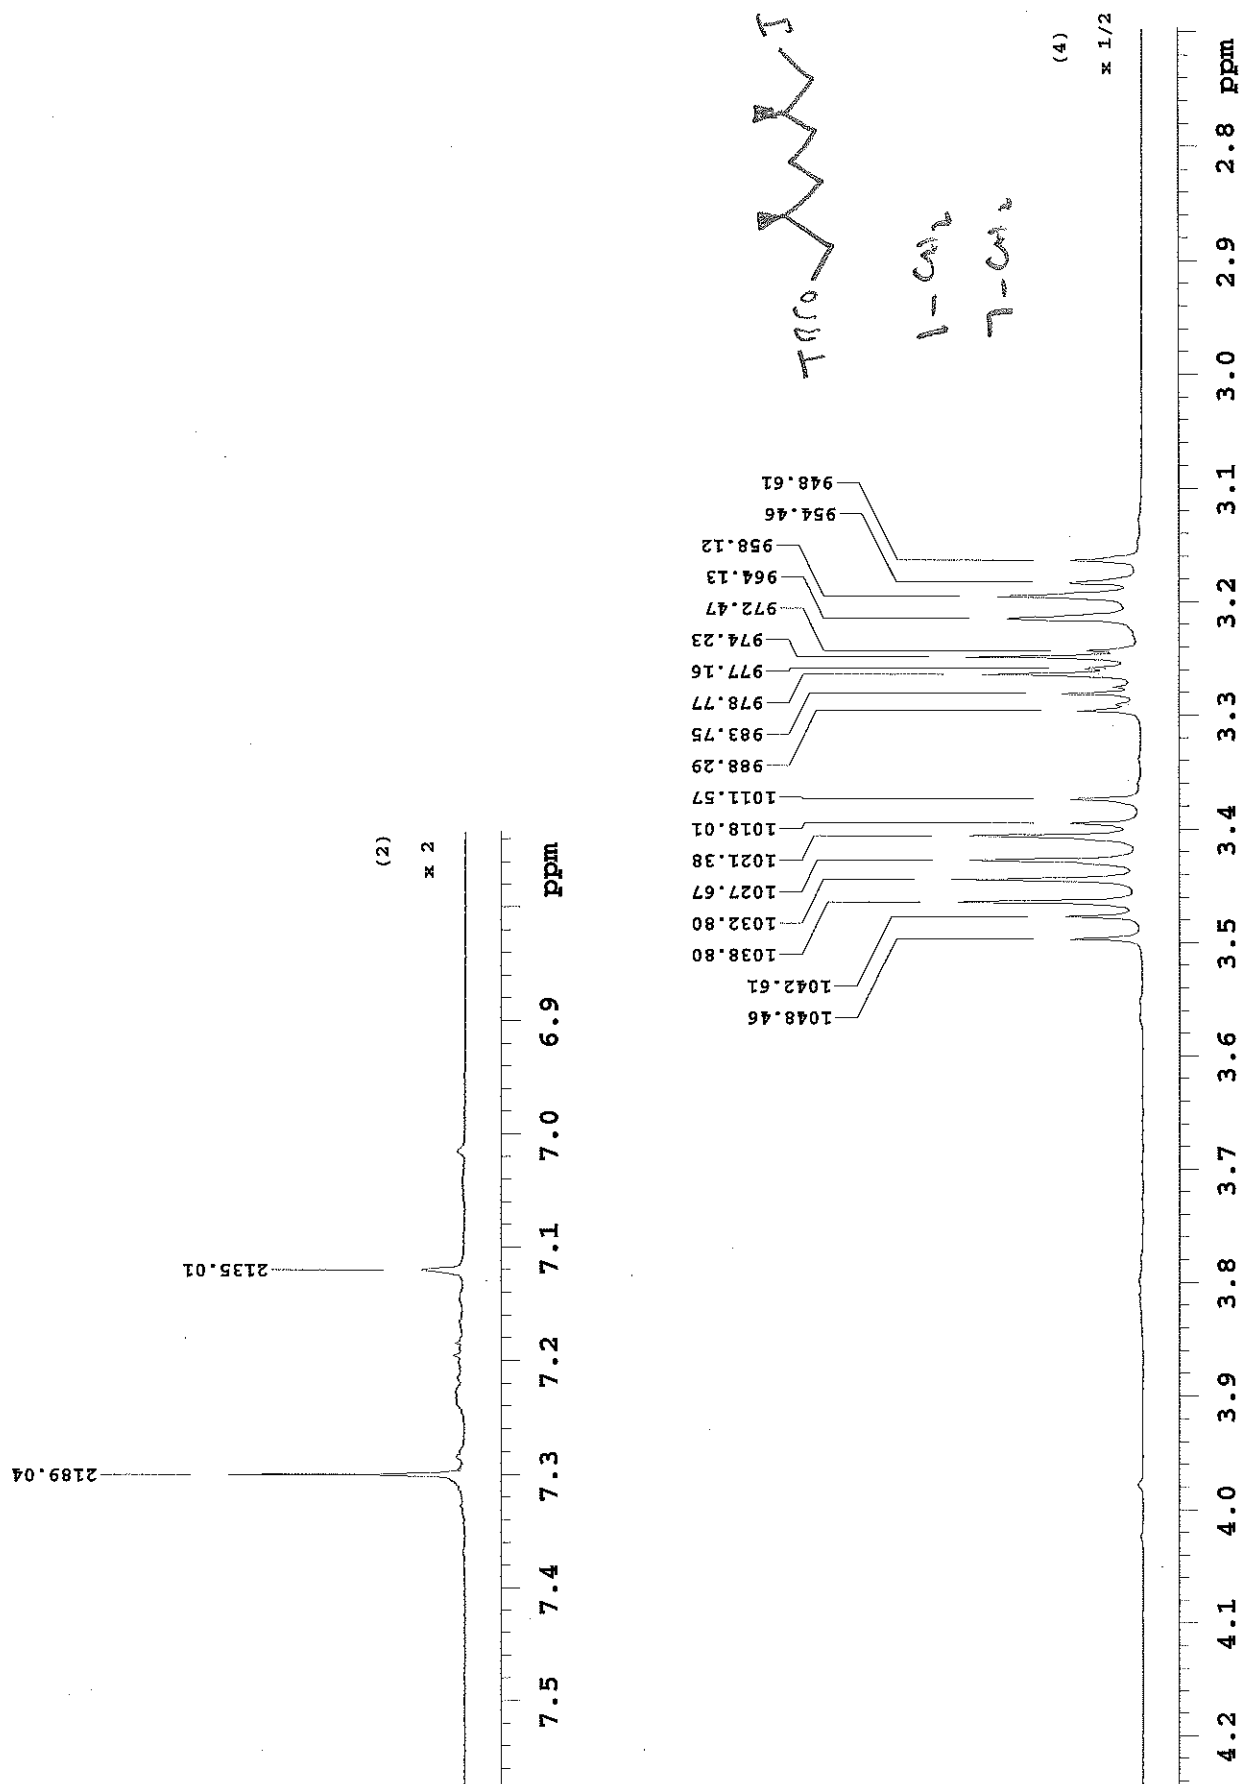

**13C OBSERVE**

pad=2 run with findz before acquisition

Pulse Sequence: s2pul

Solvent: cdcl3

Ambient temperature

Sample #35

File: 3501

INOVA-300 "ratty"

Relax. delay 1.000 sec

Pulse 45.0 degrees

Acq. time 1.815 sec

Width 18850.1 Hz

64 repetitions

OBSERVE C13, 75.3962883 MHz

DECOUPLE H1, 299.8473786 MHz

Power 37 dB

continuously on

WALTZ-16 modulated

## DATA PROCESSING

## Line broadening

mm size 131072

**Total time 12 m**

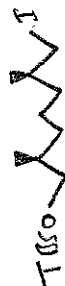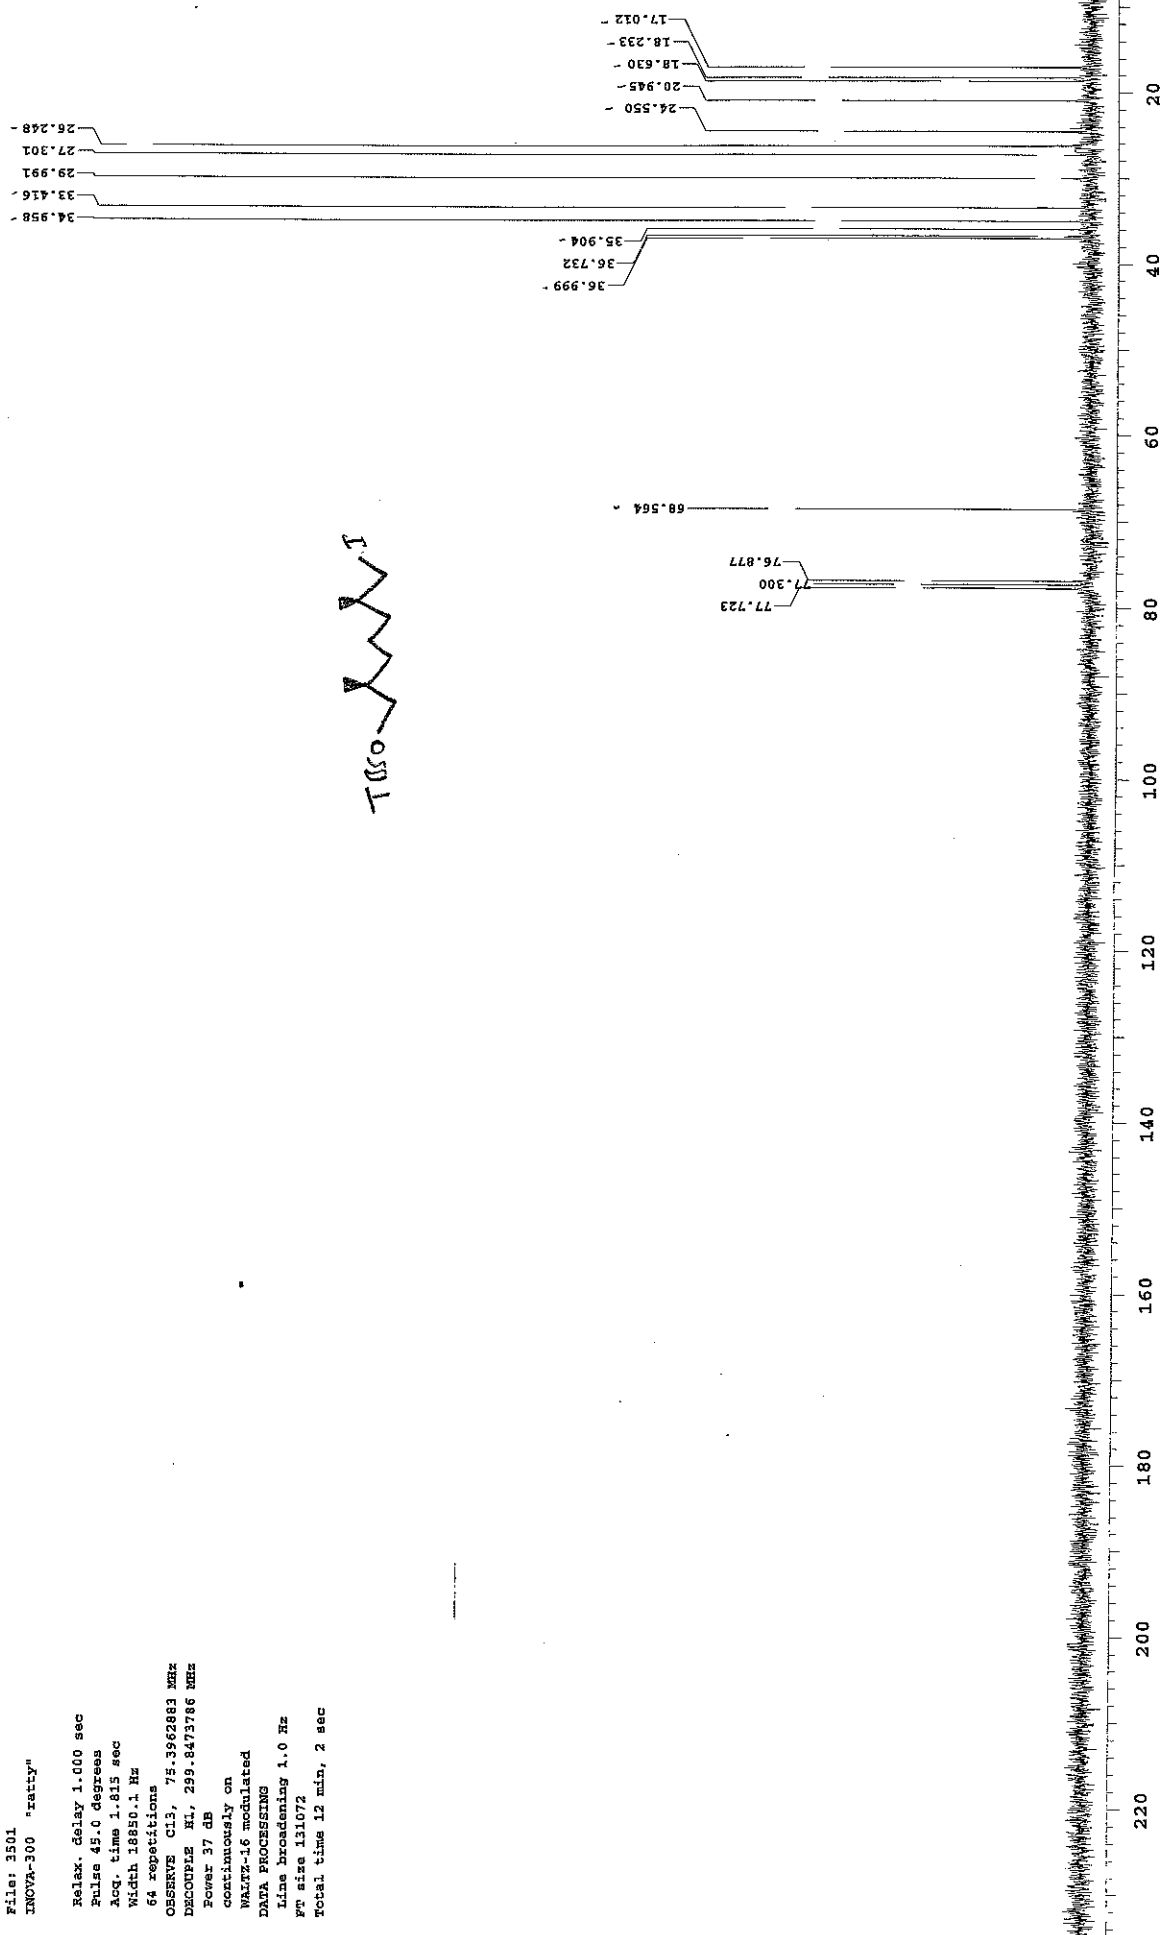

sd592  
STANDARD 1H OBSERVE

Automation directory: /data/nmrdata/Apr26  
File : 0702

Pulse Sequence: s2pul  
Solvent: cdcl3  
Ambient temperature  
Sample #7  
File: 0702  
INOVA-300 "ratty"

Relax. delay 1.000 sec  
Pulse 45.0 degrees  
Acq. time 3.744 sec  
Width 4797.6 Hz  
16 repetitions  
OBSERVE XL, 299.8458792 MHz  
DATA PROCESSING  
F2 size 65536  
Total time 1 min, 16 sec

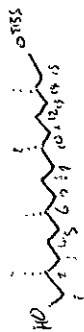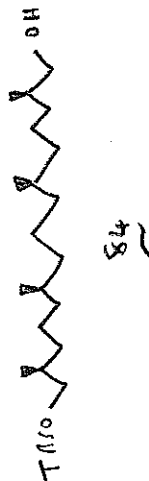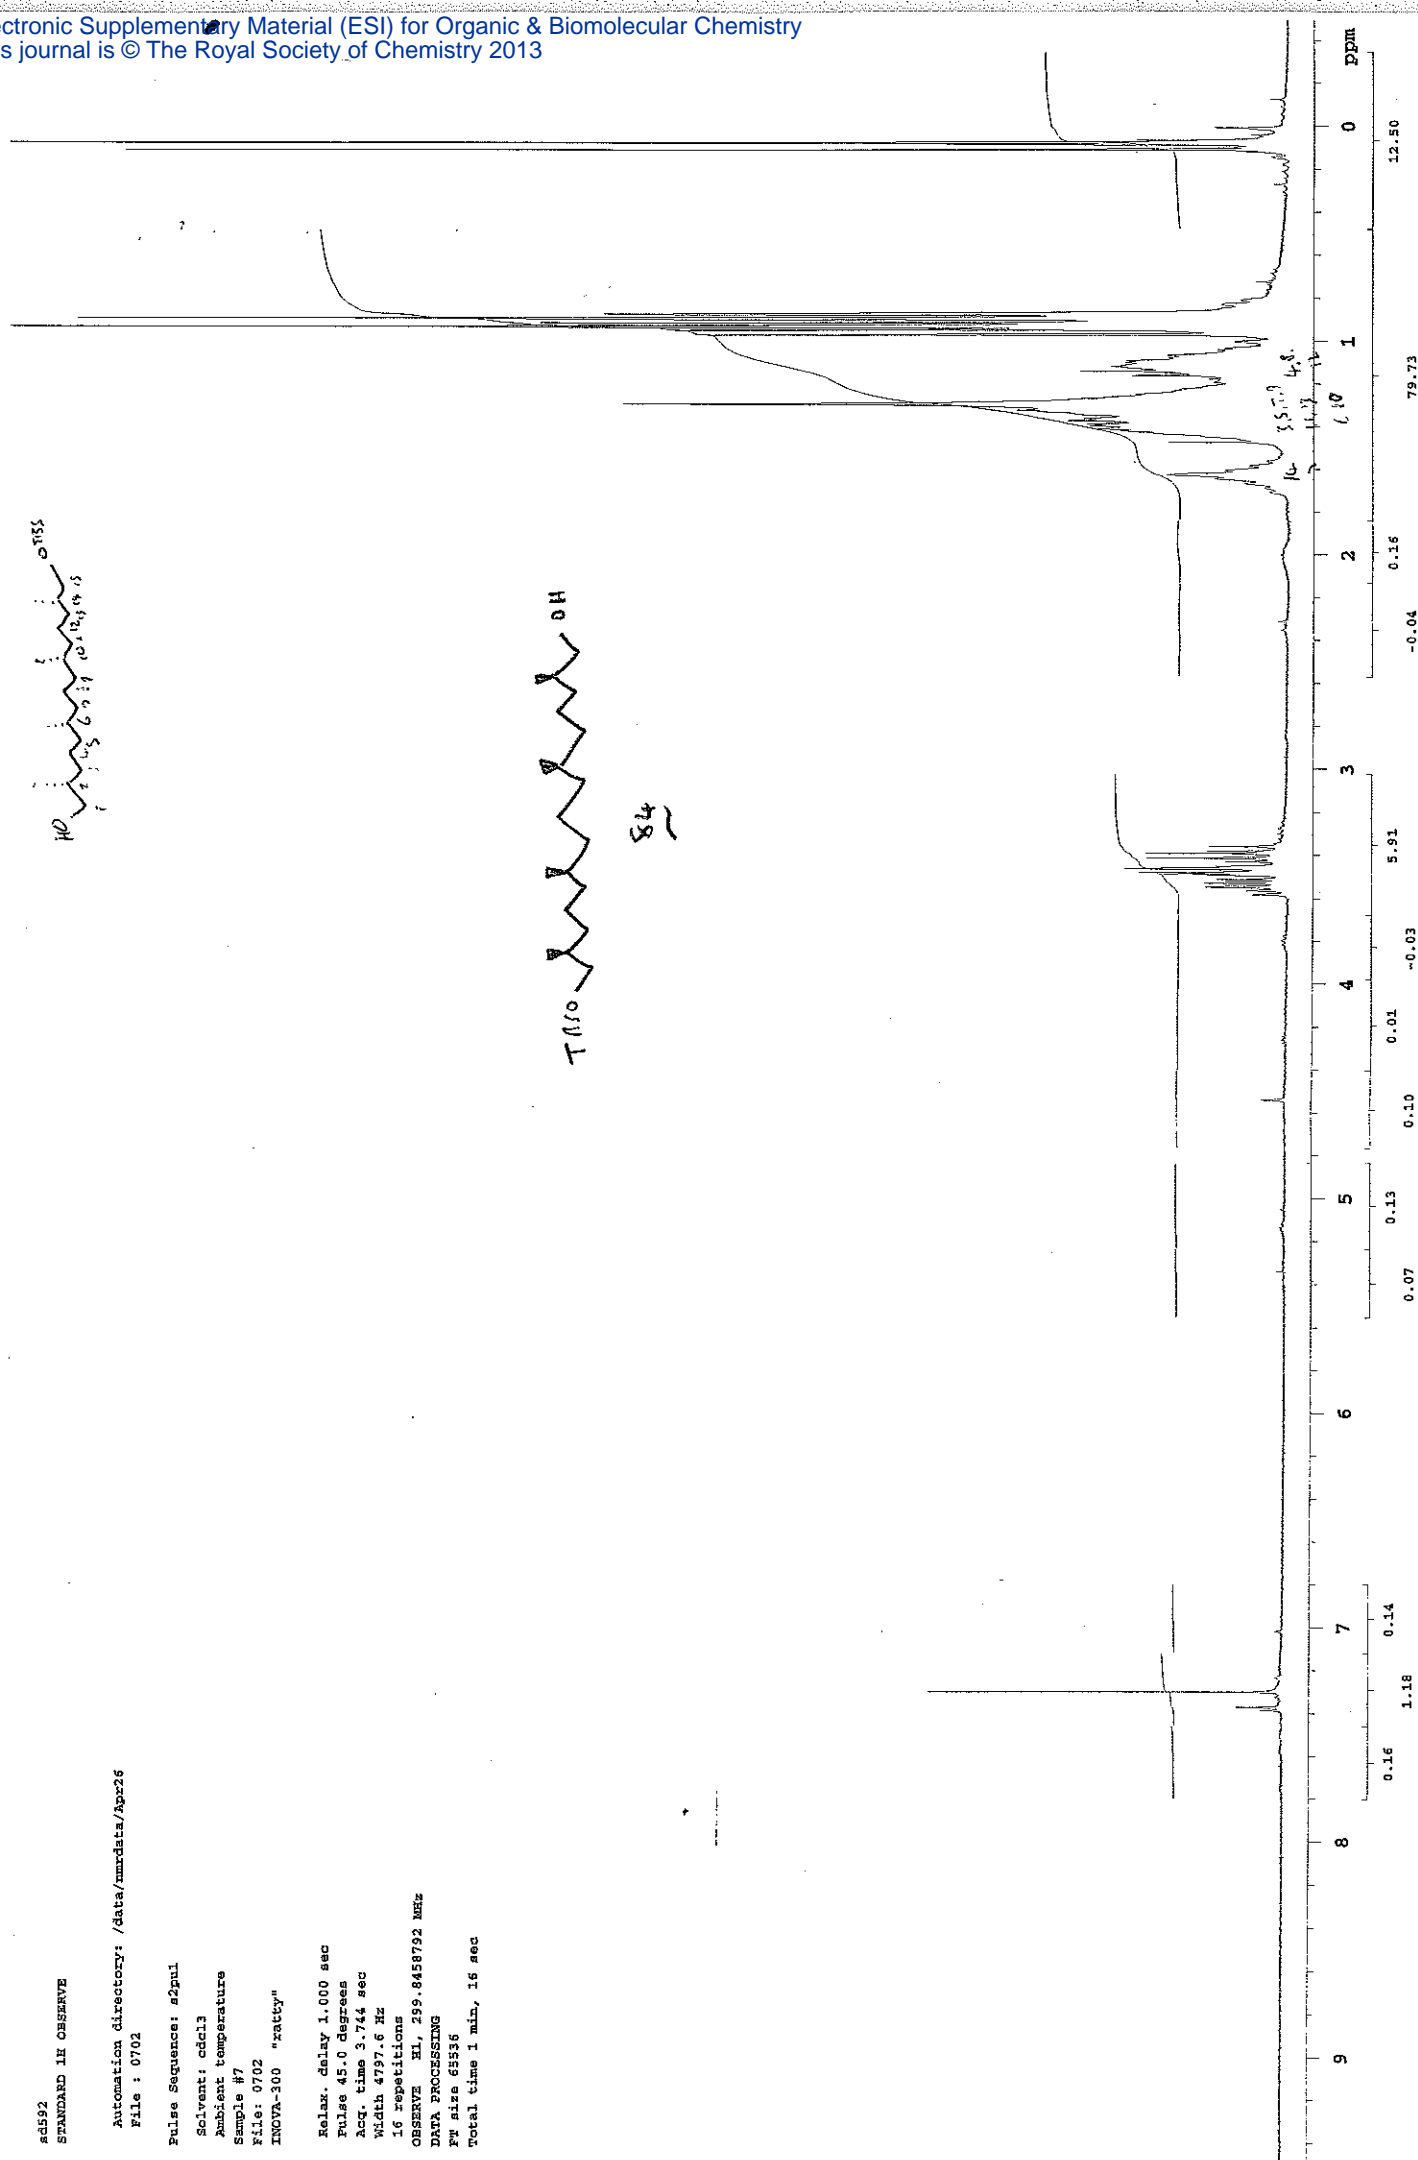

STANDARD 1H OBSERVE  
ssd592

Automation directory: /data/xmrdata/2pr25  
File : 0703

Pulse Sequence: s2pul  
Solvent: cdcl3  
Ambient temperature  
Sample #7  
File: 0703  
INOVA-300 "xatxy"

Relax. delay 1.000 sec  
Pulse 45.0 degrees  
Acq. time 1.815 sec  
Width 18850.1 Hz  
256 repetitions  
OBSERVE C13, 75.3952893 MHz  
DECOUPLE H1, 299.8473786 MHz  
Power 37 dB  
continuously on  
WALTZ-16 modulated  
DATA PROCESSING  
Line broadening 1.0 Hz  
Fw size 131072  
Fw time 12 min, 2 sec

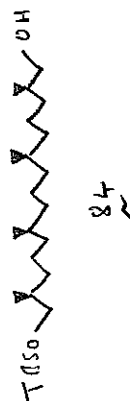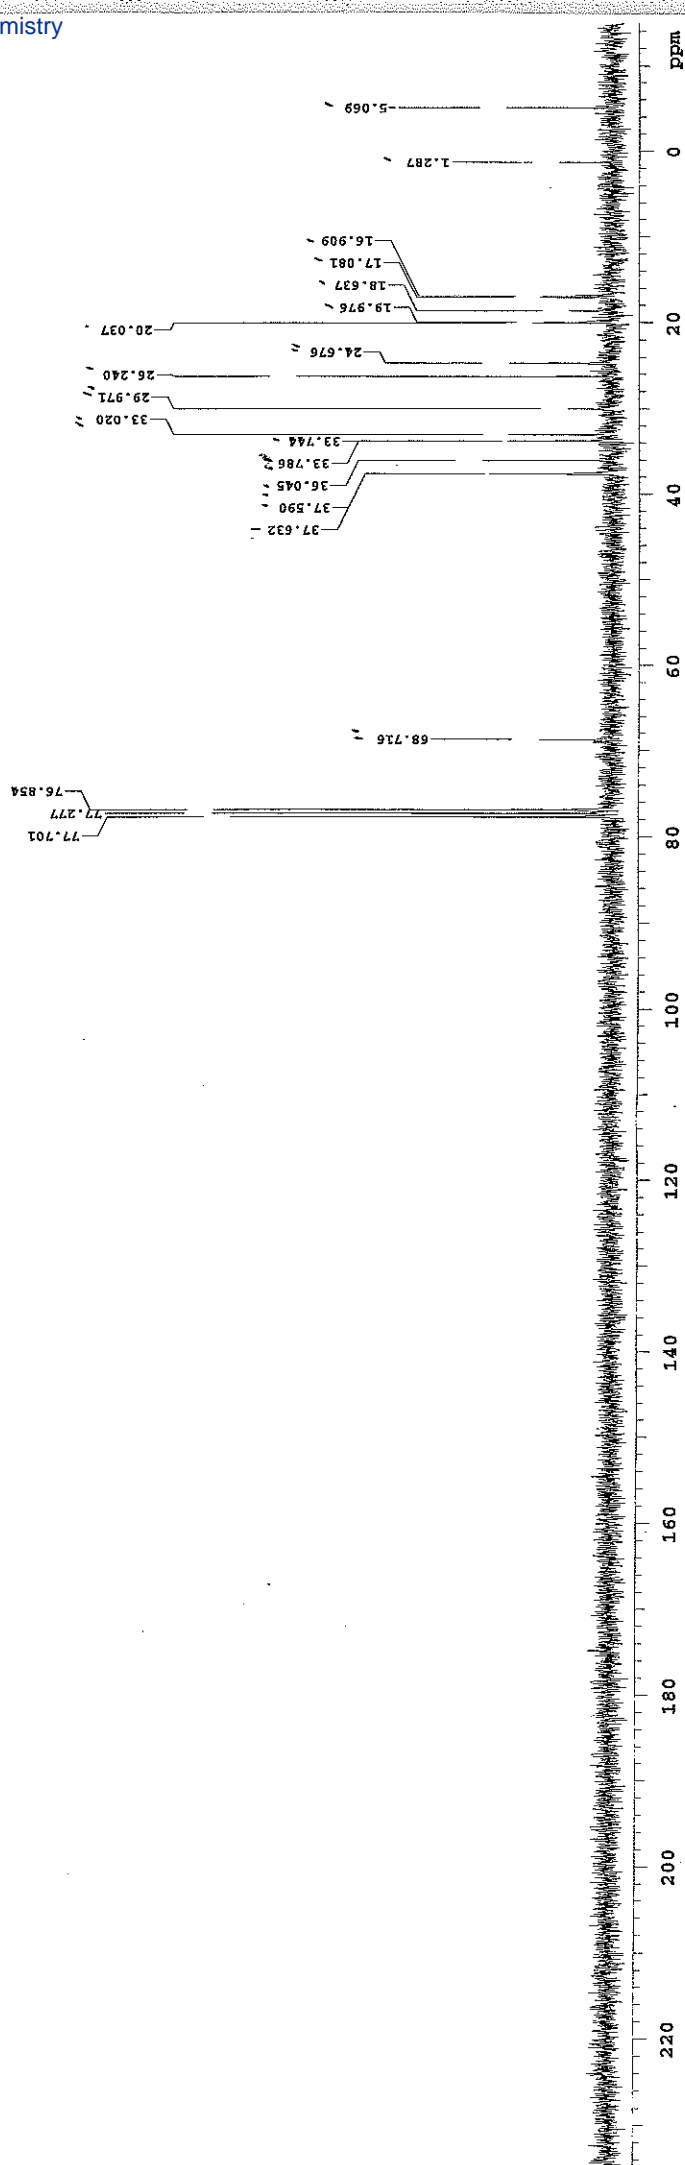

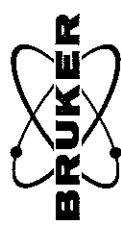

C<sub>20</sub>H<sub>42</sub>O<sub>2</sub>Si<sup>+</sup>  
FW = 342.30

nb101  
mPROTON CDCl<sub>3</sub> /opt/topspin ejt 32

Current Data Parameters  
NAME 2007-07-05-ejt-32  
EXPNO 10  
PROCNO 1  
F2 - Acquisition Parameters  
Date\_ 20070705  
Time 14.47  
INSTRUM spect  
PROBHD 5 mm TXI 1H/D-  
PULPROG zg30b  
TD 65536  
SOLVENT CDCl<sub>3</sub>  
NS 16  
DS 0  
SWH 10330.578 Hz  
FIDRES 0.157632 Hz  
AQ 3.1719923 sec  
RG 36  
DW 48.400 usec  
DE 13.76 usec  
TE 300.0 K  
D1 1.00000000 sec  
TD0 1  
===== CHANNEL f1 =====  
NUC1 1H  
P1 7.80 usec  
PL1 3.25 dB  
SFO1 500.1330885 MHz  
F2 - Processing parameters  
SI 32768  
SF 500.1300415 MHz  
WDW EM  
SSB 0  
LB 0.30 Hz  
GB 0  
PC 1.00

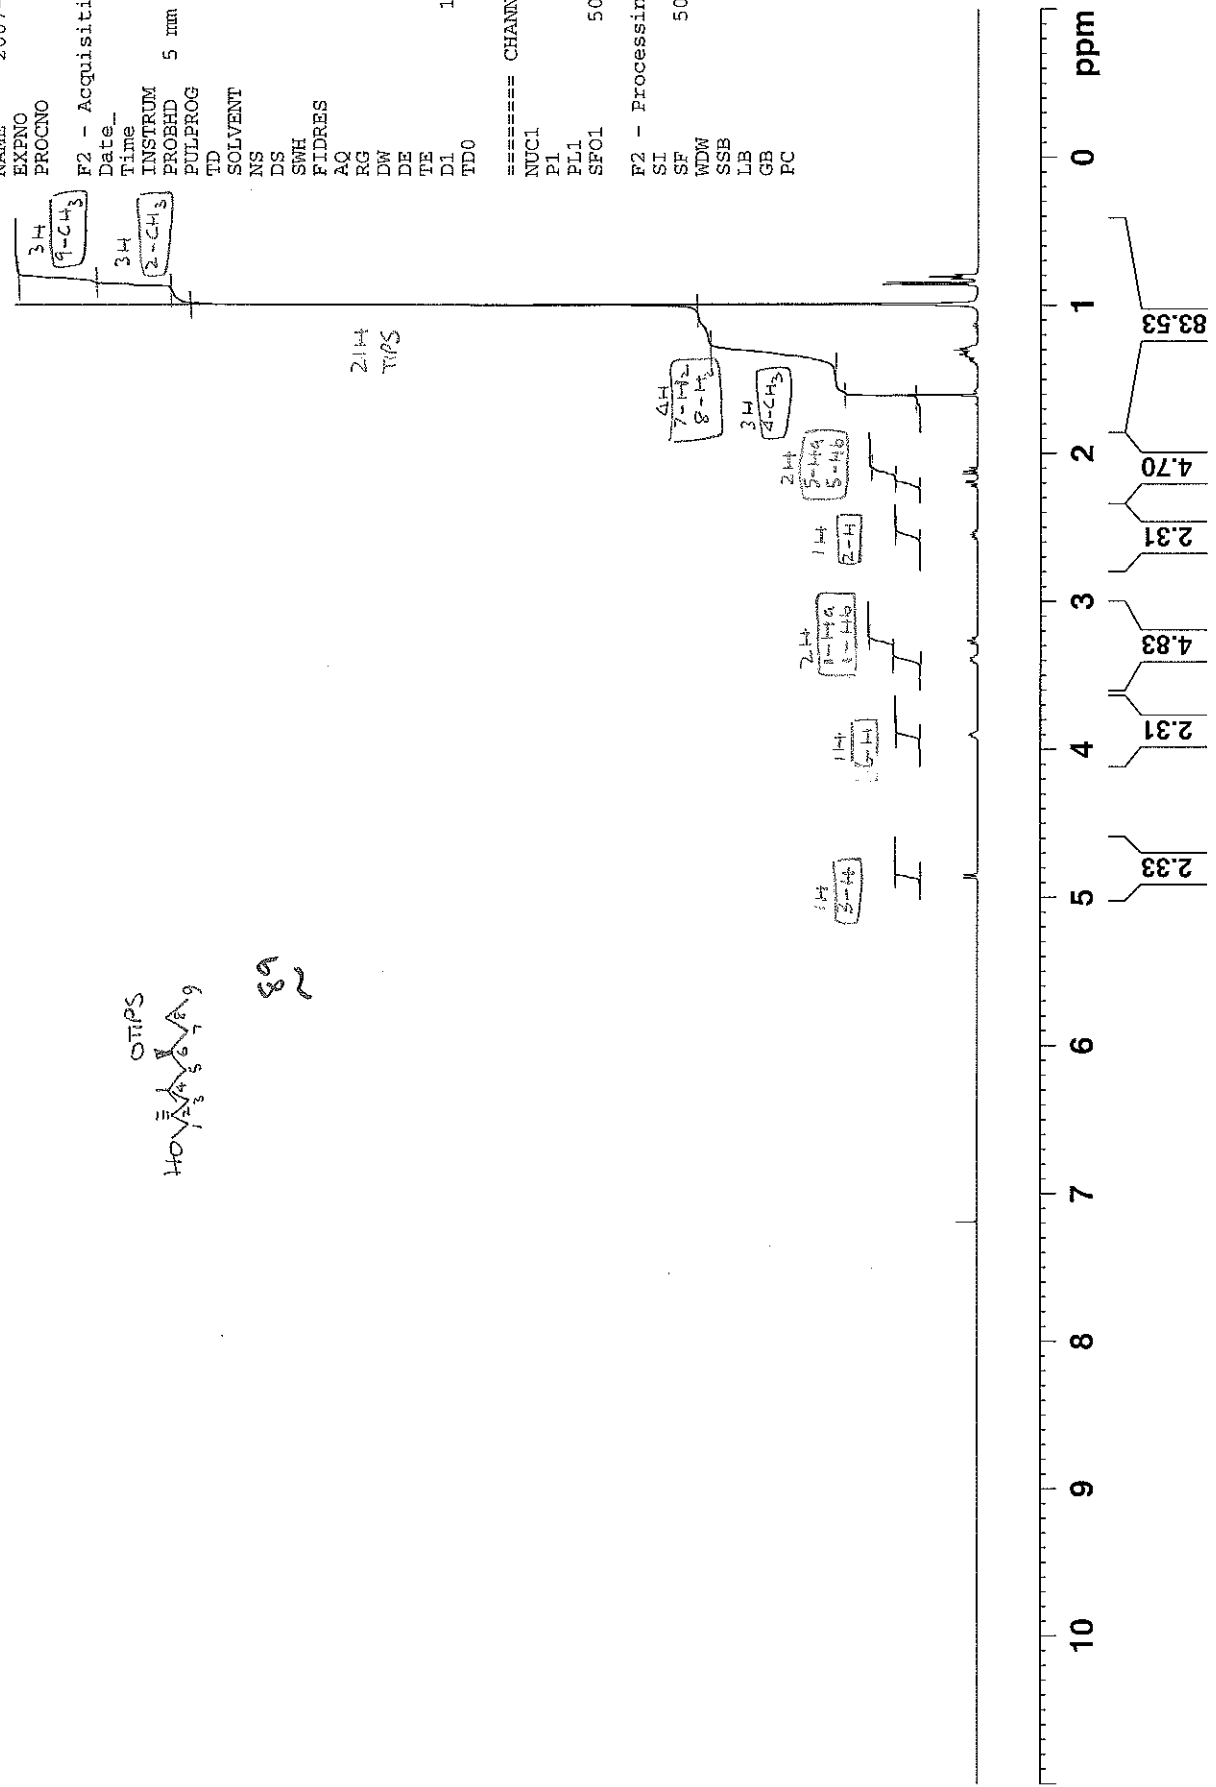

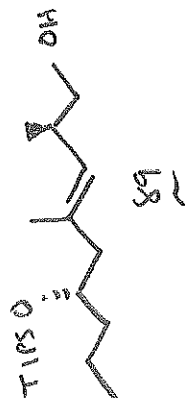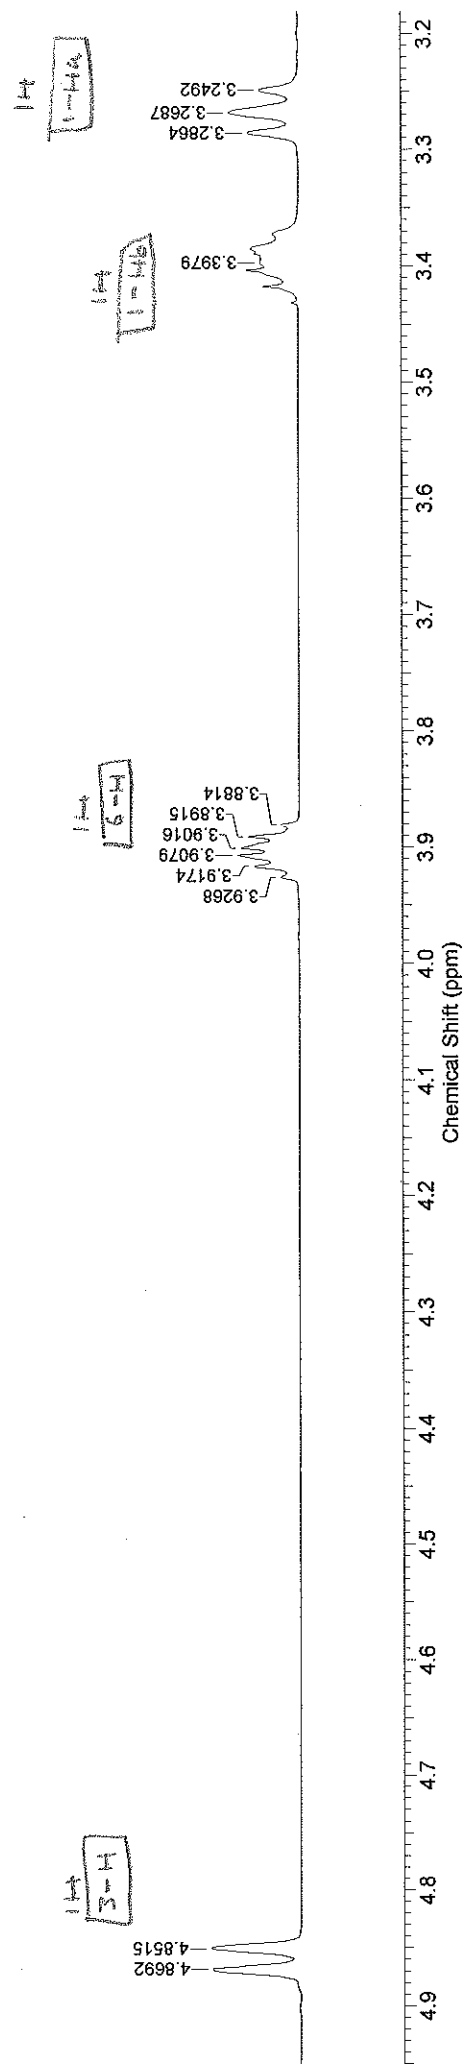

nb101 mPROTON CDCl3 /opt/topspin ejt 32

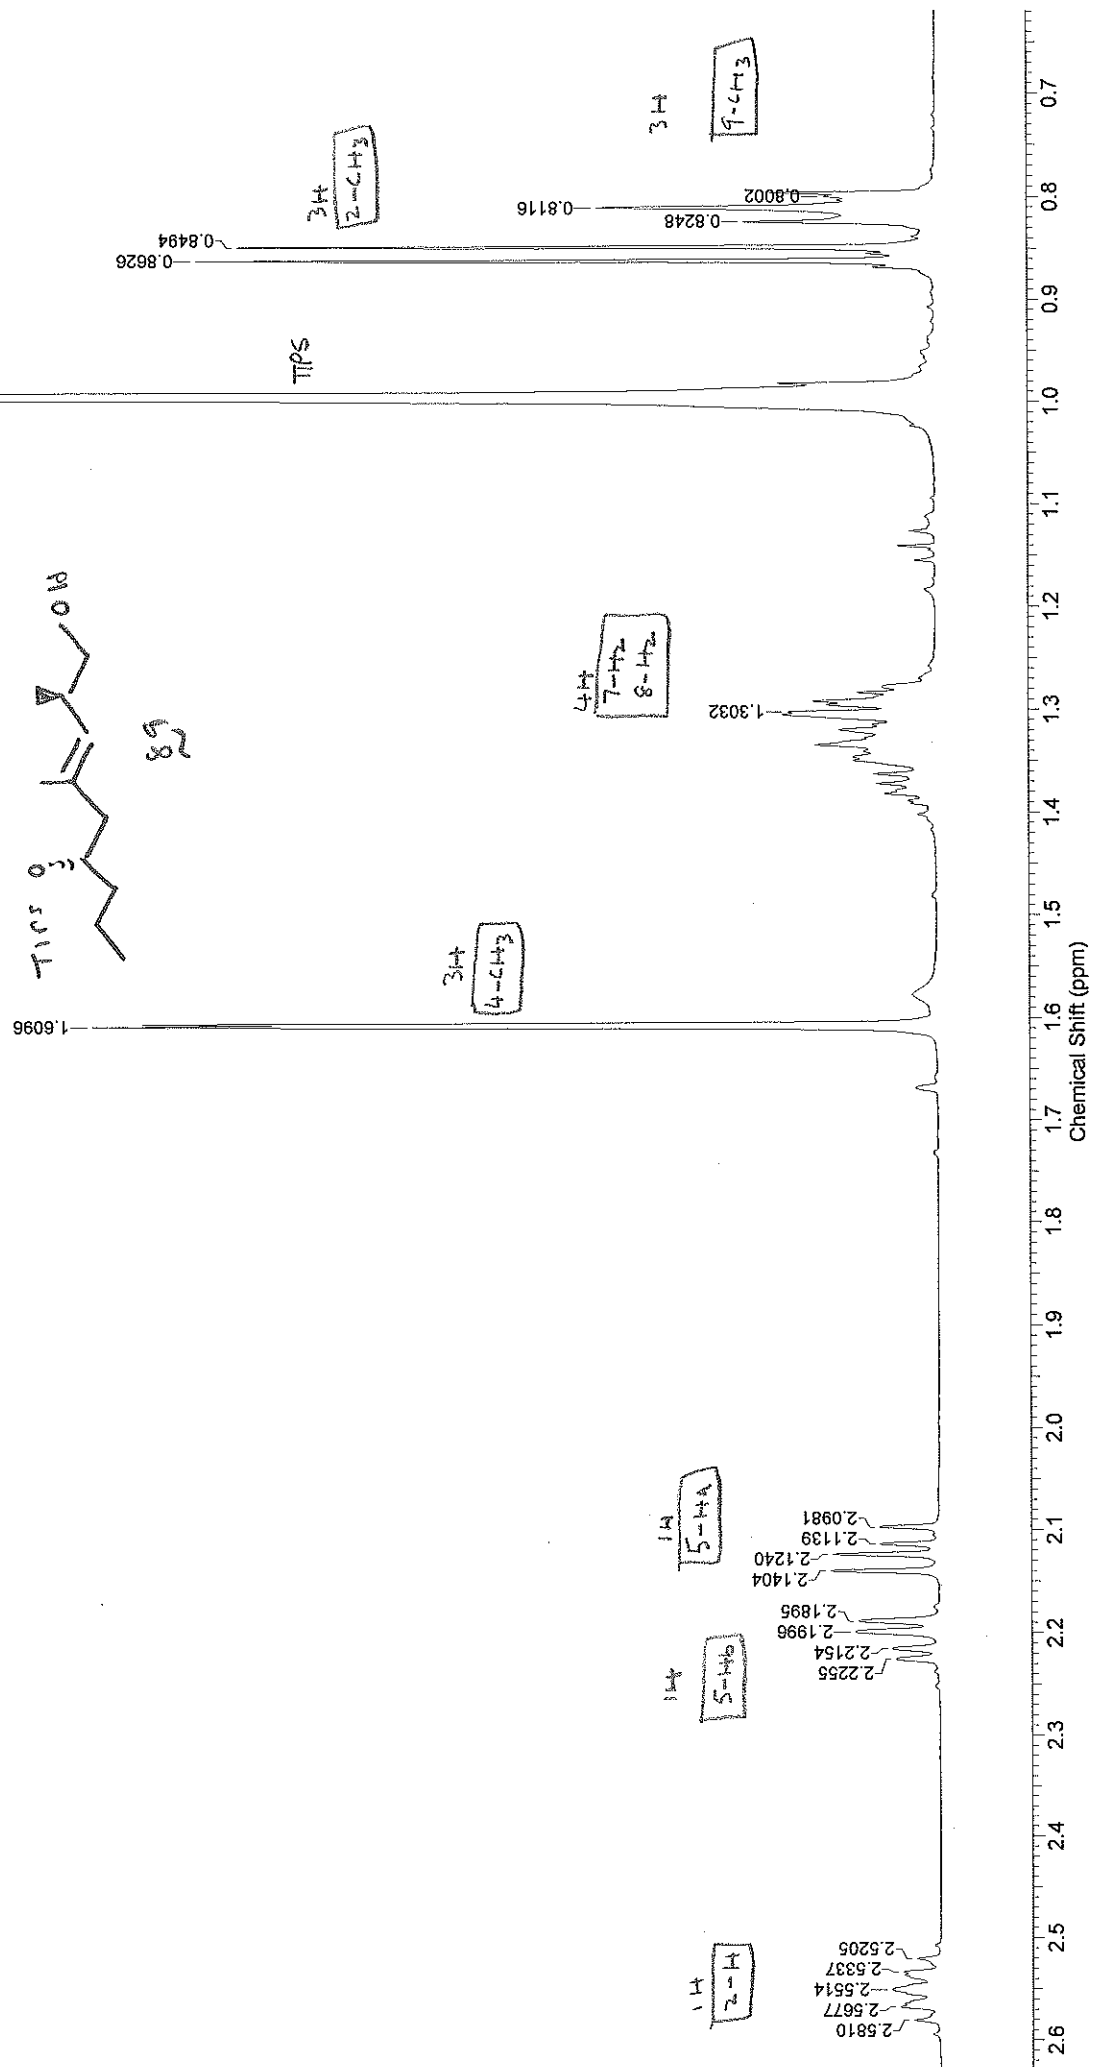

nb101  
mCARBON CDCl<sub>3</sub> /opt/topspin ejt 1

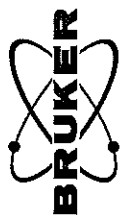

129.68  
135.21

77.31  
77.06  
76.80  
70.68  
67.89

47.63

38.51  
35.44

18.25  
17.77  
17.13  
16.95  
14.41  
12.71

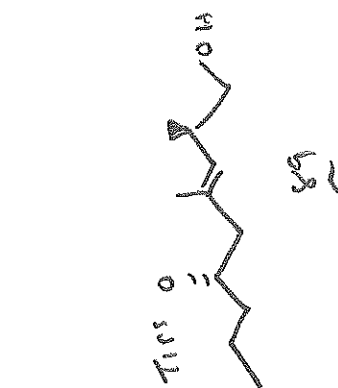

Current Data Parameters  
NAME 2007-07-05-ejt-1  
EXPNO 20  
PROCNO 1

F2 - Acquisition Parameters  
Date\_ 20070706  
Time 10.23  
INSTRUM spect  
PROBHD 5 mm TXI 1H/D-  
PULPROG zgpg30  
TD 65536  
SOLVENT CDCl<sub>3</sub>  
NS 256  
DS 2  
SWH 29761.904 Hz  
FIDRES 0.454131 Hz  
AQ 1.1010548 sec  
RG 512  
DW 16.800 usec  
DE 6.00 usec  
TE 300.0 K  
D1 2.00000000 sec  
d11 0.03000000 sec  
DELTA 1.89999998 sec  
TD0 1

===== CHANNEL f1 =====  
NUC1 13C  
P1 11.50 usec  
PL1 -4.20 dB  
SF01 125.7703643 MHz

===== CHANNEL f2 =====  
CPDPRG2 waltz16  
NUC2 1H  
PCPD2 80.00 usec  
PL12 23.47 dB  
PL13 120.00 dB  
PL2 3.25 dB  
SF02 500.1320005 MHz

F2 - Processing parameters  
SI 32768  
SF 125.7577850 MHz  
WDW EM  
SSB 0  
LB 1.00 Hz  
GB 1.40

200 180 160 140 120 100 80 60 40 20 0 ppm





nb112 mPROTON CDCl3 /opt/topspin ejt 7

2007-08-08-EJT-7\_010000FID

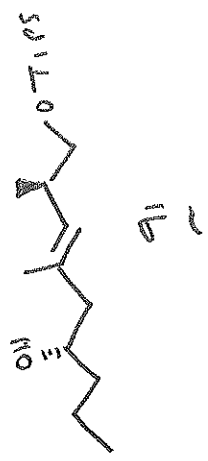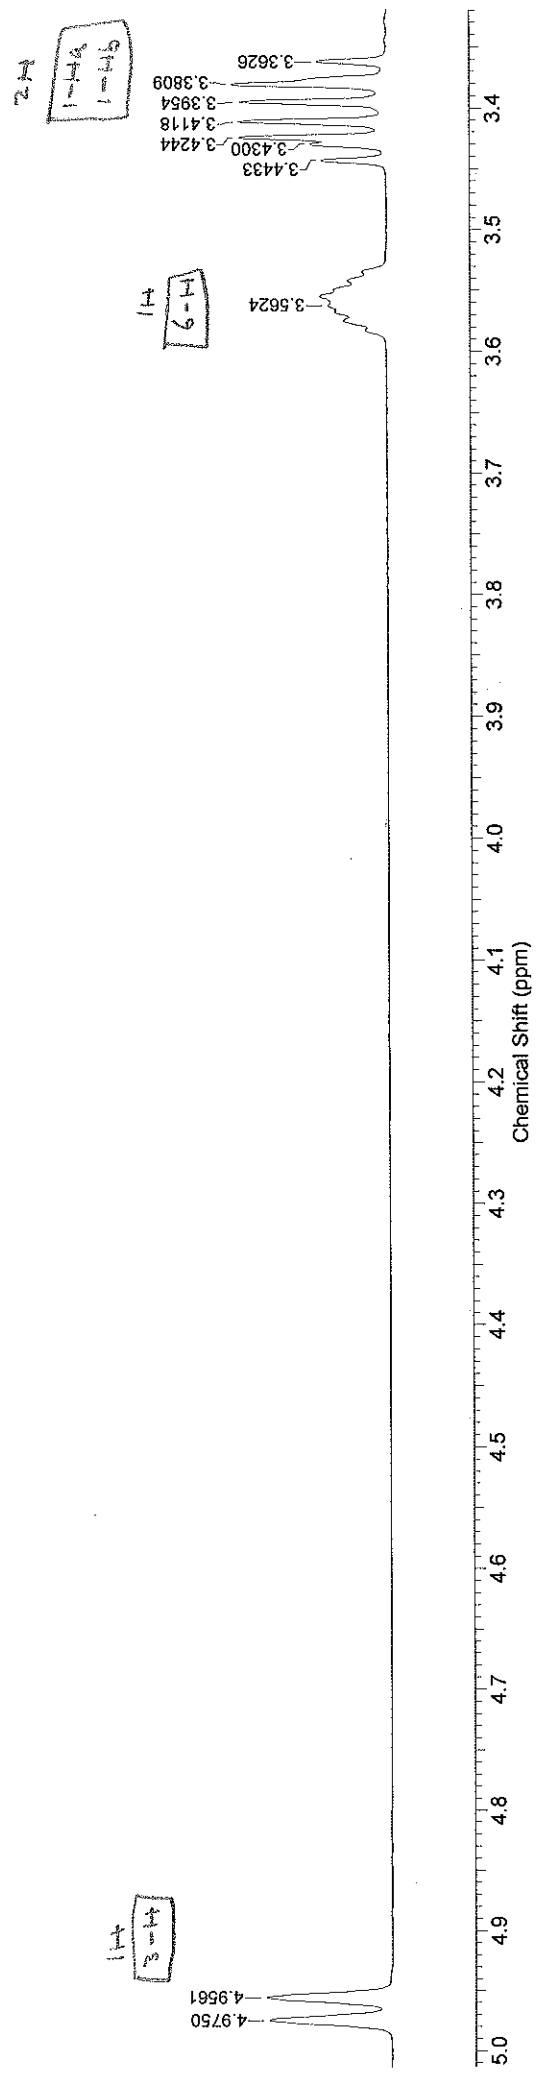

nb112 mPROTON CDCl3 /opt/topspin ejt 7

2007-08-08-EJT-7\_010000FID

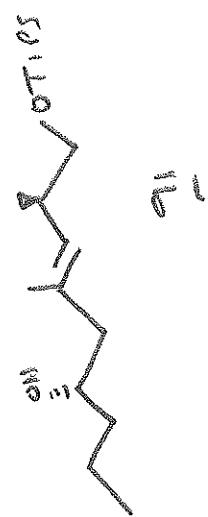

5d11

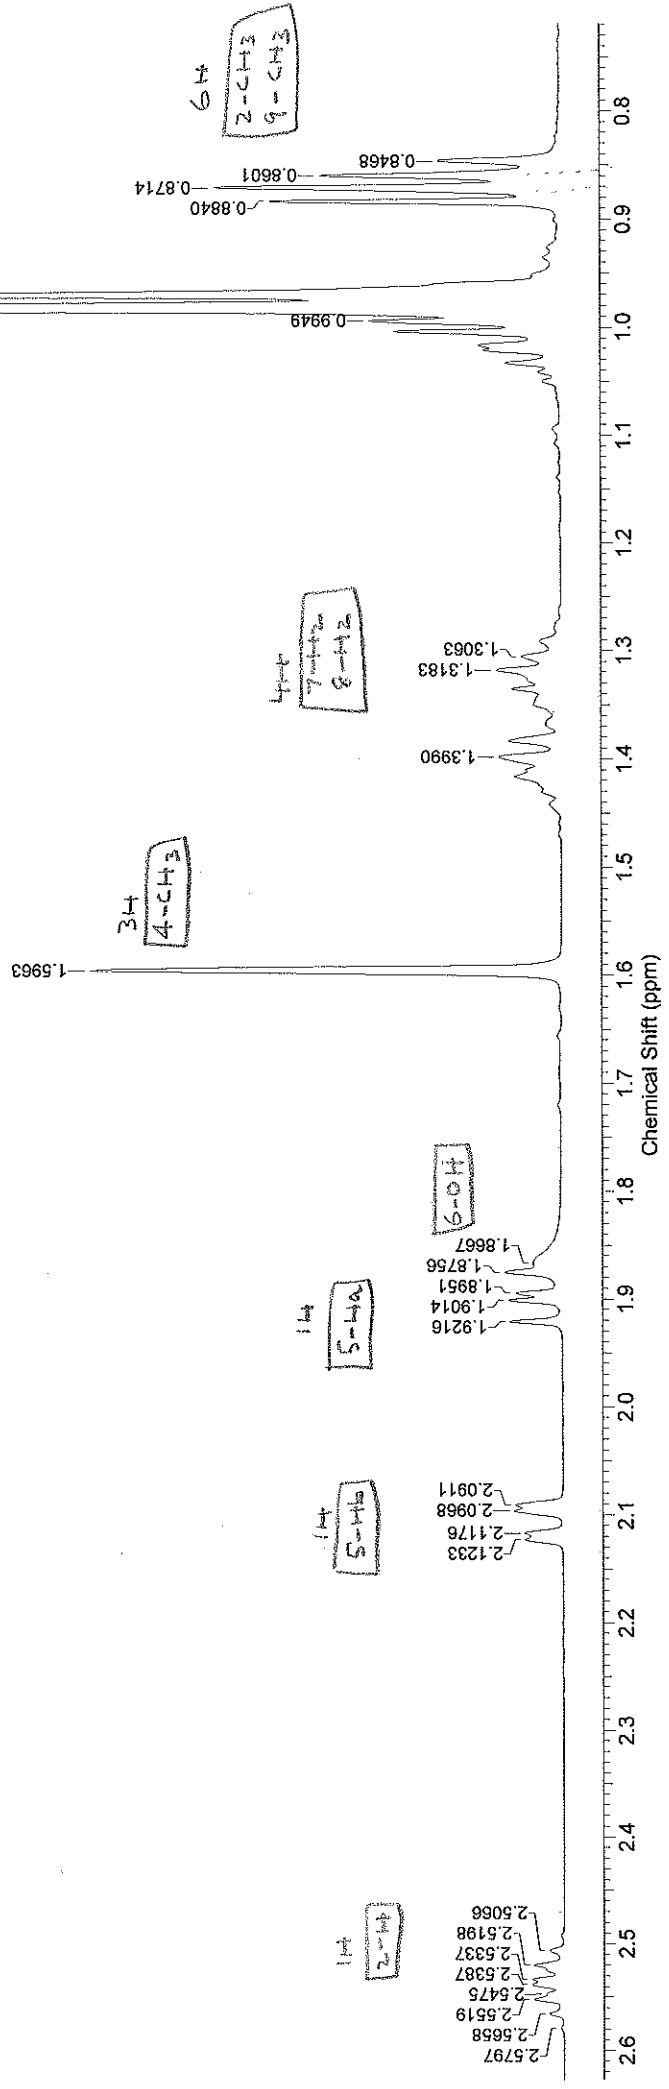

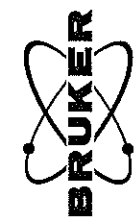

nb110  
mCARBON CDCl3 /opt/topspin vnmr1 3

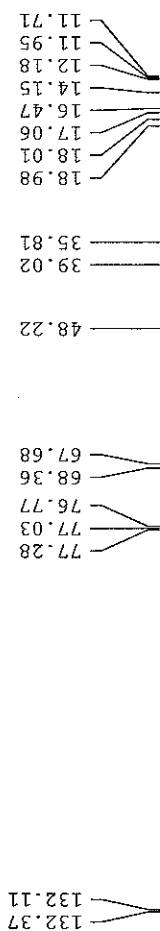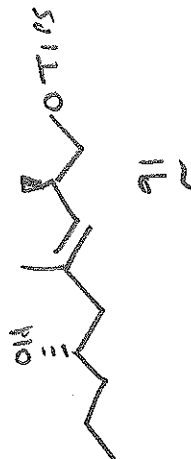

Current Data Parameters  
NAME 2007-07-23-vnmr1-3  
EXPNO 10  
PROCNO 1

F2 - Acquisition Parameters  
Date\_ 20070723  
Time 13.43  
INSTRUM spect  
PROBHD 5 mm TXI 1H/D-  
PULPROG zgpg30  
TD 65536  
SOLVENT CDCl3  
NS 256  
DS 2  
SWH 29761.904 Hz  
FIDRES 0.454131 Hz  
AQ 1.1010548 sec  
RG 512  
DW 16.800 usec  
DE 6.00 usec  
TE 300.0 K  
D1 2.00000000 sec  
d11 0.03000000 sec  
DELTA 1.89999998 sec  
TD0 1

==== CHANNEL f1 =====  
NUC1 13C  
P1 11.50 usec  
PL1 -4.20 dB  
SF01 125.7703643 MHz

==== CHANNEL f2 =====  
CPDPRG2 waltz16  
NUC2 1H  
PCPD2 80.00 usec  
PL12 23.47 dB  
PL13 120.00 dB  
PL2 3.25 dB  
SFO2 500.1320005 MHz

F2 - Processing parameters  
SI 32768  
SF 125.7577890 MHz  
WDW EM  
SSB 0  
LB 1.00 Hz  
GB 0  
PC 1.40

200 180 160 140 120 100 80 60 40 20 0 ppm

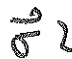

$2 = 4$   
 $4 = 4$   
 $6 = 4 \checkmark$   
 $34$

10

$$\begin{array}{r} 2-CH_3 \\ 2-CH_3 \\ 2-CH_3 \\ \hline 9H \end{array}$$


```
Current Data Parameters
NAME      2007-08-03-ejt-21
EXPNO     10
PROCNO    1

===== CHANNEL f1 =====
1H
7.80 usec
3.25 dB
500.1330885 MHz

===== Processing parameters =====
SI          .32768
FF          500.1300405 MHz
WDW         EM
SSB         0
GB          0.30 Hz
EC          1.00
```

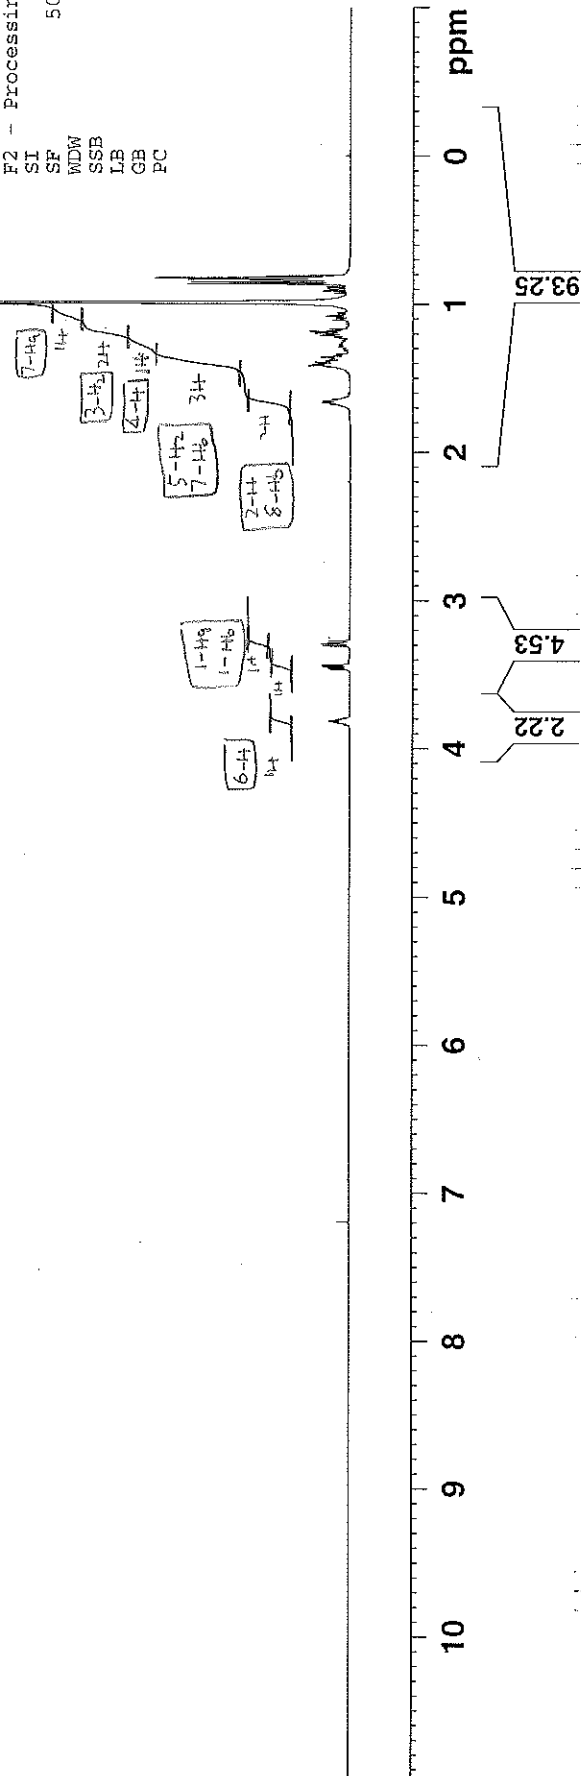

3.8419  
3.8338  
3.8262  
3.8186  
3.8111  
3.8035  
3.7953

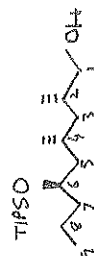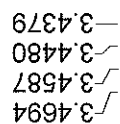

—3.3099  
—3.2967  
—3.2891  
—3.2753

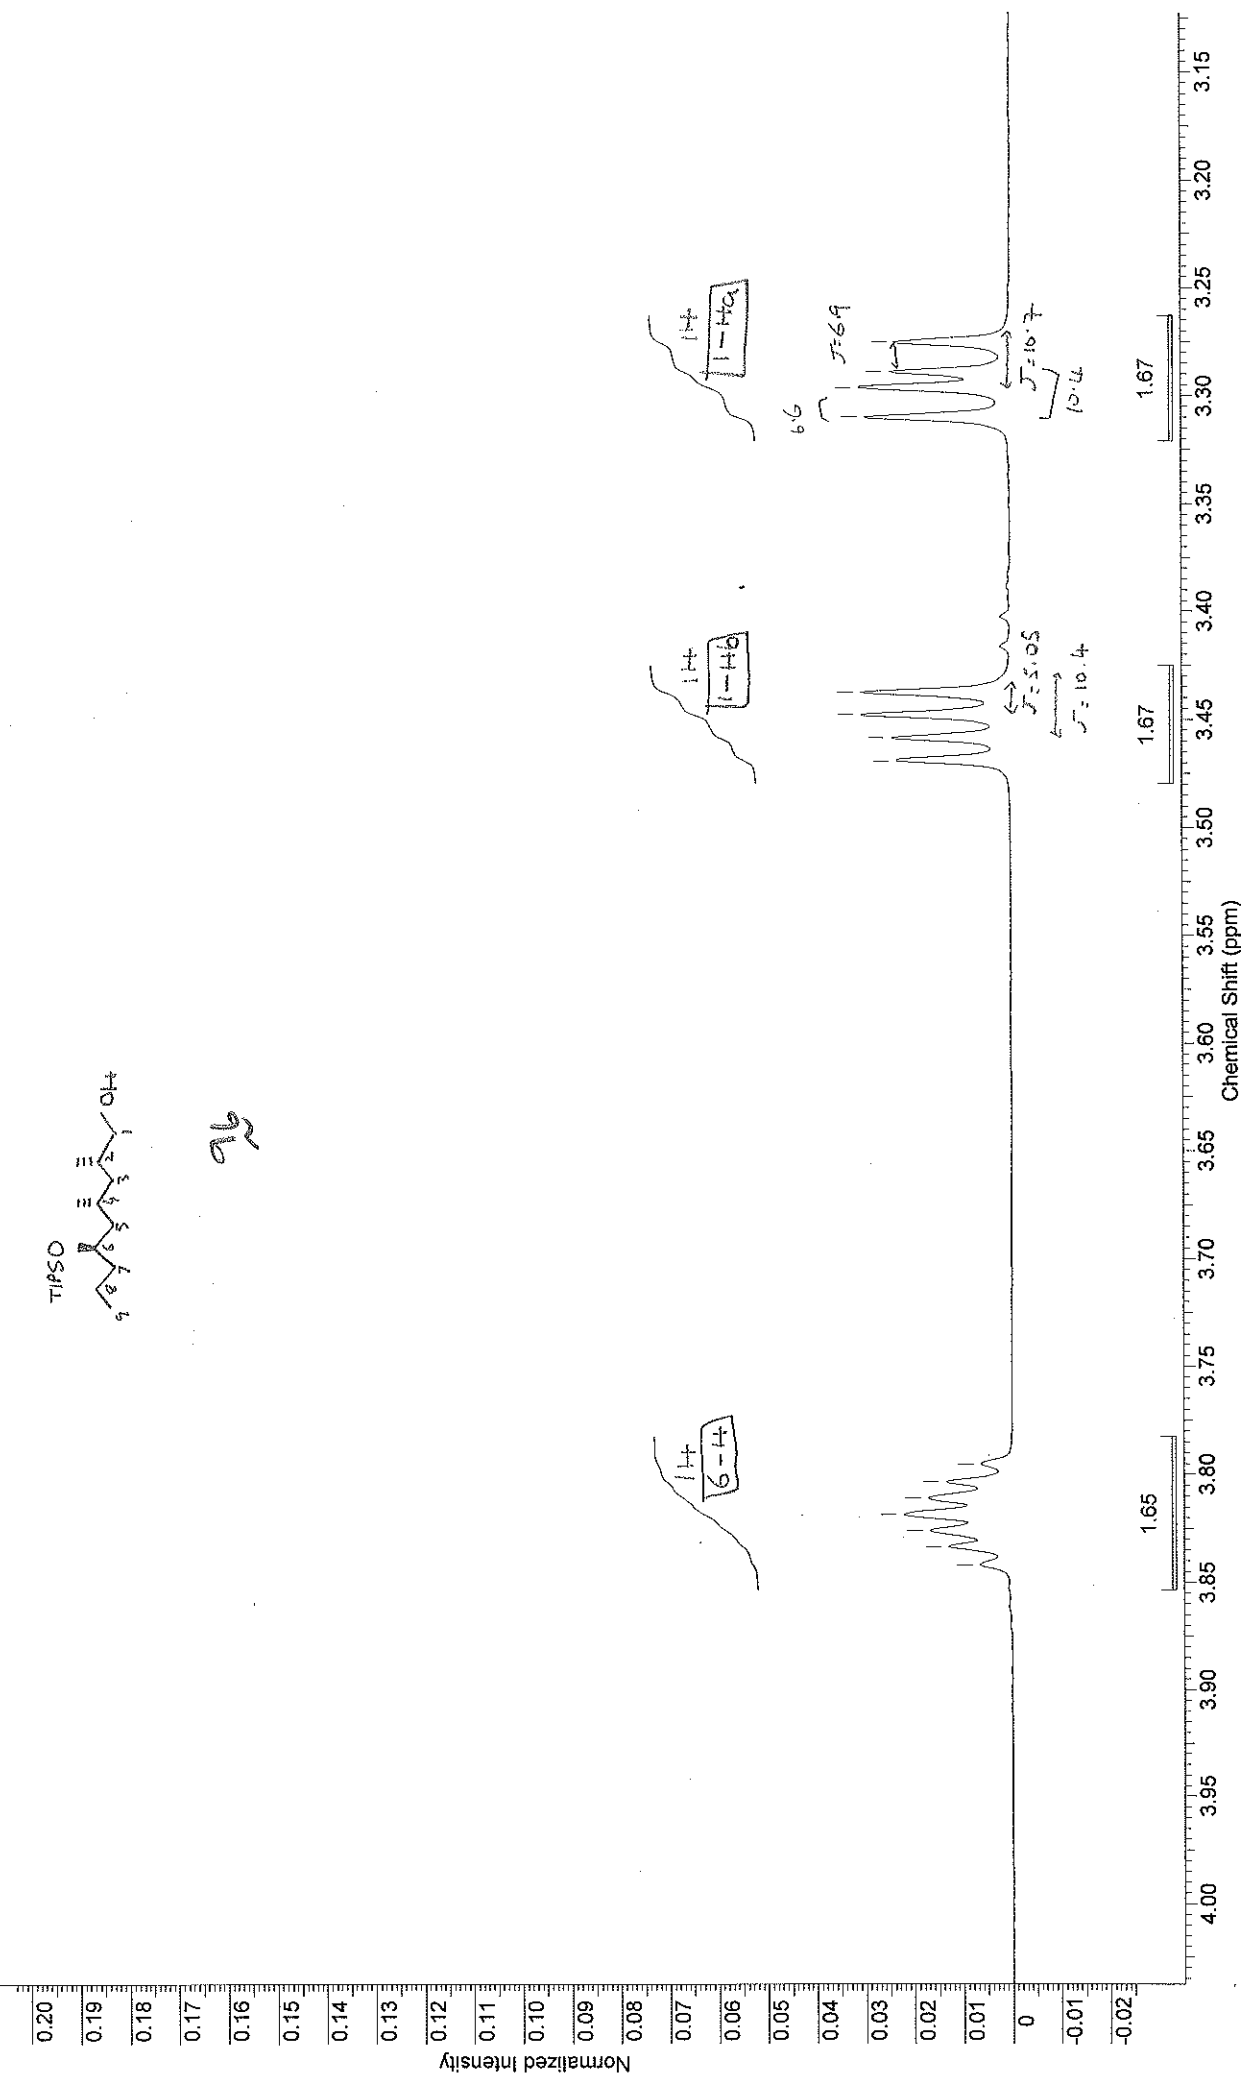

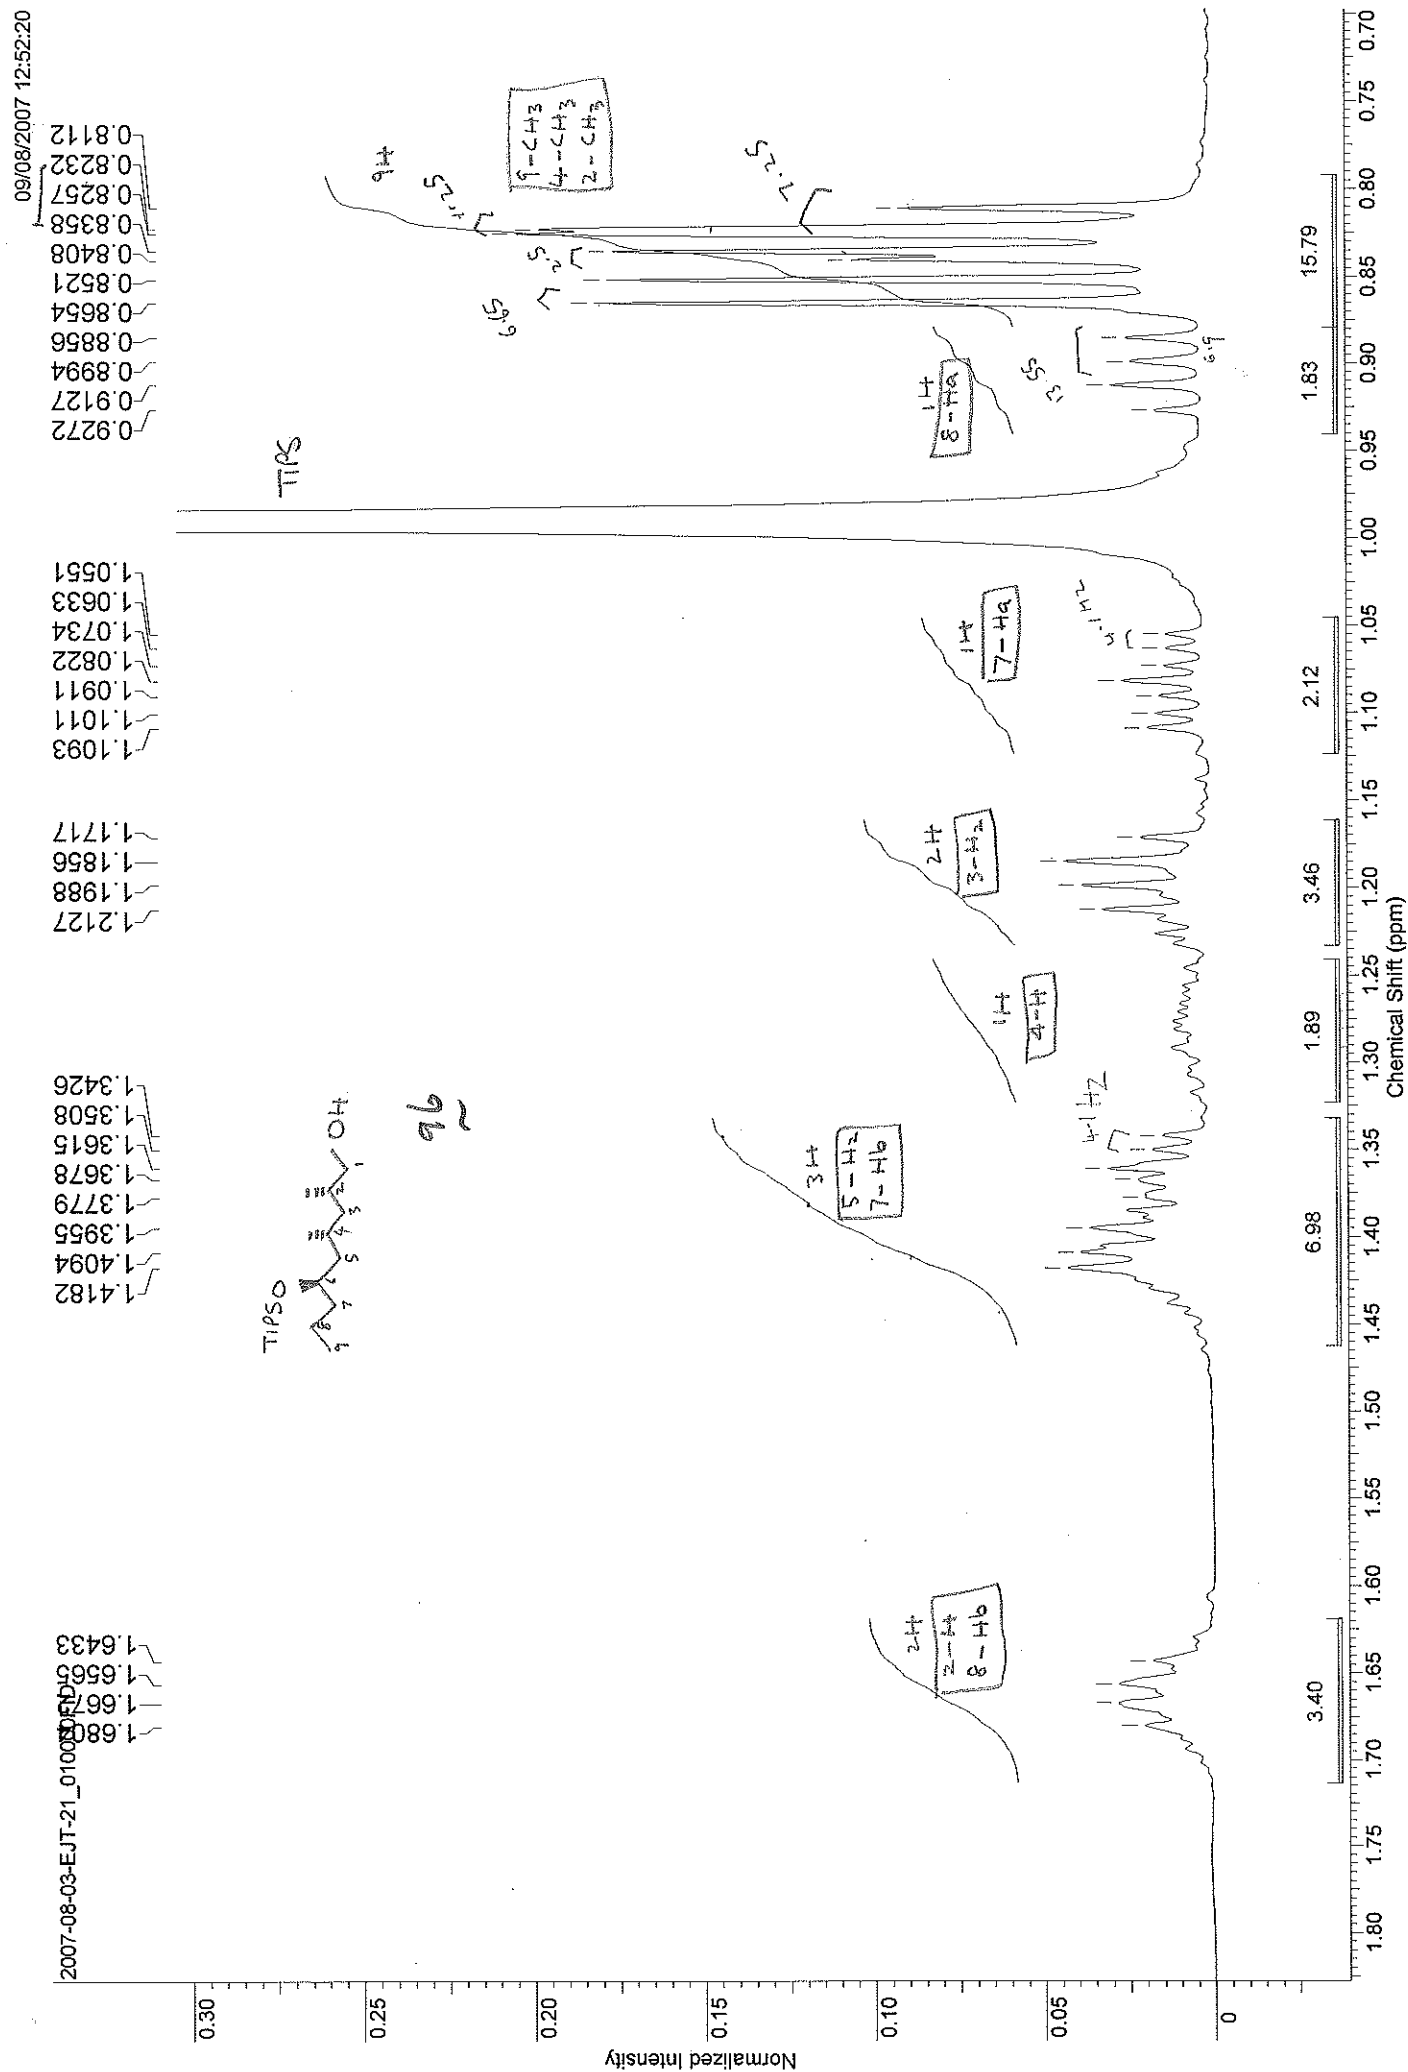

nb115  
mCARBON CDCl3 /opt/topspin ejt 21

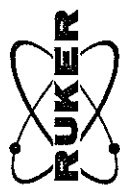

44.24  
41.76  
40.34  
33.04  
30.30  
29.70  
27.00  
26.44  
20.73  
20.56  
18.27  
18.24  
18.08  
17.72  
17.39  
14.52  
14.37  
13.12  
12.89  
12.76  
12.71  
12.65  
12.36

Current Data Parameters  
NAME 2007-08-03-ejt-21  
EXPNO 22  
PROCNO 1

F2 - Acquisition Parameters  
Date\_ 20070804  
Time 7.55  
INSTRUM spect  
PROBHD 5 mm TXI 1H/D-  
PULPROG zgpg30  
TD 65536  
SOLVENT CDCl3  
NS 256  
DS 2  
SMH 29761.904 Hz  
FIDRES 0.454131 Hz  
AQ 1.1010548 sec  
RG 512  
DW 16.800 usec  
DE 6.00 usec  
TE 300.0 K  
D1 2.00000000 sec  
d11 0.03000000 sec  
DELTA 1.89999998 sec  
TD0 1

===== CHANNEL f1 =====  
NUC1 13C  
P1 11.50 usec  
PL1 -4.20 dB  
SFO1 125.7703643 MHz

===== CHANNEL f2 =====  
CPDPRG2 waltz16  
NUC2 1H  
PCPD2 80.00 usec  
PL12 20.00 dB  
PL13 23.00 dB  
PL2 3.25 dB  
SFO2 500.1320005 MHz

F2 - Processing parameters  
SI 32768  
SF 125.7577890 MHz  
WDW EM  
SSB 0  
LB 1.00 Hz  
GB 0  
PC 1.40

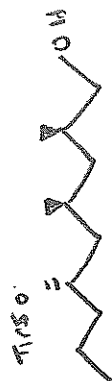

96

200 180 160 140 120 100 80 60 40 20 0 ppm





09/08/2007 12:54:27

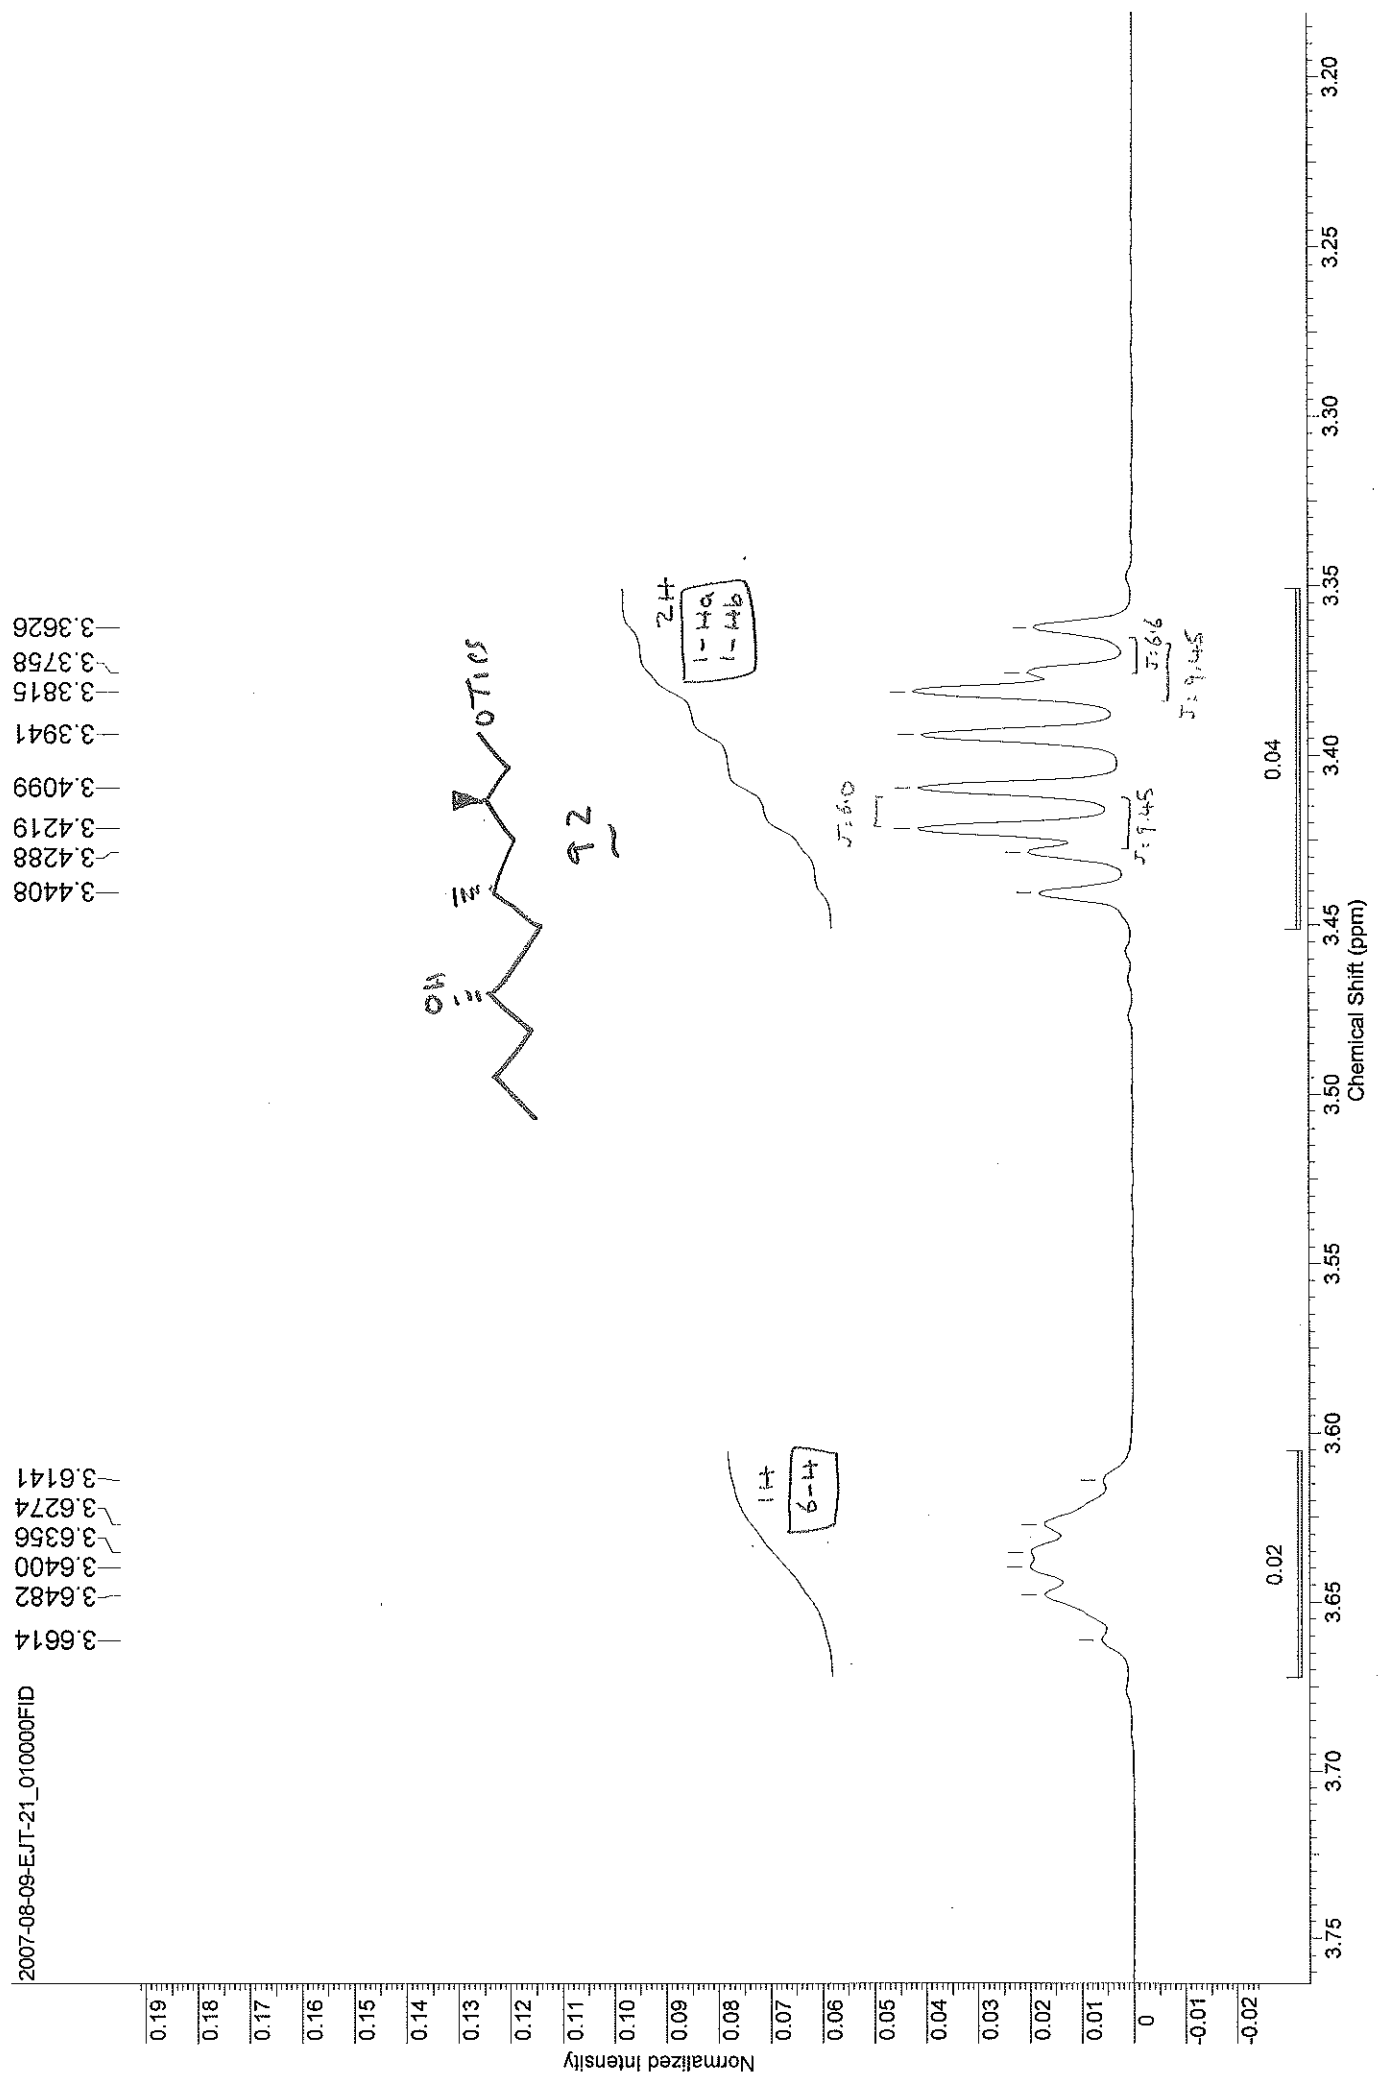

09/08/2007 12:57:20

2007-08-09-EJT-21\_010000FID

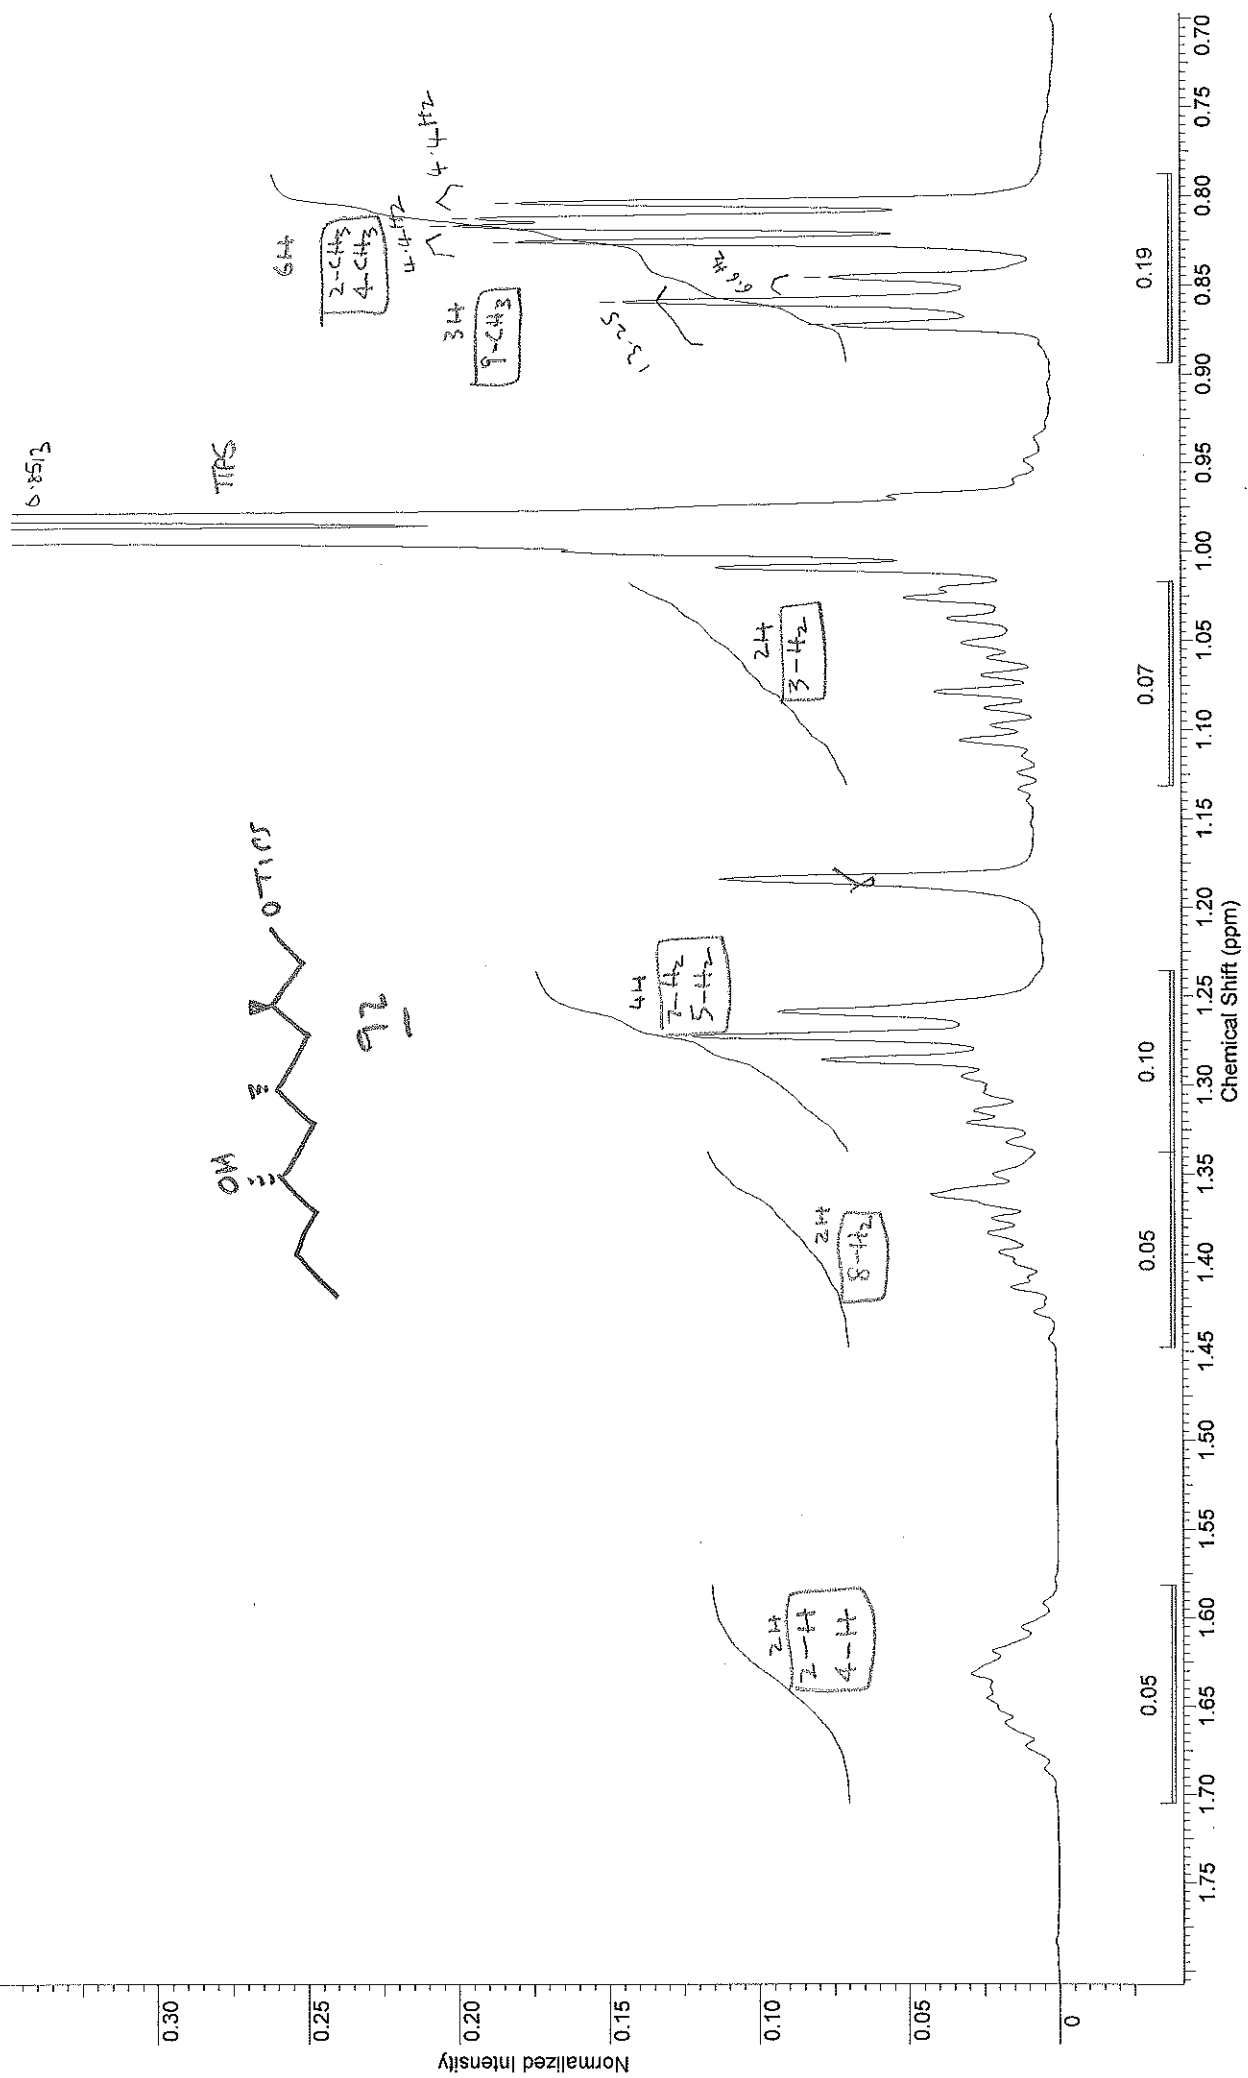

nb122 -B  
mCARBON CDCl<sub>3</sub> /opt/topspin ejt 42

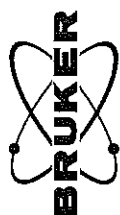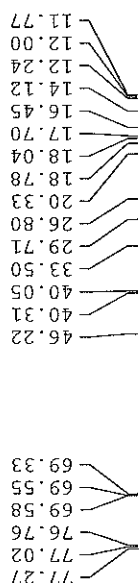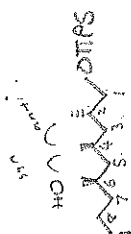

92

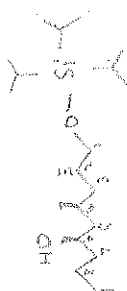

Current Data Parameters  
NAME 2007-08-09-ejt-42  
EXPNO 10  
PROCNO 1

F2 - Acquisition Parameters  
Date\_ 20070809  
Time 13.08  
INSTRUM spect  
PROBHD 5 mm TXI 1H/D-  
PULPROG zgpg30  
TD 65536  
SOLVENT CDCl<sub>3</sub>  
NS 256  
DS 2  
SWH 29761.904 Hz  
FIDRES 0.454131 Hz  
AQ 1.1010548 sec  
RG 512  
DW 16.800 usec  
DE 6.00 usec  
TE 300.0 K  
D1 2.00000000 sec  
d11 0.03000000 sec  
DELTA 1.89999998 sec  
TD0 1

===== CHANNEL f1 =====  
NUC1 13C  
P1 11.50 usec  
PL1 -4.20 dB  
SFO1 125.7703643 MHz

===== CHANNEL f2 =====  
CPDPRG2 waltz16  
NUC2 1H  
PCPD2 80.00 usec  
PL2 20.00 dB  
PL3 23.00 dB  
PL2 3.25 dB  
SFO2 500.1320005 MHz

F2 - Processing parameters  
SI 32768  
SF 125.7577890 MHz  
WDW EM  
SSB 0  
LB 1.00 Hz  
GB 0  
PC 1.40

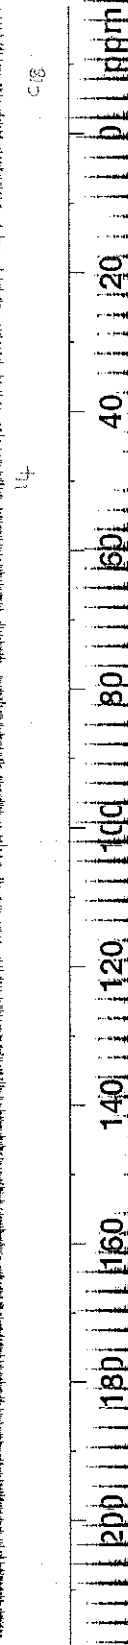



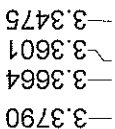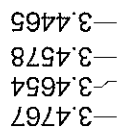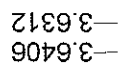

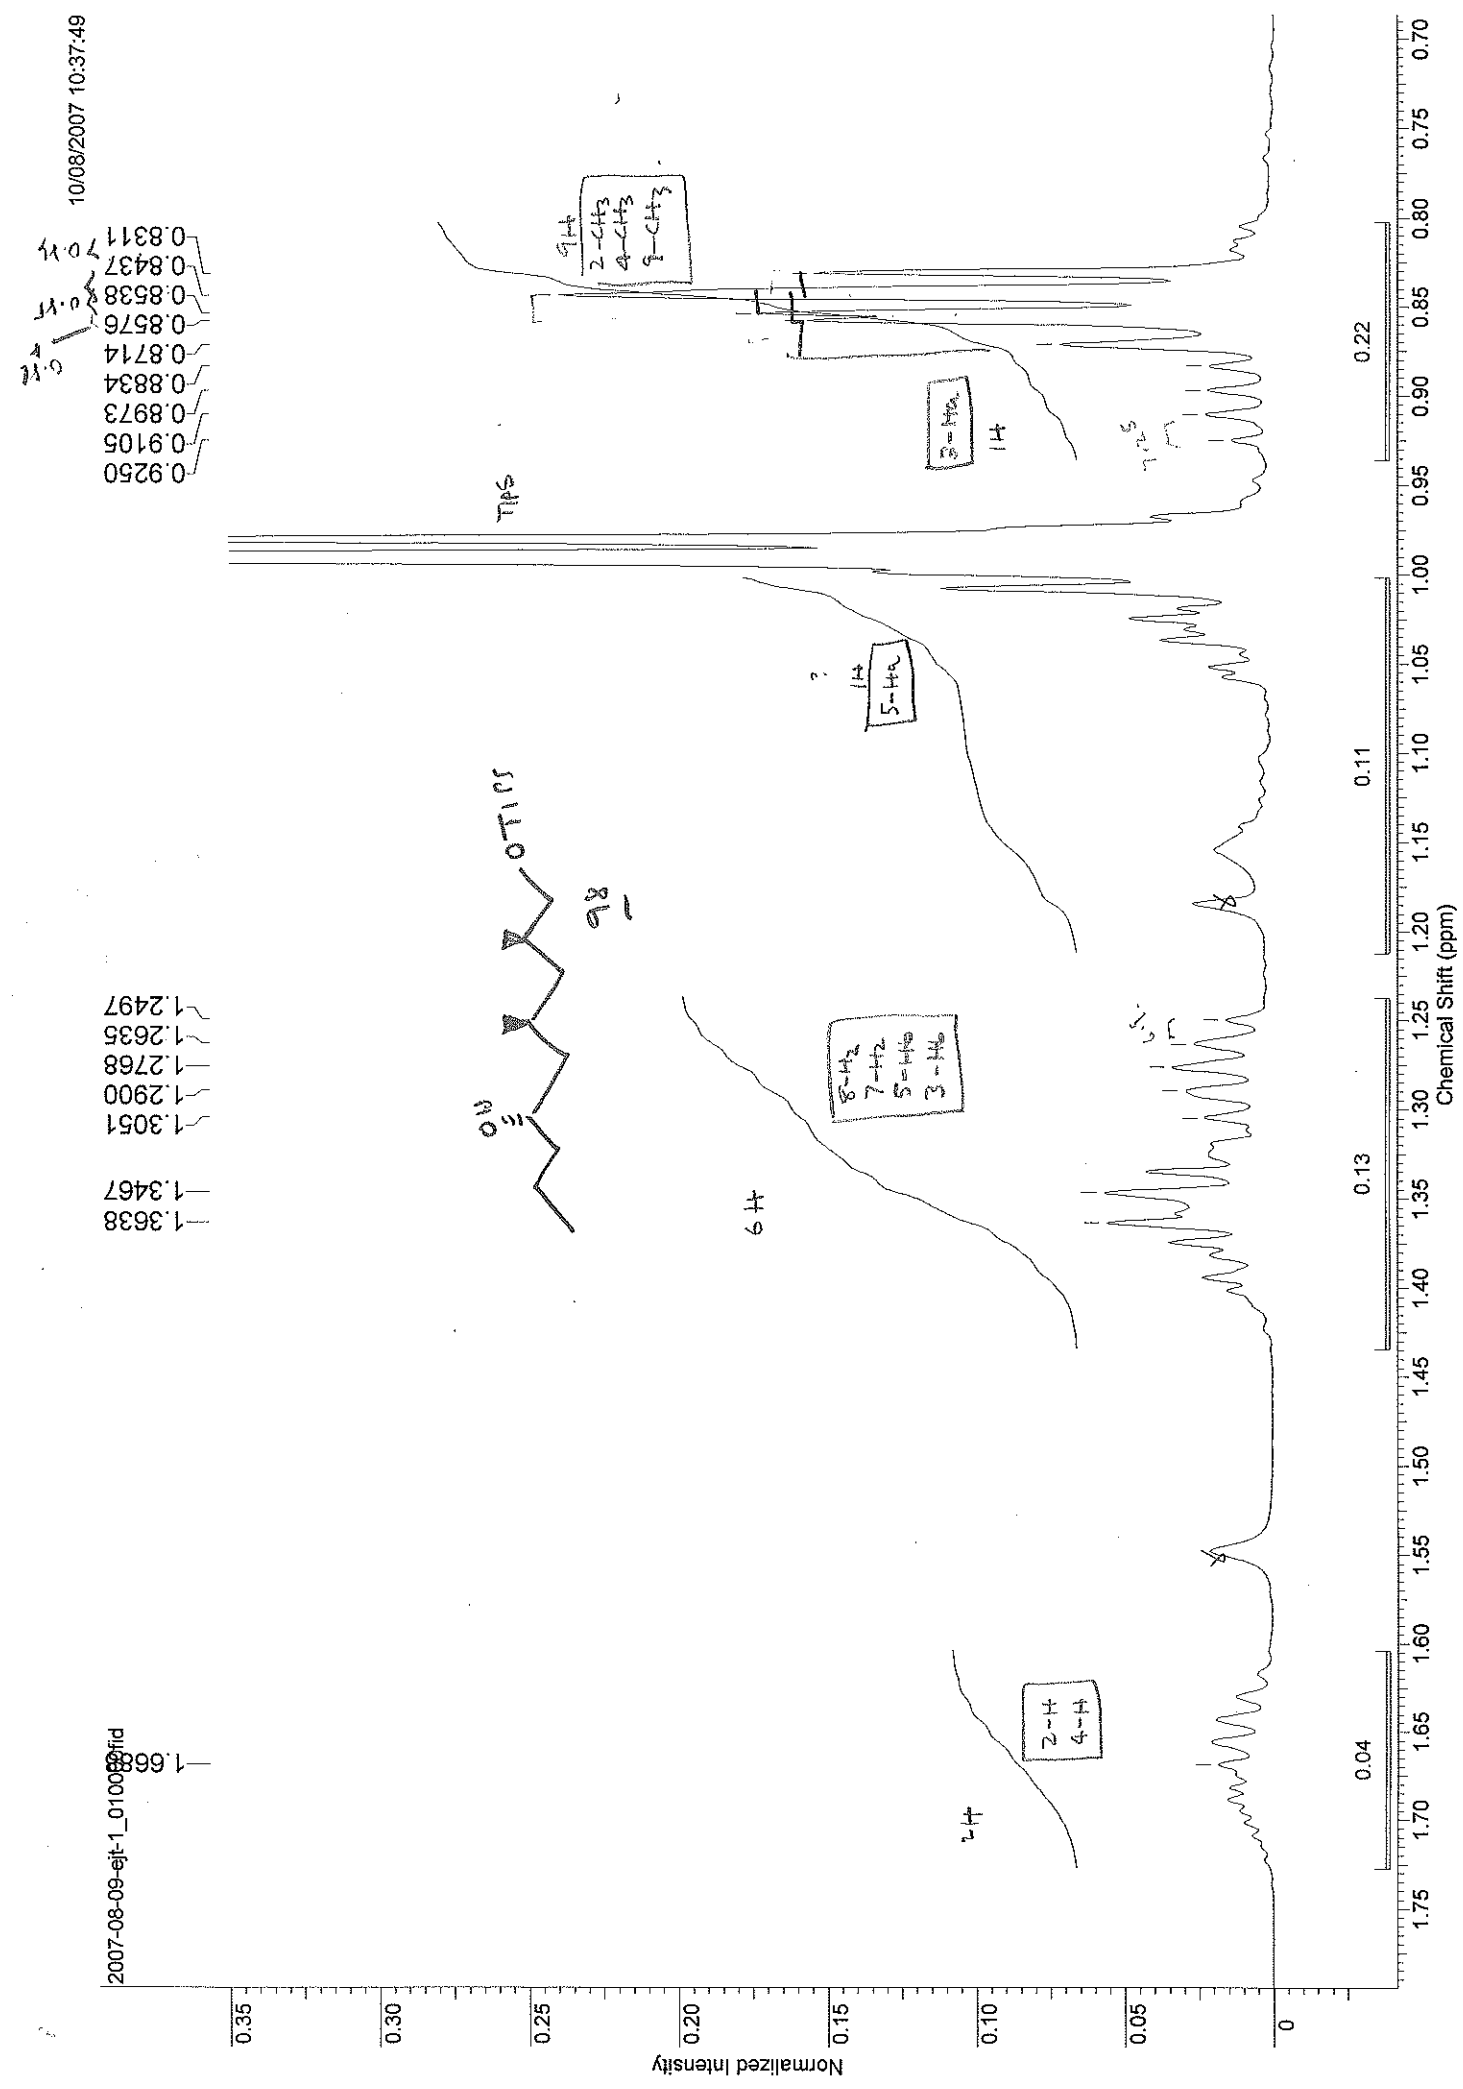



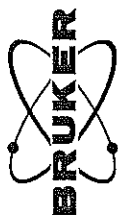

|                     | 1970   | 1980   | 1990   | 2000   |
|---------------------|--------|--------|--------|--------|
| 1. Total population | 117.27 | 177.02 | 276.76 | 369.34 |
| 2. Male             | 58.66  | 89.34  | 138.66 | 198.66 |
| 3. Female           | 58.61  | 87.68  | 138.10 | 170.68 |
| 4. Urban population | 44.78  | 71.90  | 104.64 | 133.33 |
| 5. Male             | 20.20  | 33.33  | 48.63  | 63.26  |
| 6. Female           | 24.58  | 38.57  | 56.00  | 70.43  |
| 7. Rural population | 72.49  | 105.12 | 172.10 | 236.00 |
| 8. Male             | 38.00  | 58.00  | 89.90  | 135.00 |
| 9. Female           | 34.49  | 47.12  | 82.20  | 101.00 |

|                         |                   |
|-------------------------|-------------------|
| Current Data Parameters | 2007-08-10-ejt-46 |
| NAME                    |                   |
| EXPNO                   | 20                |
| PROCNO                  | 1                 |

| F2 - Acquisition Parameters |                |
|-----------------------------|----------------|
| Date_                       | 20070812       |
| Time                        | 6.36           |
| INSTRUM                     | spect          |
| PROBHD                      | 5 mm TXI 1H/D- |
| PULPROG                     | zgpg30         |
| TD                          | 65536          |
| SOLVENT                     | CDCl3          |
| NS                          | 256            |
| DS                          | 2              |
| SWH                         | 29761.904 Hz   |
| F2FREQS                     | 0.454131 Hz    |
| AQ                          | 1.1010548 sec  |
| RG                          | 512            |
| OR                          | 16.800 usec    |
| DE                          | 6.00 usec      |
| TE                          | 300.0 K        |
| DT                          | 2.0000000 sec  |
| al1                         | 0.0300000 sec  |
| DELTA                       | 1.89999998 sec |
| TD0                         | 1              |

```
===== CHANNEL f1 =====
NUC1      13C
P1        11.50 usec
PL1       -4.20 dB
SF01      125.7703643 MHz
```

```
===== CHANNEL f2 =====
CPDRG2      waltz16
NUC2        1H
            80.00 usec
            20.00 dB
            23.00 dB
            3.25 dB
            500.132000 MHz
```

|                            |                 |
|----------------------------|-----------------|
| F2 - Processing parameters |                 |
| SI                         | 32768           |
| SSF                        | 125.7577890 MHz |
| WDW                        | EM              |
| SSB                        | 0               |
| LB                         | 1.00 Hz         |
| GB                         | 0               |
| PC                         | 1.40            |

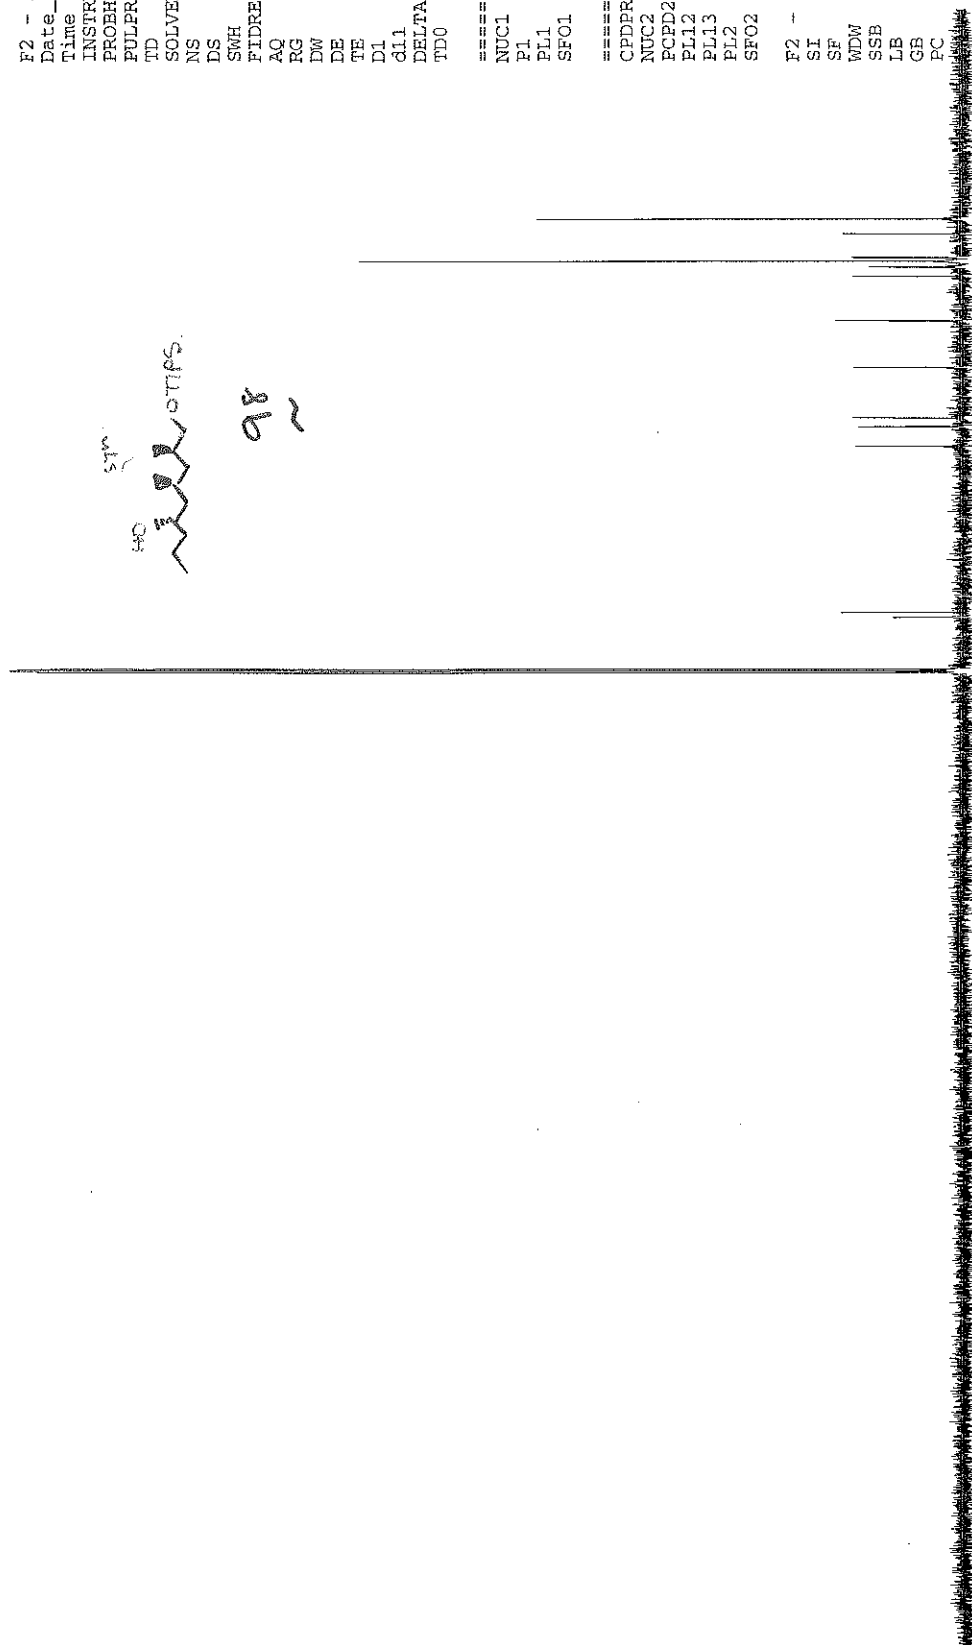

| $\alpha$ | $f(x)$ |
|----------|--------|
| 0        | 0      |
| 20       | 18     |
| 40       | 10     |
| 60       | 12     |
| 80       | 11     |
| 100      | 10     |
| 120      | 10     |
| 140      | 10     |
| 160      | 10     |
| 180      | 10     |
| 200      | 10     |



nb220  
mPROTON CDCI3 {C:\bruk400data\2008\Feb} ejt 27

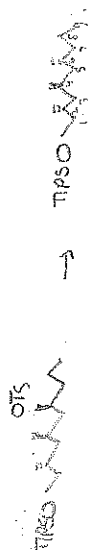

TIPS

94

C21H46OS  
FW = 342.33

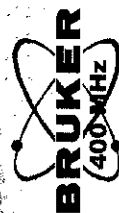

NAME 2008-02-29-ejt-27  
EXPNO 10  
PROCNO 1  
Date\_ 20080229  
Time 14.17  
INSTRUM AV400  
PROBHD 5 mm PABBO BB-  
PULPROG zg30b  
TD 65536  
SOLVENT CDCI3  
NS 16  
DS 0  
SWH 8264.463 Hz  
FIDRES 0.126106 Hz  
AQ 3.9649780 sec  
RG 101  
DW 60.500 usec  
DE 9.40 usec  
TE 294.0 K  
D1 1.00000000 sec  
TD0 1

===== CHANNEL f1 =====  
NUC1 1H  
P1 10.00 usec  
PL1 -3.60 dB  
PL1W 17.83863831 W  
SFO1 400.1324710 MHz  
SI 32768  
SF 400.1300338 MHz  
WDW EM  
SSB 0  
LB 0.30 Hz  
GB 0  
PC 1.00

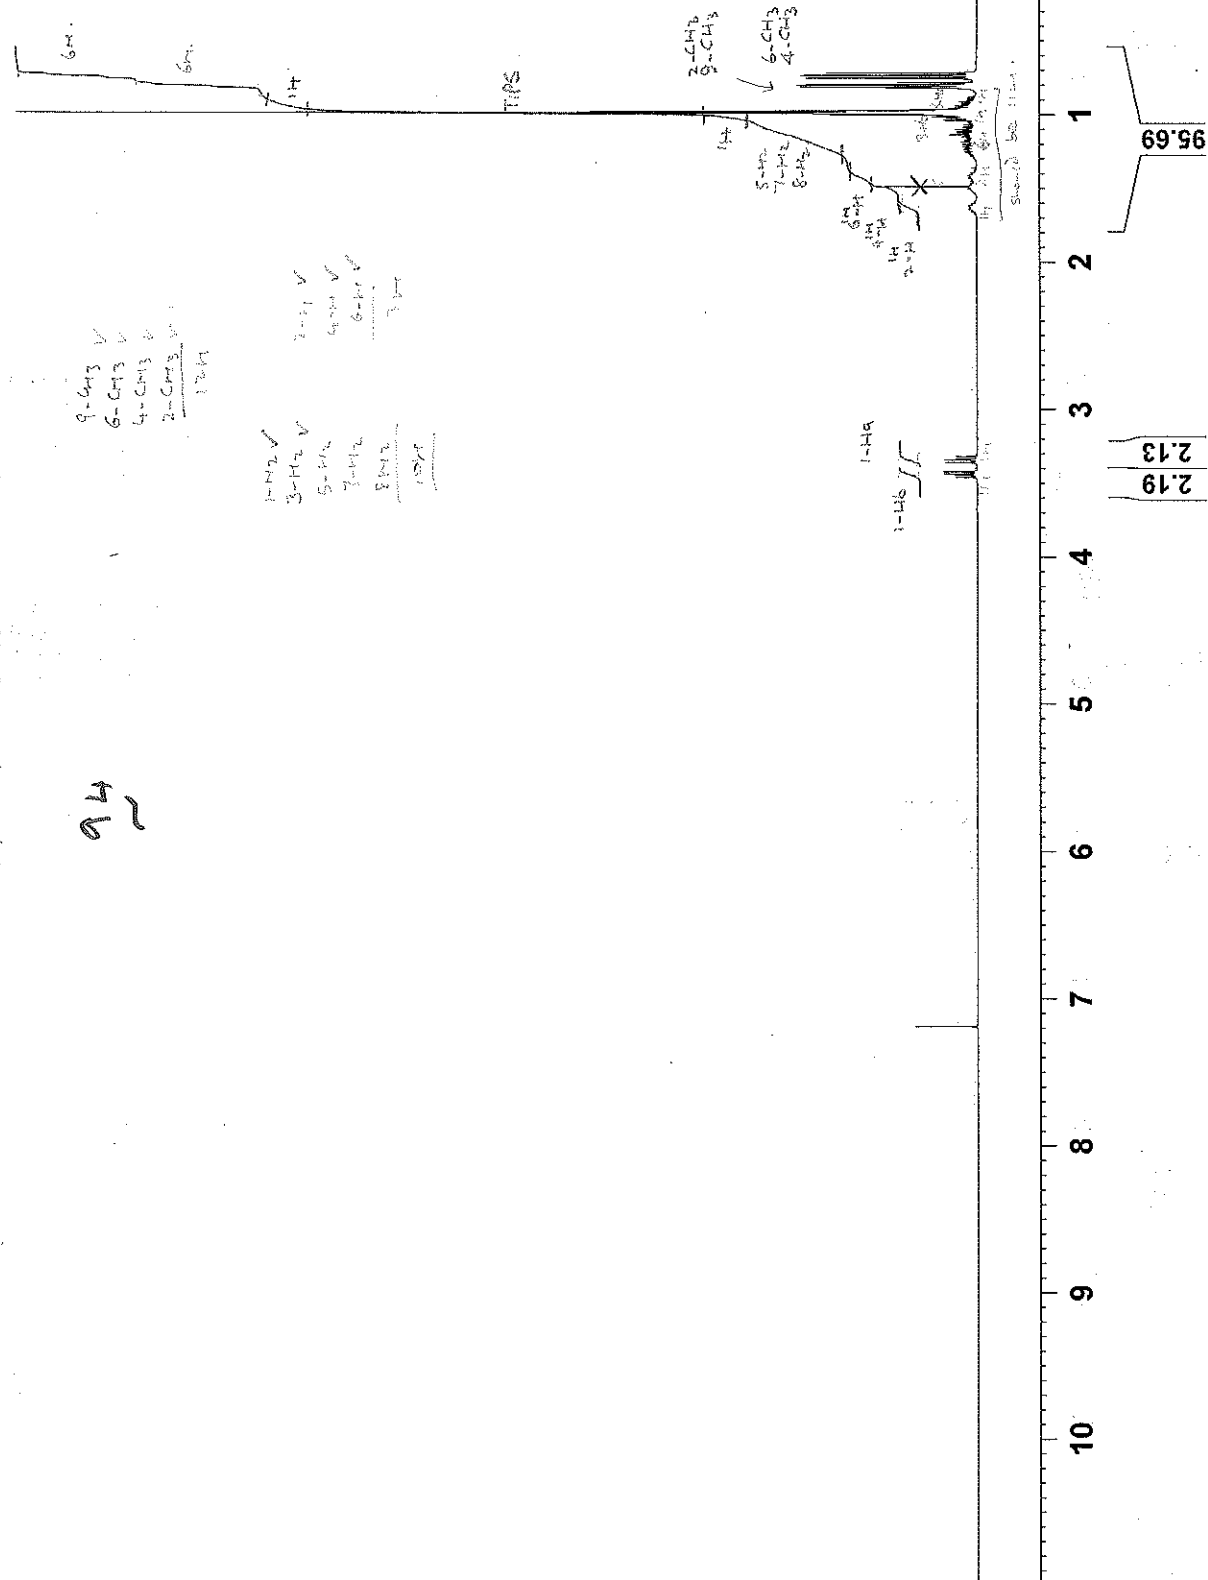

nb220 mPROTON CDCl3 {C:\bruk400data\2008\Feb\} ejt 27

2008-02-29-ejt-27\_010000fid

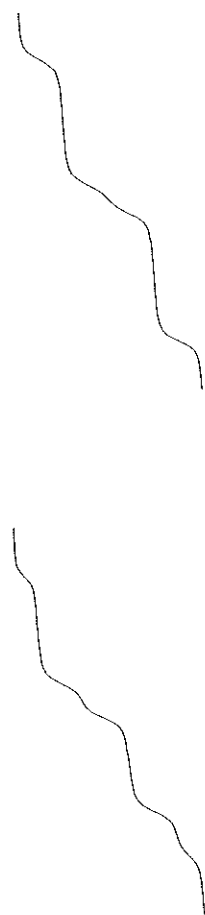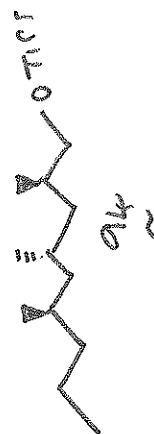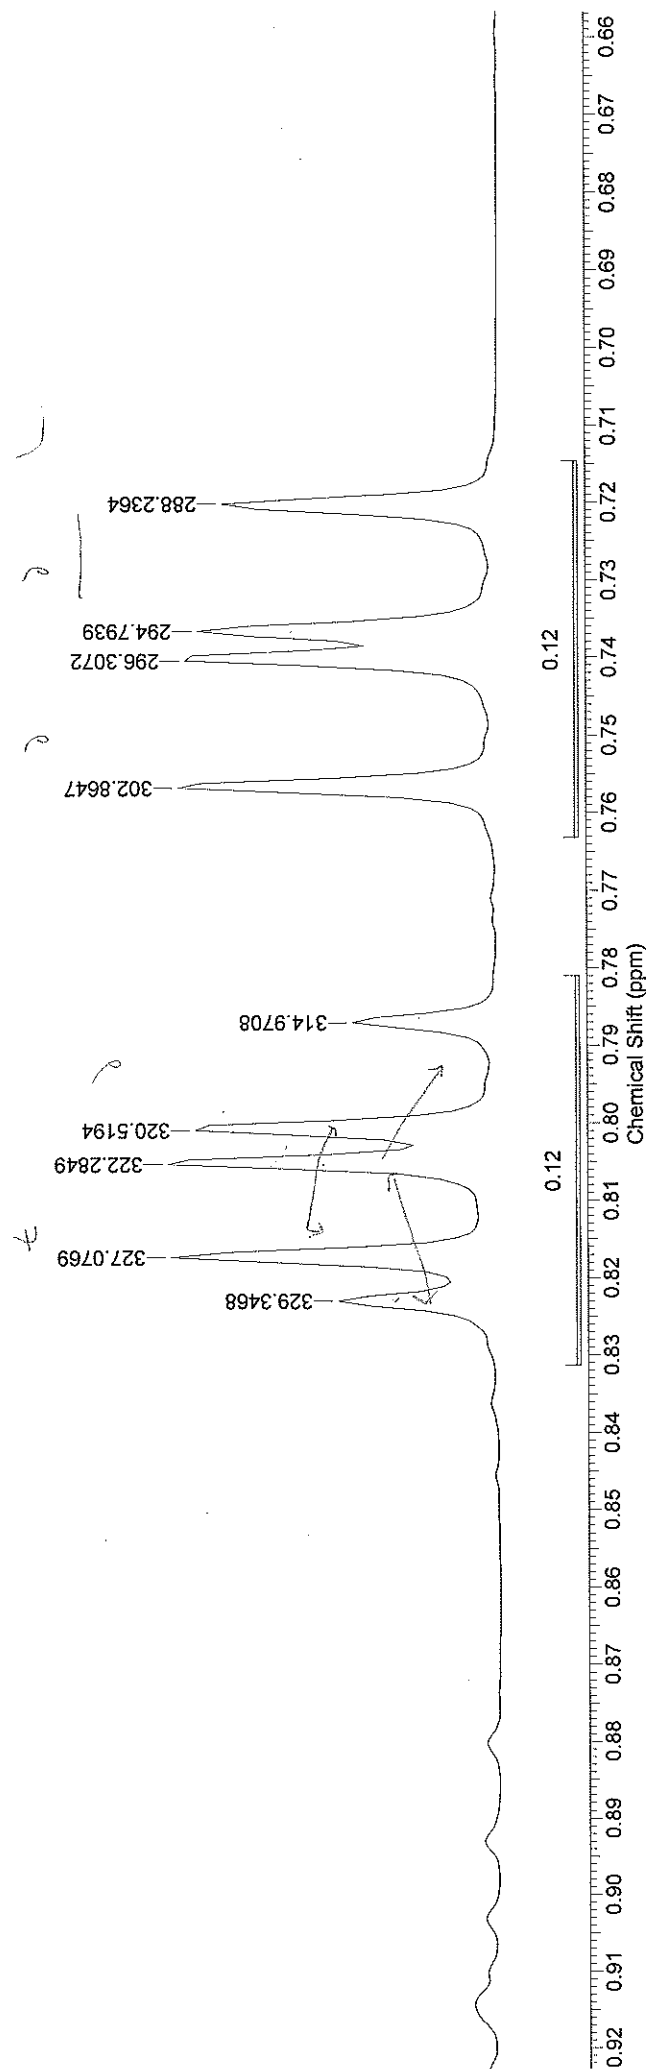

2008-02-29-ejt-27\_010000f1d

2008-02-29-ejt-27\_010000f1d

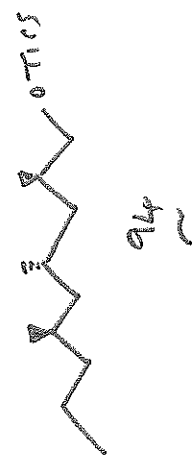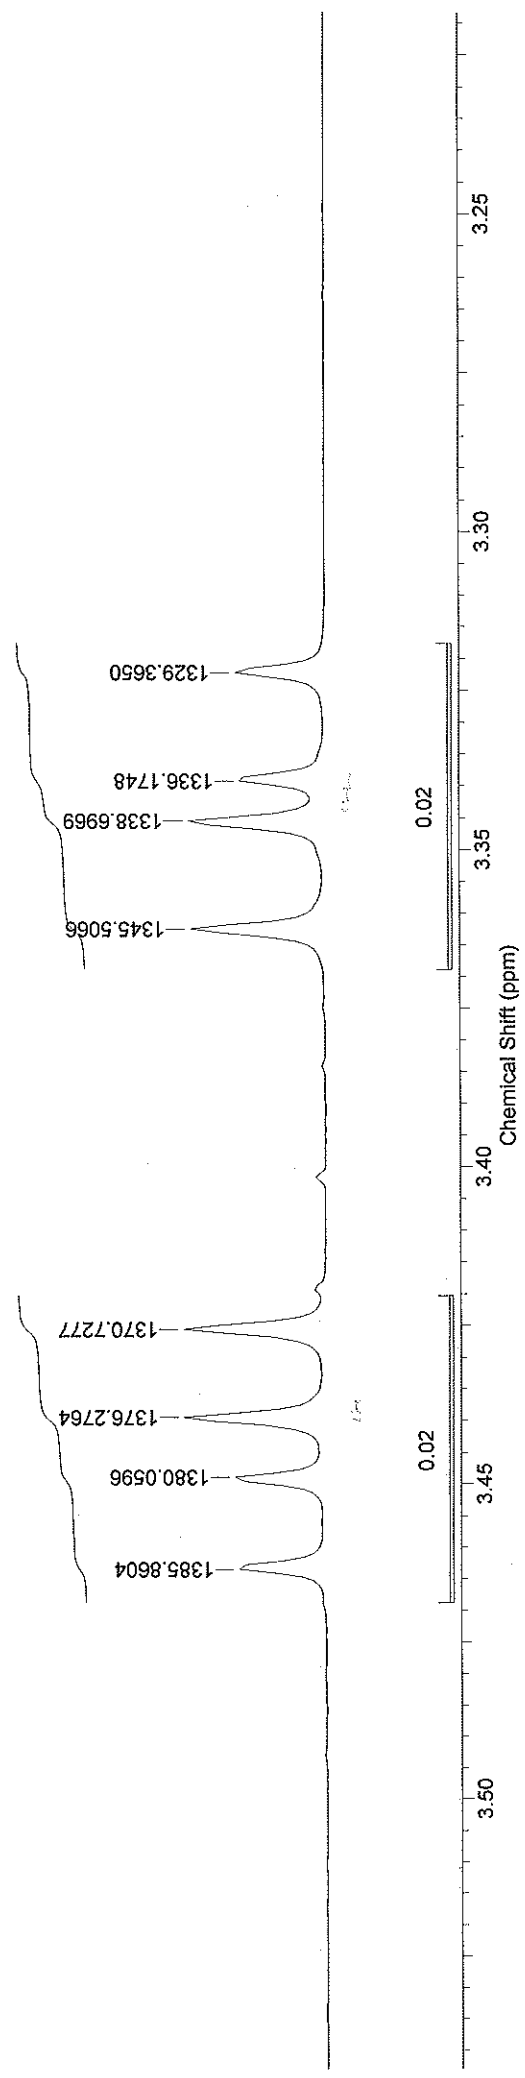

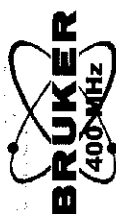

nb220  
mDEPT135night CDCl3 {C:\bruk400data\2008\Feb} ejt 27

45.67  
41.58  
40.17  
33.48  
29.70  
27.25  
20.08  
19.54  
19.35  
18.06  
16.81  
14.41  
14.39  
12.01  
11.71

69.16

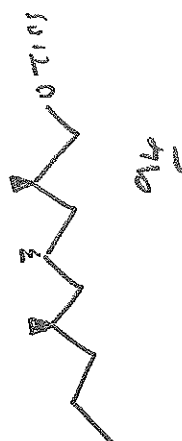

NAME 2008-02-29-ejt-27  
EXPNO 12  
PROCNO 1  
Date\_ 20080229  
Time\_ 17.16  
INSTRUM AV400  
PROBHD 5 mm PABBO BB-  
PULPROG dept135  
TD 65536  
SOLVENT CDCl3  
NS 256  
DS 4  
SWH 24038.461 Hz  
FIDRES 0.366798 Hz  
AQ 1.3631988 sec  
RG 16400  
DW 20.800 usec  
DE 6.50 usec  
TE 294.8 K  
CNS12 145.0000000  
D1 2.00000000 sec  
D2 0.00344828 sec  
D12 0.00002000 sec  
TD0 1

==== CHANNEL f1 =====  
NUC1 13C  
P1 8.00 usec  
P2 16.00 usec  
PL1 0.00 dB  
PL1W 34.91522217 W  
SF01 100.6228298 MHz

==== CHANNEL f2 =====  
CPDPRG2 waltz16  
NUC2 1H  
P3 10.20 usec  
P4 20.40 usec  
PCPD2 80.00 usec  
PL2 -3.60 dB  
PL12 13.80 dB  
PL2W 17.83863831 W  
PL12W 0.32460985 W  
SF02 400.1316005 MHz  
SI 32768  
SF 100.6127690 MHz  
WDW EM  
SSB 0  
LB 1.00 Hz  
GB 0  
PC 1.40

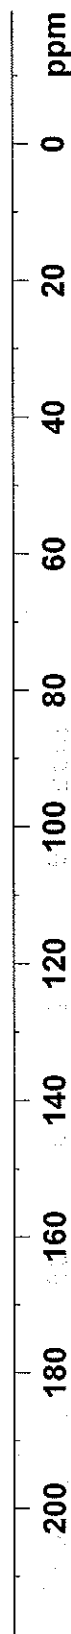

nb221  
mPROTONight CDCI3 {C:\bruk400data\2008\Feb} ejt 5

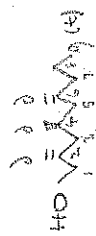

95

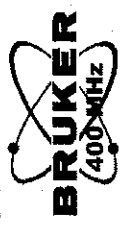

NAME 2008-03-02-ejt-5  
EXPNO 10  
PROCNO 1  
Date\_ 20080302  
Time 19.52  
INSTRUM AV400  
PROBHD 5 mm PABBO BB-  
PULPROG zg30b  
TD 65536  
SOLVENT CDCl3  
NS 16  
DS 0  
SWH 8264.463 Hz  
FIDRES 0.126106 Hz  
AQ 3.9649780 sec  
RG 287  
DW 60.500 usec  
DE 9.40 usec  
TE 294.1 K  
D1 1.00000000 sec  
TD0 1

===== CHANNEL f1 =====  
NUC1 1H  
P1 10.00 usec  
PL1 -3.60 dB  
PL1W 17.83863831 W  
SFO1 400.1324710 MHz  
SI 32768  
SF 400.1300321 MHz  
WDW EM  
SSB 0  
LB 0.30 Hz  
GB 0  
PC 1.00

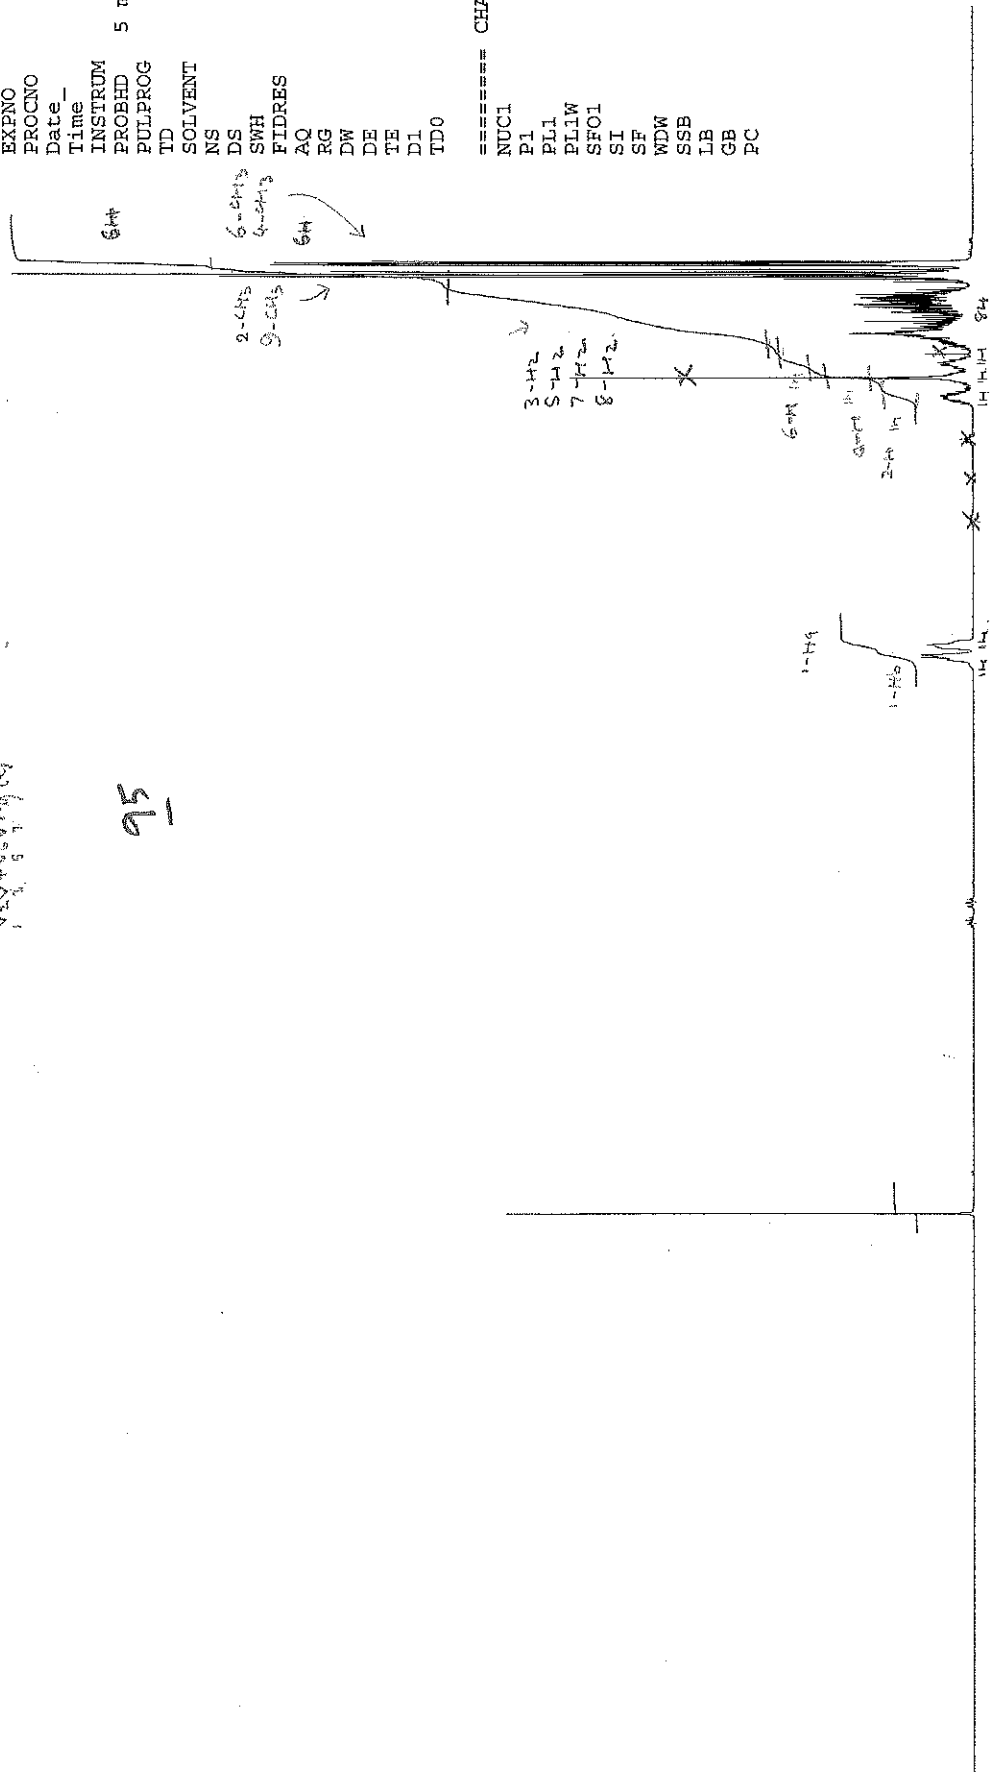

CDCl3

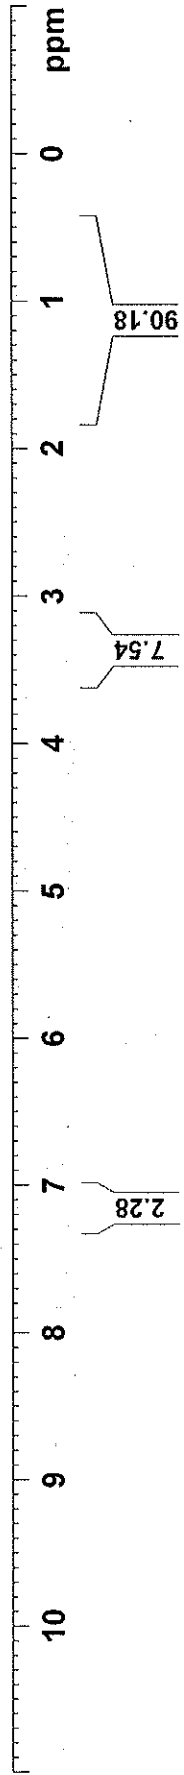

nb215 mPROTONnight CDCl3 /opt/bruk500data/2008/Feb ejt 11

2008-02-23-ejt-11\_010000fid

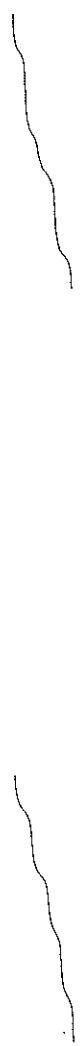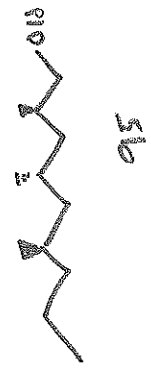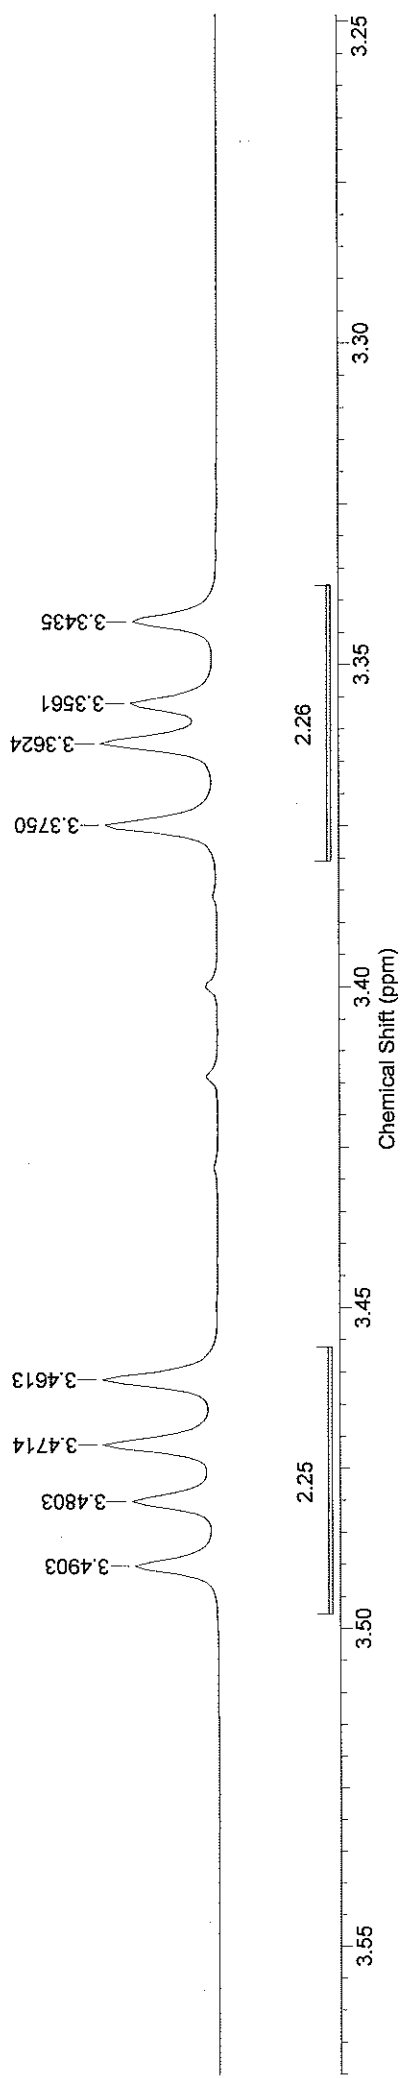

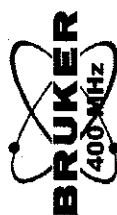

nb221  
mCARBONnight CDCl3 {C:\bruk400data\2008\Feb} ejt 5

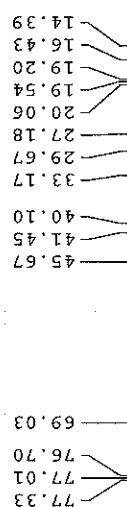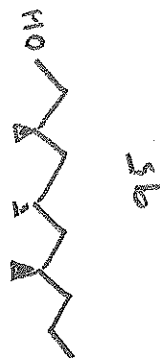

NAME 2008-03-02-ejt-5  
EXPNO 12  
PROCNO 1  
Date\_ 20080302  
Time\_ 20.15  
INSTRUM AV400  
PROBHD 5 mm PABBO BB-  
PULPROG zgpg30  
TD 65536  
SOLVENT CDCl3  
NS 256  
DS 2  
SWH 23809.523 Hz  
FIDRES 0.363304 Hz  
AQ 1.3763061 sec  
RG 512  
DW 21.000 usec  
DE 7.66 usec  
TE 295.3 K  
D1 2.00000000 sec  
D11 0.03000000 sec  
TD0 1

===== CHANNEL f1 =====  
NUC1 13C  
P1 8.00 usec  
PL1 0.00 dB  
PL1W 34.91522217 W  
SF01 100.6228294 MHz

===== CHANNEL f2 =====  
CPDPRG2 waltz16  
NUC2 1H  
PCPD2 80.00 usec  
PL2 -3.60 dB  
PL12 13.80 dB  
PL13 14.00 dB  
PL2W 17.83863831 W  
PL12W 0.32460985 W  
PL13W 0.31000000 W  
SF02 400.1316005 MHz  
SI 32768  
SF 100.6127690 MHz  
WDW EM  
SSB 0  
LB 1.00 Hz  
GB 0  
PC 1.40

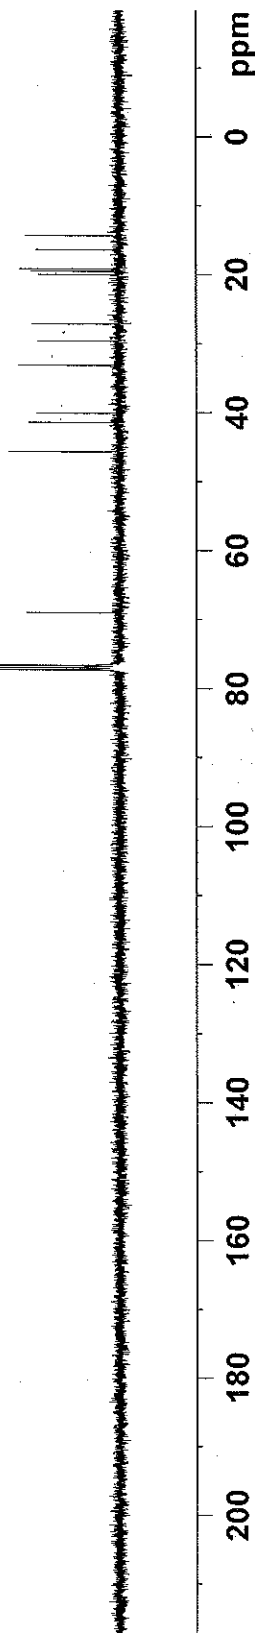

C21H46OSi

C21H46OSi  
FW = 342.33

nb215  
mPROTONight CDC13 /opt/bruk500data/2008/Feb ejt 36

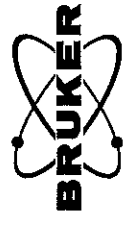

NAME 2008-02-22-ejt-36  
EXPNO 10  
PROCNO 1  
Date\_ 20080223  
Time 6.09  
INSTRUM spect  
PROBHD 5 mm TXI 1H/D-  
PULPROG zg30b  
TD 65536  
SOLVENT CDC13  
NS 16  
DS 0  
SWH 10330.578 Hz  
FIDRES 0.157632 Hz  
AQ 3.1719923 sec  
RG 18  
DW 48.400 usec  
DE 13.46 usec  
TE 300.0 K  
D1 1.00000000 sec  
TD0 1

===== CHANNEL f1 =====  
NUC1 1H  
P1 7.80 usec  
PL1 3.25 dB  
PL1W 12.12272263 W  
SFO1 500.1330885 MHz  
SI 32768  
SF 500.1300460 MHz  
WDW EM  
SSB 0  
LB 0.30 Hz  
GB 0  
PC 1.00

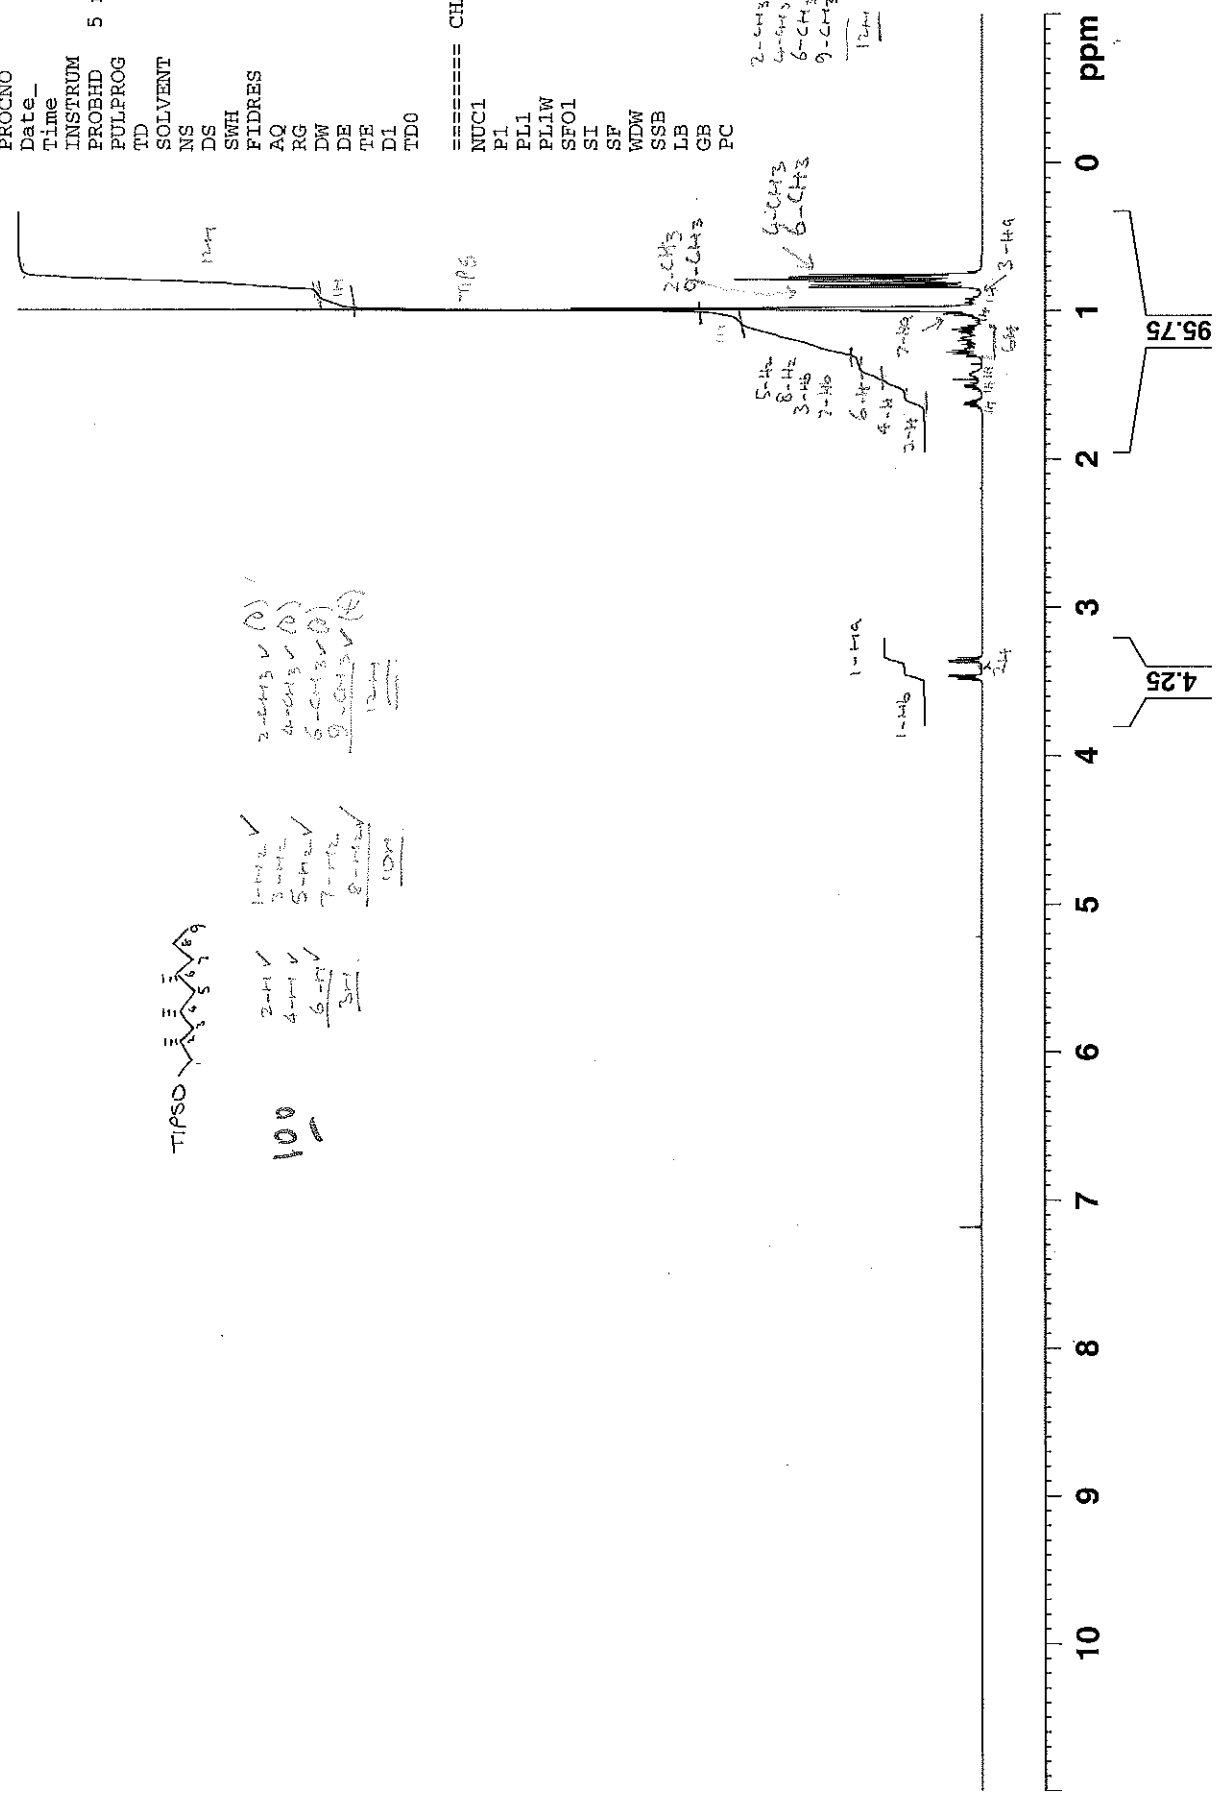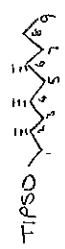

100  
2-H ✓  
3-H ✓  
4-H ✓  
5-H ✓  
6-H ✓  
7-H ✓  
8-H ✓  
9-H ✓  
10-H ✓  
11-H ✓  
12-H ✓  
13-H ✓  
14-H ✓  
15-H ✓  
16-H ✓  
17-H ✓  
18-H ✓  
19-H ✓  
20-H ✓  
21-H ✓

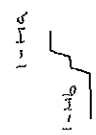

1-H  
2-H  
3-H  
4-H  
5-H  
6-H  
7-H  
8-H  
9-H  
10-H  
11-H  
12-H  
13-H  
14-H  
15-H  
16-H  
17-H  
18-H  
19-H  
20-H  
21-H

2-CH3  
3-CH3  
4-CH3  
5-CH3  
6-CH3  
7-CH3  
8-CH3  
9-CH3  
10-CH3  
11-CH3  
12-CH3  
13-CH3  
14-CH3  
15-CH3  
16-CH3  
17-CH3  
18-CH3  
19-CH3  
20-CH3  
21-CH3



nb215  
mCARBONnight CDC13 /opt/bruk500data/2008/Feb ejt 36

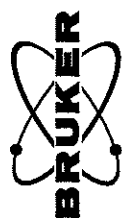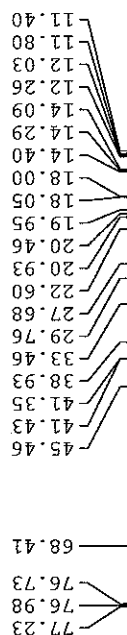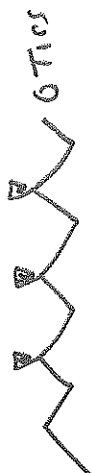

100

NAME 2008-02-23-ejt-36  
EXPNO 11  
PROCNO 1  
Date\_ 20080223  
Time 6.23  
INSTRUM spect  
PROBHD 5 mm TXI 1H/D-  
PULPROG zgpg30  
TD 65536  
SOLVENT CDC13  
NS 256  
DS 2  
SWH 29761.904 Hz  
FIDRES 0.454131 Hz  
AQ 1.1010548 sec  
RG 512  
DE 16.800 usec  
TE 32.63 usec  
D1 300.0 K  
D11 2.00000000 sec  
D11 0.03000000 sec  
TD0 1

===== CHANNEL f1 =====  
NUC1 13C  
P1 9.50 usec  
PL1 -4.20 dB  
PL1W 218.02882385 W  
SF01 125.7703643 MHz

===== CHANNEL f2 =====  
CPDPRG2 waltz16  
NUC2 1H  
PCPD2 80.00 usec  
PL2 4.20 dB  
PLI2 23.47 dB  
PLI3 23.00 dB  
PL2W 9.74092484 W  
PLI2W 0.11523920 W  
PLI3W 0.12841040 W  
SFO2 500.1320005 MHz  
SI 32768  
SF 125.7577890 MHz  
WDW EM  
SSB 0  
LB 1.00 Hz  
GB 0  
PC 1.40

200 180 160 140 120 100 80 60 40 20 0 ppm

nb218

mPROTON CDCl<sub>3</sub> {C:\bruk400data\2008\Feb} ejt 28

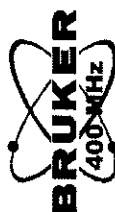

NAME 2008-02-29-ejt-28

EXPNO 10

PROCNO 1

Date\_ 20080229

Time\_ 14.21

INSTRUM AV400

PROBHD 5 mm PABBO BB-

PULPROG zg30b

TD 65536

SOLVENT CDCl<sub>3</sub>

NS 16

DS 0

SWH 8264.463 Hz

FIDRES 0.126106 Hz

AQ 3.9649780 sec

RG 203

DW 60.500 usec

DE 9.40 usec

TE 294.0 K

D1 1.00000000 sec

TD0 1

===== CHANNEL f1 =====

NUC1 1H

P1 10.00 usec

PL1 -3.60 dB

PL1W 17.83863831 W

SFO1 400.1324710 MHz

SI 32768

SF 400.1300320 MHz

WDW EM

SSB 0

LB 0.30 Hz

GB 0

PC 1.00

C12 H26 O

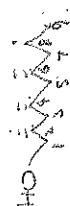

101

2-CH<sub>3</sub>  
4-CH<sub>3</sub>  
6-CH<sub>3</sub>  
9-CH<sub>3</sub>  
12-CH<sub>3</sub>

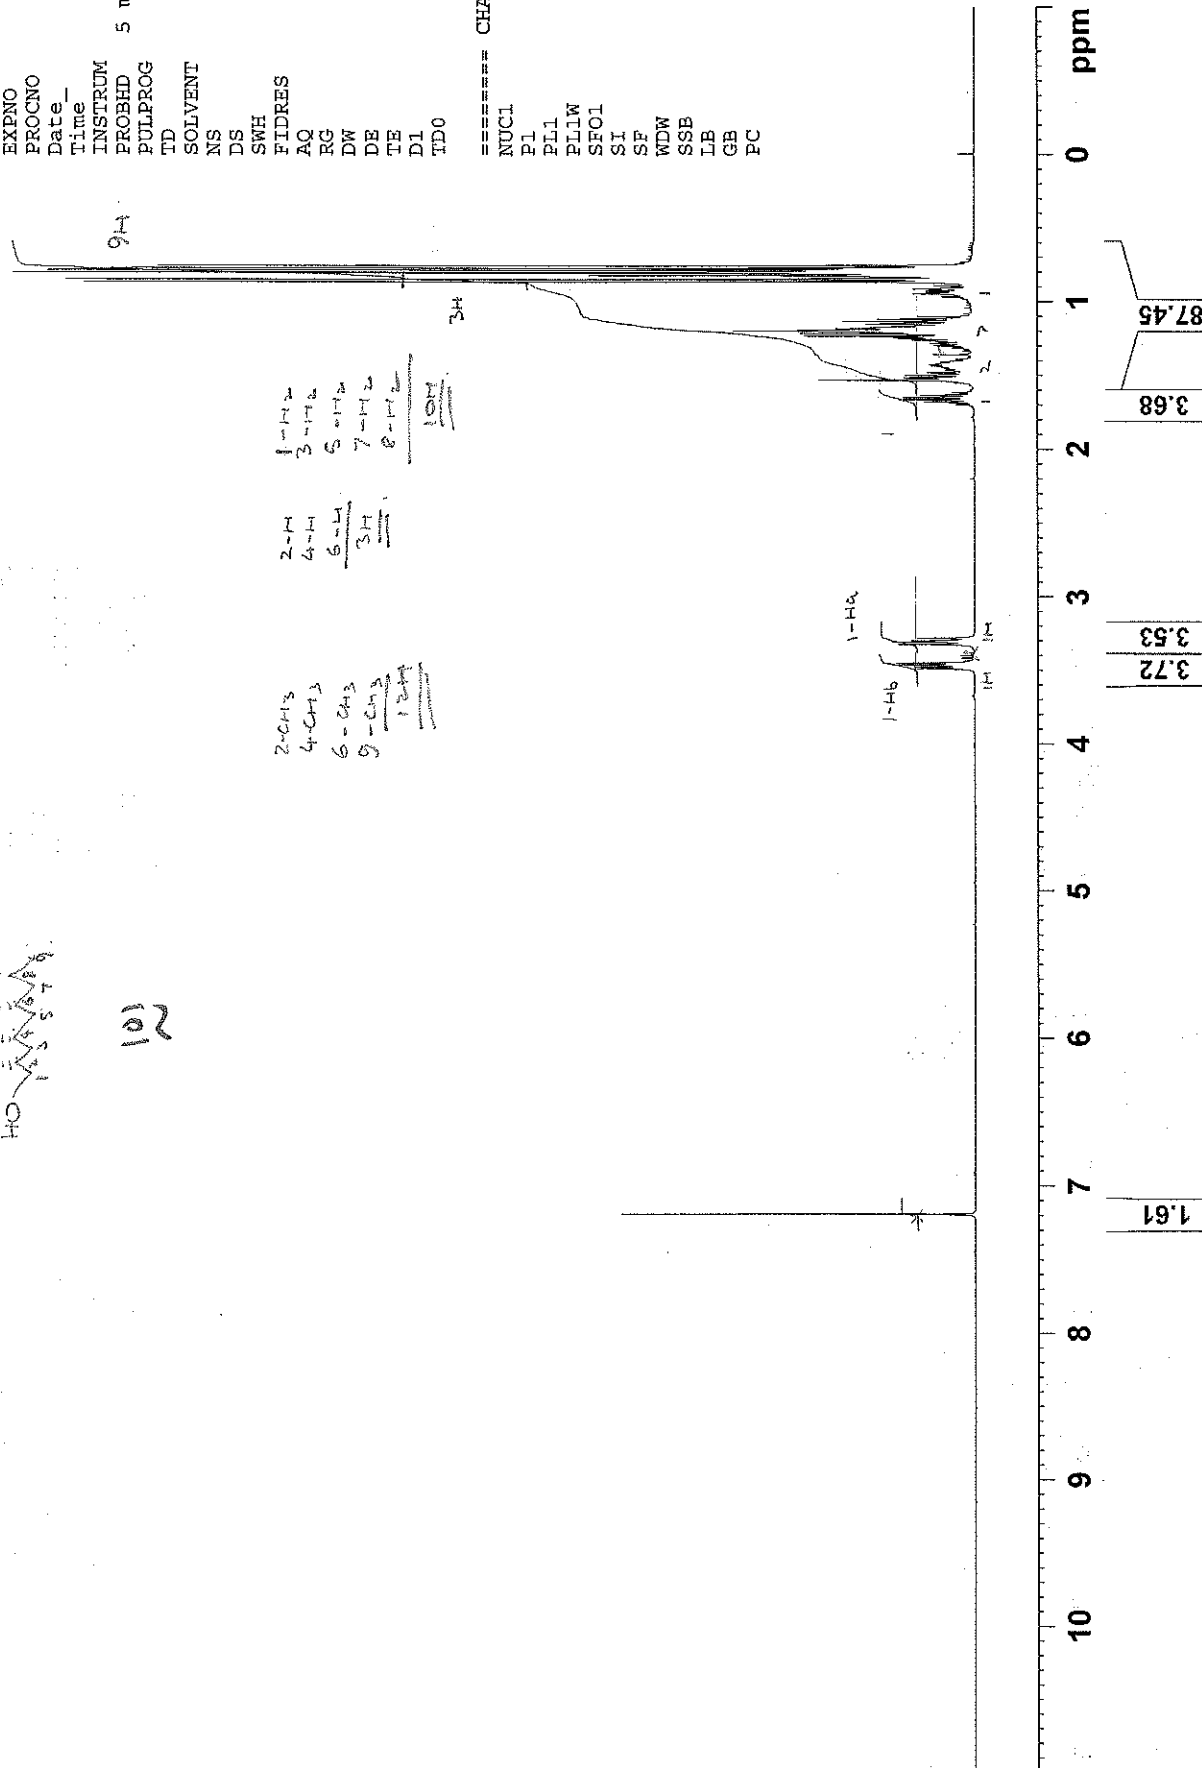

nb218 mPROTON CDCl3 (C:\bruk400data\2008\Feb) ejt 28

2008-02-29-ejt-28\_010000fid

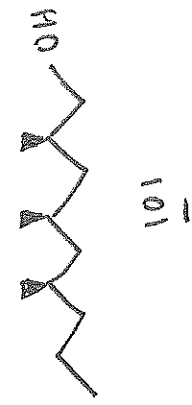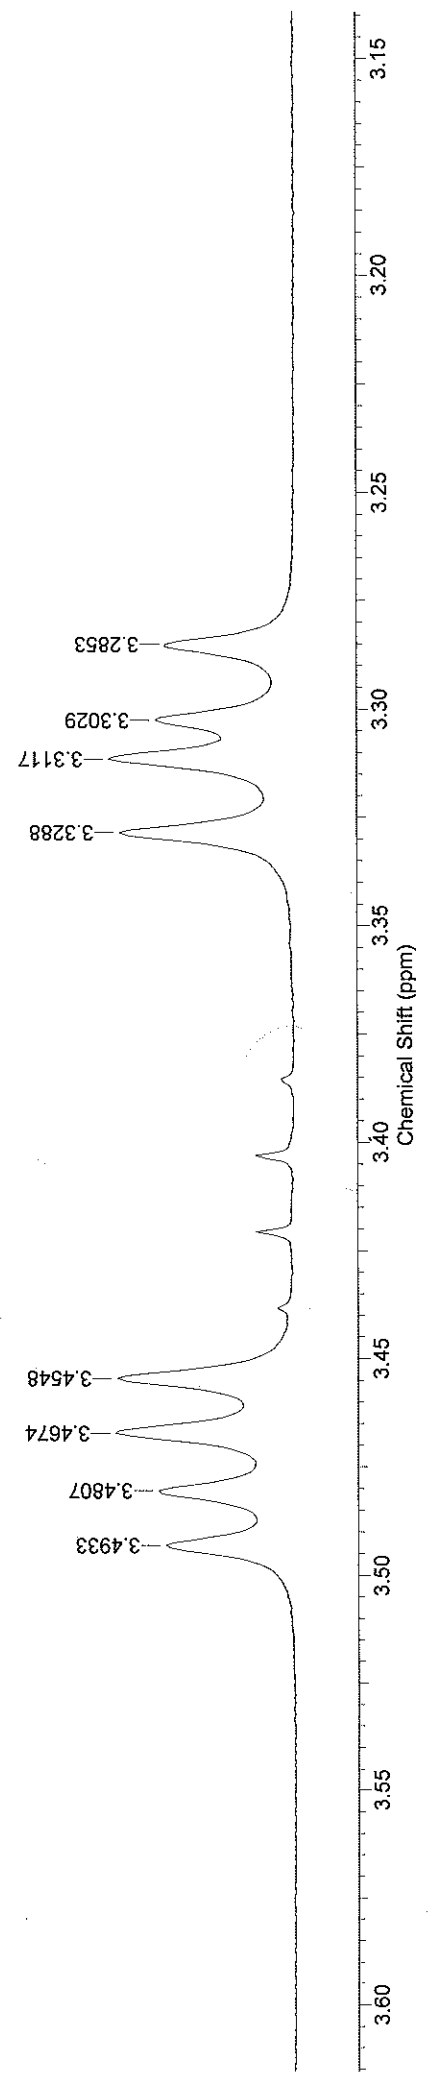

nb218  
mCARBONnight CDCl3 /opt/bruk500data/2008/Feb ejt 32

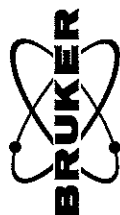

77.25  
77.00  
76.74  
68.28  
65.84  
45.17  
41.27  
38.83  
33.10  
29.74  
27.54  
22.32  
20.91  
20.42  
19.94  
17.53  
15.25  
14.41  
14.03

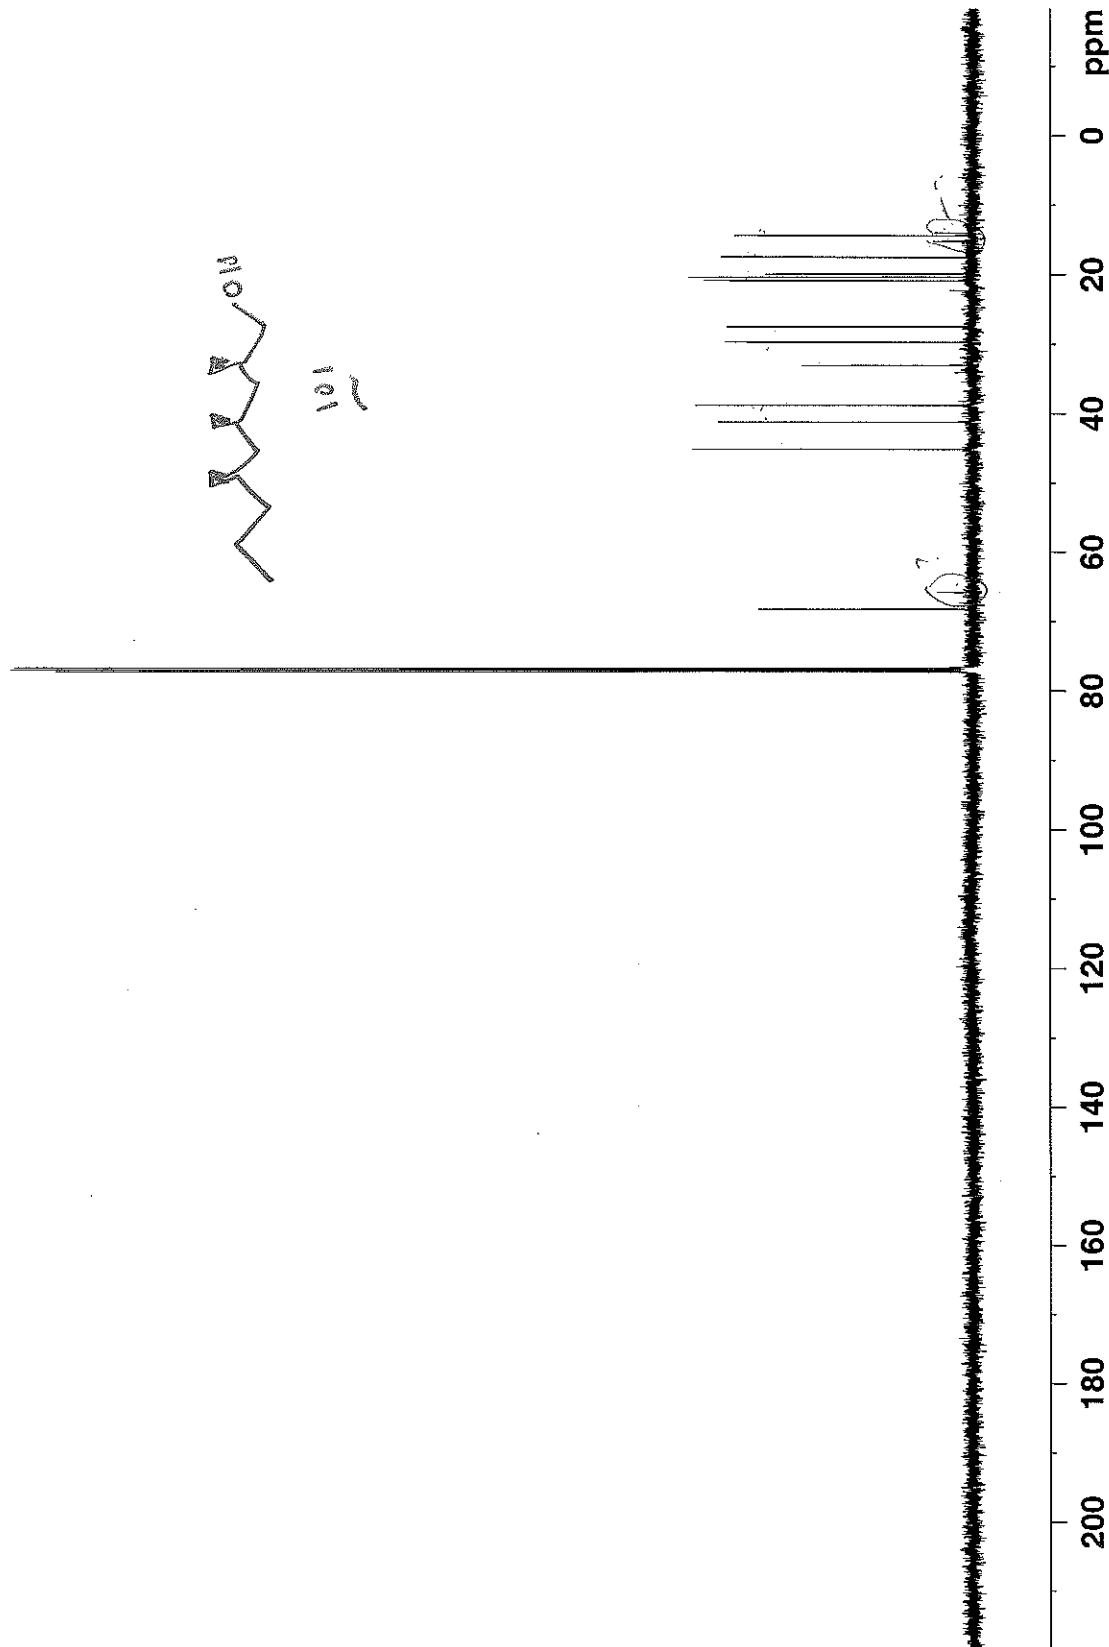

```

NAME      2008-02-26-ejt-32
EXPNO     11
PROCNO    1
Date_     20080227
Time      9.30
INSTRUM   spect
PROBHD    5 mm TXI 1H/D-
PULPROG   zgpg30
TD         65536
SOLVENT   CDCl3
NS         256
DS         2
SWH        29761.904 Hz
FIDRES     0.454131 Hz
AQ         1.1010548 sec
RG         512
DE         16.800 usec
TE         32.63 usec
D1         300.0 K
D11        2.00000000 sec
D12        0.03000000 sec
TD0        1

===== CHANNEL f1 =====
NUC1       13C
P1         9.50 usec
PL1        -4.20 dB
PL1W       218.02882385 W
SFO1       125.7703643 MHz

===== CHANNEL f2 =====
CPDPRG2    waitz16
NUC2       1H
PCPD2      80.00 usec
PL2        4.20 dB
PL12       23.47 dB
PL13       23.00 dB
PL2W       9.74092484 W
PL12W      0.11523920 W
PL13W      0.12841040 W
SFO2       500.1320005 MHz
SI         32768
SF         125.7577890 MHz
WDW        EM
SSB        0
LB         1.00 Hz
GB         0
PC         1.40
    
```
